# Supplementary material
Source: PubMed Central journal article supplement (PMC7121492)
Supplement: NEJMoa2001282_protocol.pdf [file NEJMoa2001282_protocol.pdf]

# Protocol

This trial protocol has been provided by the authors to give readers additional information about their work.

Protocol for: Cao B, Wang Y, Wen D, et al. A trial of lopinavir–ritonavir in adults hospitalized with severe Covid-19. *N Engl J Med*. DOI: 10.1056/NEJMoa2001282

This document contains:

- The original protocol document (v1.0)
- The final protocol document (v2.0)
- A summary of changes between protocol version 1.0 and 2.0
- The statistical analysis plan (unchanged from original version)

一项评价洛匹那韦/利托那韦和干扰素- $\alpha$ 2b 联合治疗武汉新型冠状病毒感染住院患者的疗效和安全性随机、开放、空白对照的研究

A randomized, open-label study to evaluate the efficacy and safety of lopinavir-ritonavir and interferon- $\alpha$  in hospitalized patients with novel coronavirus infection

研究方案识别码/方案编号: <CAP-China coronavirus treatment >

版本编号: v.1.0

2020 年 01 月 09 日

## 修改记录

| 修改日期 | 版本号 | 章节 | 修改主要内容 |
|------|-----|----|--------|
|      |     |    |        |
|      |     |    |        |
|      |     |    |        |

## 目录

|                             |           |
|-----------------------------|-----------|
| 缩略语列表 .....                 | 6         |
| 合规性声明 .....                 | 9         |
| 方案摘要 .....                  | 10        |
| 研究设计示意图 .....               | 13        |
| <b>1 研究管理</b> .....         | <b>15</b> |
| <b>2 引言：背景信息与科学依据</b> ..... | <b>16</b> |
| 2.1 背景信息 .....              | 16        |
| 2.2 基本原理 .....              | 17        |
| 2.3 潜在风险和获益 .....           | 18        |
| 2.3.1 已知的潜在风险 .....         | 18        |
| 2.3.2 已知的潜在获益 .....         | 19        |
| <b>3 目的与目标</b> .....        | <b>20</b> |
| <b>4 研究设计和观察终点</b> .....    | <b>21</b> |
| 4.1 研究设计描述 .....            | 21        |
| 4.2 研究终点 .....              | 22        |
| 4.2.1 主要终点 .....            | 22        |
| 4.2.2 次要终点 .....            | 23        |
| <b>5 研究入组与退出</b> .....      | <b>23</b> |
| 5.1 受试者入选标准 .....           | 23        |
| 5.2 受试者排除标准 .....           | 24        |

|          |                       |           |
|----------|-----------------------|-----------|
| 5.3      | 招募和保留策略 .....         | 24        |
| 5.4      | 受试者退出或终止试验 .....      | 24        |
| 5.4.1    | 退出或终止的原因 .....        | 25        |
| 5.4.2    | 受试者撤回或终止研究的处理 .....   | 25        |
| <b>6</b> | <b>研究药物</b> .....     | <b>26</b> |
| 6.1      | 研究药物 .....            | 26        |
| 6.1.1    | 采集 .....              | 26        |
| 6.1.2    | 产品储存和稳定性 .....        | 26        |
| 6.1.3    | 药物制备 .....            | 26        |
| 6.1.4    | 用量用法 .....            | 27        |
| 6.1.5    | 治疗持续时间 .....          | 27        |
| 6.1.6    | 剂量跟踪 .....            | 27        |
| 6.2      | 研究药物清点程序 .....        | 27        |
| <b>7</b> | <b>研究程序和时间表</b> ..... | <b>27</b> |
| 7.1      | 研究程序 / 评价 .....       | 27        |
| 7.1.1    | 研究特殊流程 .....          | 27        |
| 7.1.2    | 标准治疗研究程序 .....        | 28        |
| 7.2      | 实验室程序 / 评价 .....      | 28        |
| 7.2.1    | 临床实验室评价 .....         | 28        |
| 7.2.2    | 其他检测或程序 .....         | 28        |
| 7.2.3    | 样本制备、处理和储存 .....      | 28        |
| 7.2.4    | 样本运输 .....            | 29        |

|          |                      |           |
|----------|----------------------|-----------|
| 7.2.5    | 样本的预期用途.....         | 29        |
| 7.3      | 研究时间表.....           | 29        |
| 7.3.1    | 筛选.....              | 29        |
| 7.3.2    | 入组 / 基线.....         | 33        |
| 7.3.3    | 随访.....              | 34        |
| 7.3.4    | 最终研究访视.....          | 31        |
| 7.3.5    | 提前退出访视.....          | 36        |
| 7.3.6    | 事件时间表.....           | 37        |
| 7.4      | 合并药物、治疗和程序.....      | 38        |
| 7.4.1    | 需要注意的药物、治疗和程序.....   | 38        |
| 7.5      | 禁用药物、治疗和程序.....      | 41        |
| 7.6      | 急救药物、治疗和程序.....      | 41        |
| 7.7      | 研究关闭后受试者的研究药物获取..... | 41        |
| <b>8</b> | <b>安全性评估.....</b>    | <b>41</b> |
| 8.1      | 安全性参数质量标准.....       | 41        |
| 8.1.1    | 不良事件（AE）的定义.....     | 2         |
| 8.1.2    | 严重不良事件（SAE）的定义.....  | 41        |
| 8.1.3    | 非预期问题（UP）的定义.....    | 41        |
| 8.2      | 不良事件分类.....          | 42        |
| 8.2.1    | 事件严重程度.....          | 42        |
| 8.2.2    | 与研究药物的关系.....        | 43        |
| 8.2.3    | 可预期的严重不良事件.....      | 44        |

|           |                              |           |
|-----------|------------------------------|-----------|
| 8.3       | 事件评估和随访的时间期限和频率 .....        | 44        |
| 8.4       | 报告程序 .....                   | 45        |
| 8.4.1     | 不良事件报告 .....                 | 45        |
| 8.4.2     | 严重不良事件报告 .....               | 46        |
| 8.4.3     | 疑似非预期严重不良反应 (SUSAR) .....    | 47        |
| 8.5       | 研究终止规则 .....                 | 48        |
| 8.6       | 安全性监查 .....                  | 48        |
| <b>9</b>  | <b>统计学考量</b> .....           | <b>49</b> |
| 9.1       | 概述 .....                     | 49        |
| 9.2       | 统计数据集 .....                  | 49        |
| 9.3       | 样本量 .....                    | 9         |
| 9.4       | 随机化与盲法 .....                 | 9         |
| 9.4.1     | 随机化 .....                    | 错误!未定义书签。 |
| 9.4.2     | 设盲 .....                     | 50        |
| 9.4.3     | 紧急揭盲 .....                   | 50        |
| <b>10</b> | <b>源文件与源数据 / 文件的访问</b> ..... | <b>51</b> |
| <b>11</b> | <b>质量保证和质量控制</b> .....       | <b>51</b> |
| 11.1.     | 研究者材料 .....                  | 51        |
| 11.2.     | 研究材料 .....                   | 51        |
| 11.3.     | 启动 .....                     | 51        |
| 11.4.     | 研究期间的监察 .....                | 51        |
| 11.5.     | 研究中心关闭 .....                 | 51        |



|           |                            |           |
|-----------|----------------------------|-----------|
| <b>12</b> | <b>伦理 / 人类受试者保护</b> .....  | <b>52</b> |
| 12.1      | 伦理学标准.....                 | 52        |
| 12.2      | 机构审查委员会.....               | 13        |
| 12.3      | 知情同意程序.....                | 13        |
| 12.3.1    | 提供给受试者的知情 / 同意和其他须知文件..... | 13        |
| 12.3.2    | 知情同意程序和记录.....             | 14        |
| 12.4      | 受试者和数据保密.....              | 14        |
| 12.4.1    | 研究使用的存储人体样本、标本或数据.....     | 54        |
| <b>13</b> | <b>数据处理与记录保存</b> .....     | <b>54</b> |
| 13.1      | 数据采集和管理责任.....             | 54        |
| 13.2      | 研究记录保存.....                | 54        |
| 13.3      | 方案偏离.....                  | 54        |
| 13.4      | 发表和数据共享政策.....             | 15        |
| <b>14</b> | <b>利益冲突政策</b> .....        | <b>15</b> |
| <b>15</b> | <b>参考文献</b> .....          | <b>15</b> |
|           | <b>附录</b> .....            | <b>57</b> |

## 缩略语列表

| 英文缩写 | 中文名称         |
|------|--------------|
| ADR  | 药物不良反应       |
| AE   | 不良事件         |
| APPT | 活化部分凝血活酶时间   |
| ALP  | 碱性磷酸酶        |
| AST  | 天冬氨酸氨基转移酶    |
| ARDS | 急性呼吸窘迫综合征    |
| BAL  | 支气管肺泡灌洗      |
| BID  | 每日两次         |
| BUN  | 血尿素氮         |
| CBC  | 全血细胞计数       |
| CDC  | 疾病控制和预防中心    |
| CFDA | 国家食品药品监督管理总局 |
| CRF  | 病例报告表        |

|      |                  |
|------|------------------|
| CRRT | 连续肾脏替代治疗         |
| ECG  | 心电图              |
| ECMO | 体外膜肺氧合           |
| GCP  | 药物临床试验质量管理规范     |
| GFR  | 肾小球滤过率           |
| IB   | 研究者手册            |
| ICH  | 人用药品注册技术要求国际协调会议 |
| ICU  | 重症监护室            |
| IEC  | 独立伦理委员会          |
| IL   | 白介素              |
| IP   | 试验用药物            |
| IRB  | 机构审查委员会          |
| LDH  | 乳酸脱氢酶            |
| RNA  | 核糖核酸             |
| PCR  | 聚合酶链反应           |
| PT   | 凝血酶原时间           |
| PCR  | 聚合酶链反应           |

|     |        |
|-----|--------|
| SAE | 严重不良事件 |
| SAP | 统计分析计划 |
| U+E | 尿素+电解质 |
| ULN | 正常值上限  |

### 机密

本文件提供的信息严格保密，仅用于指导本研究。未经项目组预先批准，不得向与研究无关的其他方复制或披露本文件的部分或全部内容，也不得将其用于任何其他目的。

### 合规性声明

将按照 ICH E6、GCP 指南和主管部门相关管理规定开展本试验。将按照本方案的所有规定、伦理委员会批准条件开展本研究。

签名 (PI) : \_\_\_\_\_

## 方案摘要

|           |                                                                                                                                                                                                                                                                                                                                                                                                                                                                                                                                                                                                                                                                                                                                                                      |
|-----------|----------------------------------------------------------------------------------------------------------------------------------------------------------------------------------------------------------------------------------------------------------------------------------------------------------------------------------------------------------------------------------------------------------------------------------------------------------------------------------------------------------------------------------------------------------------------------------------------------------------------------------------------------------------------------------------------------------------------------------------------------------------------|
| <b>标题</b> | 一项评价洛匹那韦/利托那韦和干扰素- $\alpha$ 2b 联合治疗武汉新型冠状病毒感染住院患者的疗效和安全性的随机、开放、空白对照的研究                                                                                                                                                                                                                                                                                                                                                                                                                                                                                                                                                                                                                                                                                               |
| <b>背景</b> | <p>新型冠状病毒感染是导致国内外突发公共卫生事件的重要原因，严重影响人民健康和社会稳定。2003 年我国暴发 SRAR-COV 造成了严重的社会影响。从 2002 年 1 月至 2003 年 8 月 7 日，全球累计病例共 8422 例，涉及 32 个国家和地区，其中死亡病例 919 例，病死率近 11%，老年患者和合并症患者的病死率更高。2012 年首次报告中东呼吸综合征冠状病毒 (MERS-COV) 感染以来，世界卫生组织已收到来自 27 个国家的 2468 例实验室确诊的 MERS-COV 感染病例通知，至少有 851 例报告死亡（病死率 34.5%）。</p> <p>目前尚无针对冠状病毒感染的确切有效治疗方法。基于体外数据，洛匹那韦利托那韦被认为是冠状病毒的候选治疗。洛匹那韦和利托那韦是抗逆转录病毒蛋白酶抑制剂，联合用于治疗人类免疫缺陷病毒 (HIV) 感染，且安全性较好。洛匹那韦/利托那韦联合曾用于 SARS 感染的治疗。在该项研究中，与 111 例接受利巴韦林治疗的 SARS 患者相比，41 例患者使用洛匹那韦/利托那韦联合治疗，结果发现症状发作后 21 天的不良临床结局（急性呼吸窘迫综合征或死亡）明显少于利巴韦林单药治疗（2.4%VS. 28.8%，<math>P = 0.001</math>）。然而，历史对照对照的研究数据无法可靠估计有效性。基于发现以及洛匹那韦/利托那韦和 IFN-<math>\beta</math>1B 的可用和安全性数据，2015 年日内瓦世界卫生组织召开 MERS 防治大会，认为洛匹那韦/利托那韦联合干扰素治疗具有潜在疗效。</p> <p>自 2019 年 12 月以来湖北省武汉市多家医院发现不明原因肺炎多</p> |

|    |                                                                                                                                                                                                                                                                      |
|----|----------------------------------------------------------------------------------------------------------------------------------------------------------------------------------------------------------------------------------------------------------------------|
|    | <p>例，部分病例核酸和二代测序结果提示为新型冠状病毒感染。鉴于应对此次疫情，无有效抗病毒治疗方案的情况下，国家和当地医疗救治组紧急启动该项研究，旨在评估多种可能有效的治疗措施（包括但不限于洛匹那韦/利托那韦和干扰素联合，remdesivir，针对冠状病毒的单/多克隆抗体），探索最优的抗病毒治疗方案。</p> <p>第一阶段：将评估洛匹那韦/利托那韦和干扰素-<math>\alpha</math> 2b（IFN-<math>\alpha</math>2b）联合治疗武汉新型冠状病毒感染住院患者的疗效和安全性。</p> |
| 目的 | 评价洛匹那韦/利托那韦和 IFN- $\alpha$ 2b 治疗新型冠状病毒感染的成人住院患者的疗效和安全性。                                                                                                                                                                                                              |
| 设计 | 随机、开放标签、平行对照临床试验。根据患者入组 24 小时内需要的氧疗支持水平进行分层随机化（分层标准：是否需要无创及更高强度呼吸支持治疗）。                                                                                                                                                                                              |
| 终点 | <p><b>主要终点：</b></p> <p>入组 28 天临床改善时间（time to clinical improvement）：随机化后至临床改善的天数。临床改善定义为患者入院状态的 7 分等级量表评分降低 2 分或者出院。</p> <p>7 分等级量表包括：</p> <p>7 分：死亡；</p> <p>6 分：住院接受 ECMO 和 / 或机械通气；</p> <p>5 分：住院接受无创通气和 / 或高流量氧疗；</p> <p>4 分：住院接受氧疗；</p> <p>3 分：住院不需要接受氧疗；</p>     |

|       |                                                                                                                                                                                                                                                                                                                                                                                                                                                                                                                                                                                           |
|-------|-------------------------------------------------------------------------------------------------------------------------------------------------------------------------------------------------------------------------------------------------------------------------------------------------------------------------------------------------------------------------------------------------------------------------------------------------------------------------------------------------------------------------------------------------------------------------------------------|
|       | <p>2 分：出院但未恢复正常功能状态；</p> <p>1 分：出院已恢复正常功能状态。</p>                                                                                                                                                                                                                                                                                                                                                                                                                                                                                                                                          |
| 干预    | 洛匹那韦/利托那韦 400mg bid（2 片口服 bid）和 IFN- $\alpha$ 2b 500 万 iu，吸入，bid。                                                                                                                                                                                                                                                                                                                                                                                                                                                                                                                         |
| 人群    | 所有新型冠状病毒感染的成人住院患者                                                                                                                                                                                                                                                                                                                                                                                                                                                                                                                                                                         |
| 合格性标准 | <p><b>入选标准：</b></p> <ol style="list-style-type: none"> <li>1. 成人（定义为<math>\geq 18</math> 岁）</li> <li>2. 在尚未开发出快速诊断试剂盒情况下，经过临床诊断的不明原因病毒性肺炎患者；或经过 PCR 确证的新型冠状病毒感染患者。</li> <li>3. 症状发作与随机入组之间的时间间隔在 10 天以内，症状发作主要以发热作为判定依据，若无发热可使用咳嗽或其他相关症状。</li> <li>4. 静息未吸氧状态下，患者 <math>SPO_2 \leq 94\%</math>，或氧合指数小于 300mmHg。</li> </ol> <p><b>排除标准：</b></p> <ol style="list-style-type: none"> <li>1. 任何不能让方案安全进行的情况；</li> <li>2. 已知患者自杀意念（IFN-<math>\alpha</math> 2b 禁忌）；</li> <li>3. 对洛匹那韦/利托那韦或重组 IFN-<math>\alpha</math> 2b 的已知过敏或超敏反应；</li> <li>4. 谷丙转氨酶 (ALT)/谷草转氨酶（AST）升高超过正常上限 5 倍；</li> </ol> |



|                      |                                                                                                                                                                                                                                                                                                                                                                                           |
|----------------------|-------------------------------------------------------------------------------------------------------------------------------------------------------------------------------------------------------------------------------------------------------------------------------------------------------------------------------------------------------------------------------------------|
|                      | <p>5. 禁用于洛匹那韦/利托那韦治疗且在研究期间不能更换或停用的药物，例如 CYP3A 抑制剂；</p> <p>6. 妊娠：育龄女性妊娠试验阳性；</p> <p>7. 已知 HIV 感染，因为担心如果未与其他抗 HIV 药物联合使用，会对洛匹那韦/利托那韦产生耐药性；</p> <p>8. 患者可能在 72h 内转至非参与医院。</p>                                                                                                                                                                                                                |
| <p><b>样本量</b></p>    | <p>初步估计 160 例</p>                                                                                                                                                                                                                                                                                                                                                                         |
| <p><b>研究药物描述</b></p> | <p>1. 洛匹那韦利托那韦片（克力芝®），洛匹那韦是一种 HIV 蛋白酶抑制剂；利托那韦是一种针对 HIV-1 和 HIV-2 天冬氨酸蛋白酶的活性拟肽类抑制剂。</p> <p>规格及主要成份：250mg/片 120 片/瓶。本品为复方制剂，每片含洛匹那韦 200 mg，利托那韦 50 mg。</p> <p>贮藏条件：室温保存（低于 30 °C）。</p> <p>生产企业：艾伯维</p> <p>2. 重组人干扰素 α 2b 注射液（安福隆），干扰素是机体抗病物质之一，具有广谱的非特异性的抗病毒性，其并不直接杀灭病毒，而是作用于对病毒敏感的细胞，改变细胞代谢功能，使细胞抑制甚至终止病毒的繁殖。</p> <p>规格：500 万单位/支</p> <p>贮藏条件：2-8°C 避光保存。配制后暂存条件及效期：2-8°C 避光保存，7 天内使用。</p> |

|           |                                           |
|-----------|-------------------------------------------|
|           | 生产企业：天津未名生物医药有限公司<br><br>提供方：天津未名生物医药有限公司 |
| 研究持续时间    | 自项目通过伦理委员会审查后，直至达到预计样本量或疫情结束。             |
| 参加研究的持续时间 | 从筛选到随机化后的 28 天                            |

### 研究设计示意图

本研究是一项多中心、随机、开放、空白对照临床研究，由于尚无有效的治疗措施，项目组将根据实际情况，陆续评估可能有效的治疗措施（包括但不限于洛匹那韦/利托那韦和干扰素联合，remdesivir，针对冠状病毒的单/多克隆抗体），探索最为优效的抗病毒治疗方案。

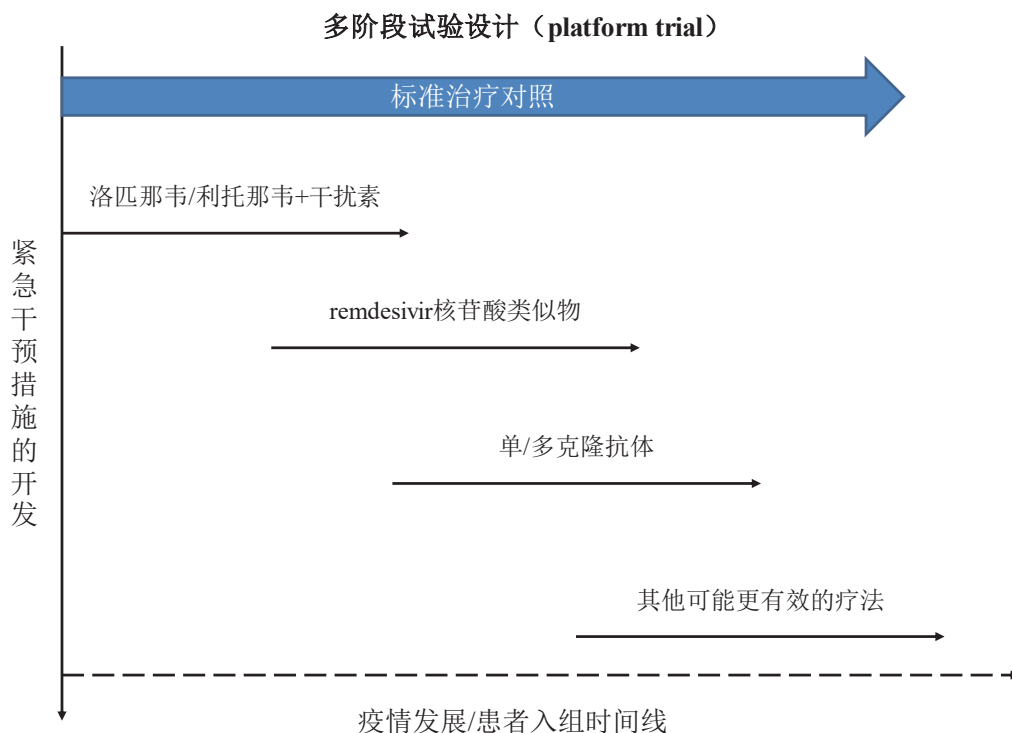

第一阶段：在 160 例新型冠状病毒感染的住院成年患者中评估洛匹那韦/利托那韦和干扰素- $\alpha$  2b 联合与标准治疗相比的有效性和安全性。受试者将按 1:1 的比例分配，接受标准治疗或联合抗病毒治疗。

## 研究流程图

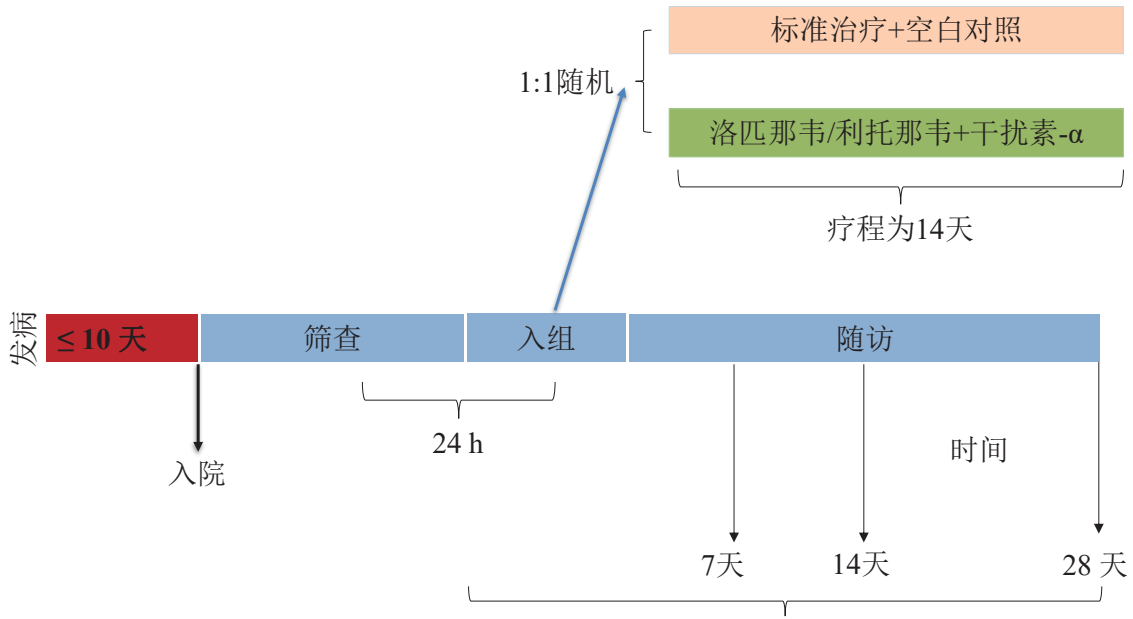

主要终点：随机化后28天临床改善时间；  
次要终点：7/14/28天临床改善率；28天病死率；住院时间等；

### 1 研究管理

研究中心：武汉市金银潭医院。

#### 试验指导委员会

[Redacted text]

#### 试验执行委员会

[Redacted text]

████████████████████

████████████████████

**试验登记：**由于是应急项目和相关的保密要求，本方案的详细信息信息必要时**后续**将登记在美国国家临床试验注册中心（ClinicalTrials.gov）。

## 2 引言：背景信息与科学依据

### 2.1 背景信息

新型冠状病毒感染是导致国内外突发公共卫生事件的重要原因，严重影响人民健康和社会稳定。2003 年我国暴发 SRAR-COV 造成了严重的社会影响<sup>1,2</sup>。从 2002 年 1 月至 2003 年 8 月 7 日，全球累计病例共 8422 例，涉及 32 个国家和地区，其中死亡病例 919 例，病死率近 11%，老年患者和合并症患者的病死率更高。2012 年首次报告中东呼吸综合征冠状病毒 (MERS-COV) 感染以来，世界卫生组织已收到来自 27 个国家的 2468 例实验室确诊的 MERS-COV 感染病例通知，至少有 851 例报告死亡（病死率 34.5%）<sup>3</sup>。

目前尚无针对冠状病毒感染的确切有效治疗方法。基于 SARC-COV 和 MERS-COV 感染的体外和动物研究结果，鸟嘌呤核苷类似物利巴韦林联合 IFN 已被用于治疗 MERS 患者<sup>4,5</sup>。然而，体外抑制 MERS-COV 所需的利巴韦林浓度超过人体治疗剂量后血液中的峰值浓度<sup>6</sup>。而且，干扰素联合利巴韦林的回顾性研究未显示 MERS 患者存在明确的临床获益<sup>7</sup>。

在体外,IFN- $\alpha$ 2b 对 MERS-COV 和密切相关的冠状病毒严重急性呼吸综合征 (SARS)-COV 具有抑制作用，但 MERS-COV 对 IFN 效应的敏感性显著高于 SARS-COV<sup>8</sup>。

基于体外数据，洛匹那韦利托那韦被认为是冠状病毒的候选治疗。洛匹那韦和利托那韦是抗逆转录病毒蛋白酶抑制剂，联合用于治疗人类免疫缺陷病毒 (HIV) 感染，且安全性较好<sup>9</sup>。洛匹那韦/利托那韦联合曾用于 SARS 感染的治疗。在该项研究中，与 111 例接受利巴韦林治疗的 SARS 患者相比，41 例患者使用洛匹那韦/利托那韦联合治疗，结果发现症状发作后 21 天的不良临床结局（急性呼吸窘迫综合征或死亡）明显少于利巴韦林单药治疗（2.4%VS. 28.8%，P = 0.001）<sup>10</sup>。然而，历史对照对照的研究数据无法可靠估计有效性。在 2015 年韩国暴发 MERS 的一例病例中，洛匹那韦/利托那韦与利巴韦林和 IFN- $\alpha$ 2A 联合用药可快速退热、加快病毒清除和延迟生存期<sup>5</sup>。另一例来自希腊的病例中，在 MERS 疾病的第 13 天开始接受洛匹那韦/利托那韦联合 IFN 和利巴韦林治疗，2 天后病毒血症清除，但呼吸道分泌物中病毒核酸持续存在，直至疾病第 4 周，患者最终死亡<sup>11</sup>。

在韩国 MERS 暴发期间，大多数出现呼吸系统疾病的患者接受了由聚乙二醇干扰素 (IFN)-  $\alpha$ 、利巴韦林和洛匹那韦/利托那韦组成的三联抗病毒治疗；然而，缺乏关于这种方法有效性的数据<sup>12</sup>。基于发现以及洛匹那韦/利托那韦和 IFN- $\beta$ 1B 的可用和安全性数据，2015 年日内瓦世界卫生组织召开 MERS 防治大会<sup>13</sup>，认为洛匹那韦/利托那韦联合干扰素治疗具有潜在疗效。

自 2019 年 12 月以来湖北省武汉市多家医院发现不明原因肺炎多例，部分病例核酸和二代测序结果提示为新型冠状病毒感染。鉴于应对此次疫情，无有效抗病毒治疗方案的情况下，国家和当地医疗救治组紧急启动该项研究，旨在评估洛匹那韦/利托那韦和干扰素- $\alpha$ 2b 联合治疗武汉新型冠状病毒感染住院患者的疗效和安全性的随机、开放、空白对照的研究。

## 2.2 潜在风险和获益

### 2.2.1 已知的潜在风险

克力芝临床试验期间与本品治疗相关的最常见的不良反应为腹泻、恶心、呕吐、高甘油三酯血症和高胆固醇血症。每日一次服用本品的患者发生腹泻的风险可能较大。腹泻、恶心和呕吐在治疗开始的时候就可能出现，高甘油三酯血症和高胆固醇血症可能会稍后出现。在 II-IV 期试验中，有 7% 的受试者因在治疗中出现不良事件而导致提前退出研究。

值得注意的是，接受本品治疗的患者中已有发生胰腺炎的报告，包括那些出现了高甘油三酯血症的患者，绝大多数报告病例中，患者系既往有胰腺炎罹患病史和/或与其它可引发胰腺炎的药物进行合并治疗，甘油三酯显著升高是发生胰腺炎的一个危险因素。此外，在本品治疗过程中出现 PR 间期延长的报告极为罕见，如患者存在结构性心脏疾病和原有传导系统异常或者接受可引起 PR 间期延长的药物(如维拉帕米或阿扎那韦)，则在接受洛匹那韦利托那韦后有罕见报道发生 2 度或 3 度房室传导阻滞。

**成人患者在临床研究和上市后使用中发生的不良反应：**频率分级中包括了所有已报告的中度至重度事件，无论是否存在因果关系。根据身体系统器官分类列出了不良反应，在每个频率分组中，不良反应发生频率按降序排列：极常见  $\geq 1/10$ ；常见  $\geq 1/100$ ,  $<1/10$ ；不常见  $\geq 1/1000$ ,  $<1/100$ 。列表如下，

表 1.成人患者在临床研究和上市后使用中发生的不良反应

| 系统器官分类 | 频率  | 不良反应                        |
|--------|-----|-----------------------------|
| 感染和传染病 | 极常见 | 上呼吸道感染                      |
|        | 常见  | 下呼吸道感染，包括蜂窝组织炎、毛囊炎和疖在内的皮肤感染 |

|           |     |                                                 |
|-----------|-----|-------------------------------------------------|
| 血液和淋巴系统异常 | 常见  | 贫血，白细胞减少，嗜中性白血球减少症、淋巴结病                         |
| 免疫系统异常    | 常见  | 过敏反应，包括荨麻疹和血管性水肿                                |
|           | 不常见 | 免疫重建综合征                                         |
| 内分泌异常     | 常见  | 性腺功能减退症                                         |
| 代谢和营养异常   | 常见  | 包括糖尿病在内的血糖异常，高甘油三酯血症，高胆固醇血症，体重下降，食欲减退           |
|           | 不常见 | 体重增加，食欲增强                                       |
| 精神异常      | 常见  | 焦虑                                              |
|           | 不常见 | 梦异常，性欲降低                                        |
| 神经系统异常    | 常见  | 头痛（包括偏头痛），神经病变（包括外周性神经病变），头晕，失眠                 |
|           | 不常见 | 脑血管意外，惊厥，味觉障碍，味觉缺失，震颤                           |
| 眼部异常      | 不常见 | 视觉障碍                                            |
| 耳部和迷路异常   | 不常见 | 耳鸣，眩晕                                           |
| 心脏异常      | 不常见 | 动脉粥样硬化，例如心肌梗死，房室传导阻滞，三尖瓣关闭不全                    |
| 血管系统异常    | 常见  | 高血压                                             |
|           | 不常见 | 深静脉血栓                                           |
| 胃肠功能紊乱    | 极常见 | 腹泻，恶心                                           |
|           | 常见  | 胰腺炎，胃食管反流病，肠胃炎和结肠炎，呕吐，腹痛（上腹和下腹），腹胀，消化不良，痔疮，肠胃气胀 |
|           | 不常见 | 消化道出血，包括胃肠溃疡、十二指肠炎、胃炎和直肠出血，口腔炎和口腔溃疡，大便失禁，便秘，口干  |
| 肝胆异常      | 常见  | 肝炎，包括 AST、ALT 和 GGT 增高                          |
|           | 不常见 | 脂肪肝，肝肿大，胆管炎，高胆红素血症                              |

|              |     |                                                      |
|--------------|-----|------------------------------------------------------|
|              | 不明  | 黄疸                                                   |
| 皮肤和皮下组织异常    | 常见  | 包括面部损毁症在内的获得性脂代谢障碍，包括斐丘疹在内的皮疹，包括湿疹和皮脂溢在内的皮炎/皮疹，盗汗，瘙痒 |
|              | 不常见 | 脱发，毛细血管炎，血管炎                                         |
|              | 不明  | 斯-约综合征，多形性红斑                                         |
| 骨骼肌肉和结缔组织异常  | 常见  | 肌痛，包括关节痛和背部痛在内的骨骼肌肉痛，肌肉异常，例如虚弱和痉挛                    |
|              | 不常见 | 横纹肌溶解，骨坏死                                            |
| 肾脏和泌尿系统异常    | 不常见 | 肌酐清除率下降，肾炎，血尿                                        |
| 生殖系统和乳腺异常    | 常见  | 勃起功能障碍，月经紊乱-闭经，月经过多                                  |
| 全身性异常和用药部位情况 | 常见  | 乏力，包括无力                                              |

备注：给出频率为“不明”的事件在上市后监测中被确认。

重组人干扰素  $\alpha 2b$  注射液（安福隆）

**本品作为口鼻吸入给药方式在动物实验中的见过显示无潜在风险，如下：**

在成都安评中心开展的 rhIFN $\alpha 2b$  注射液(假单胞菌)连续 14d 雾化吸入对 SD 大鼠生理指标以及肺、气管、支气管等组织器官的影响，以考察雾化吸入安全性研究结果显示，雾化质量中位数气动力学粒径为 3.56 $\mu m$ ，几何标准偏差为 1.84 $\mu m$  符合 FDA 经雾化吸入抵达和在下呼吸道沉积的粒径要求。用药 14d、停药后 14d 考察大鼠一般状况、体重及摄食量、血液学及血液生化指标均未见异常；大鼠口腔黏膜、舌、鼻腔（鼻旁窦）、喉、气管、主支气管、肺未见异常组织病理学改变，脑、心脏、肝脏、脾脏、肾脏、生殖系统等所检查的脏器或组织亦均未见异常组织病理学改变。提示大剂量雾化吸入 rhIFN $\alpha 2b$  注射液安全性良好。

**本品在儿童雾化 I 期临床试验中安全性良好显示无潜在风险，如下：**

已经完成的儿童 I 期临床试验：西京医院临床试验机构儿科感染专业组按照国家临床药物试验的批件要求，对  $\alpha$  干扰素注射液在病毒性肺炎恢复期患儿的耐受性及安全性（I 期临床）研究结果表明肌肉注射  $\alpha$  干扰素注射液最大剂量 2.0  $\mu g/kg \cdot 次$  或雾化吸入最大剂量 4.0  $\mu g/kg \cdot 次$ ，应用于 4 个月以上年龄的儿童是安全的，并耐受性好，无严重不良反应发生。

**本品在成人雾化临床试验的无潜在风险，如下：**

国外研究表明<sup>14</sup>，单次雾化后仅在极高剂量（12600 万 IU、21600 万 IU）时才有个别血清中可检测出 rhIFN $\alpha$  2；发热等不良反应与吸入剂量有关：1800 万 IU 雾化剂量可引起 40%出现发热反应 12600 万 IU 时比例提高至 85.7%，但发热是可逆的；部分患者呼吸峰流速短时间内下降超过 15%，但很快就会恢复。在目前推荐的剂量范围（20 万-40 万 IU/kg）内（50kg 成人 1000 万 IU-2000 万 IU/次）雾化吸入 rhIFN $\alpha$ 2 安全性较高，只有极大剂量（约 100 倍于推荐剂量）才会进入血液而出现全身性不良反应。

本品注射液载入说明书（皮下给药）的不良反应为如下：

重组人干扰素  $\alpha$ 2b 注射液常见的不良反应有感冒样症状，如发烧、头痛、寒战、乏力、肌肉酸痛、关节痛等，部分病人可出现厌食、恶心、腹泻、呕吐、白细胞减少、血小板减少、转氨酶增高，停药后即可恢复正常。偶见有失眠、皮疹、脱发、血压升高或降低、耳鸣、视力下降、神经系统功能紊乱等。

不良反应多为一过性和可逆性反应，常出现在用药的第一周，不良反应多在注射 48 小时后消失，如发生中等程度至严重的不良反应，可考虑调整患者的用药剂量或停止用药。一旦发生过敏反应，应立即停止用药。

### 2.3.2 已知的潜在获益

一般说来，对受试者或社会无明确的获益期望。然而，根据既往临床前和某些情况下的临床研究，认为洛匹那韦/利托那韦和 IFN- $\alpha$  2b 可以为个体受试者提供一些潜在获益。因此，尽管潜在受益（如果有）目前尚不清楚，但是可以认为有证据表明干预措施的发病率和死亡率降低高于比支持治疗。从研究中获得的知识将提供重要信息，有助于更好地了解该药物今后临床试验的设计。

## 3 目的与目标

主要目的：

- 评价与标准治疗相比，洛匹那韦/利托那韦和干扰素- $\alpha$ 2b 联合治疗新型冠状病毒感染的成人住院患者的疗效和安全性。

## 4 研究设计和观察终点

### 4.1 研究设计描述

本研究是一项多中心、随机、开放标签、空白对照的多阶段临床研究，由于尚无有效的治疗措施，项目组将根据实际情况，陆续评估可能有效的治疗措施（包括但不限于洛匹那韦/利托那韦和干扰素联合，remdesivir，针对冠状病毒的单/多克隆抗体），探索最为优效的抗病毒治疗方案。



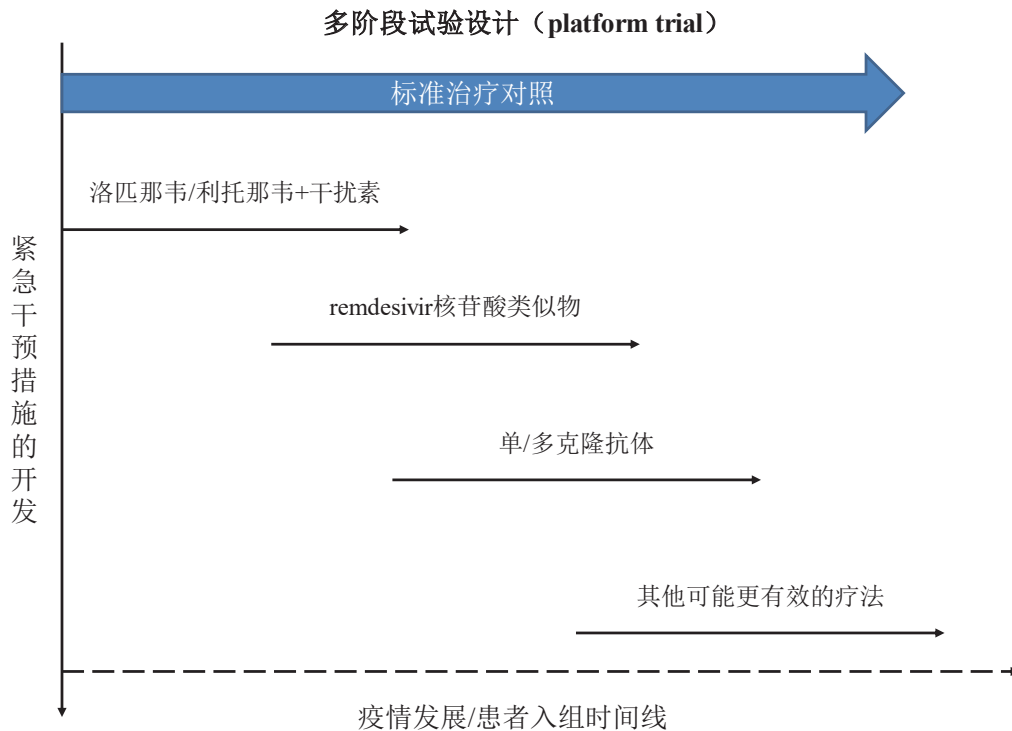

第一阶段将评估，与标准治疗相比，洛匹那韦/利托那韦和 IFN- $\alpha$ 2b 治疗约 160 例（初步估计）诊断为武汉新型冠状病毒感染的的住院成年患者的疗效和安全性。

筛选症状发作 10 天内的新型冠状病毒患者，并在筛选后（不超过 24 小时）尽快随机分配。患者将按 1:1 的比例分配，接受洛匹那韦/利托那韦和 IFN- $\alpha$ 2b 联合治疗组或仅接受标准治疗组。仅允许不符合入选和排除标准的患者重新筛选一次，前提是从症状发作至随机化的时间仍在 10 天内。

本研究计划随机入组约 160 例成年受试者。将根据是否需要无创及更高强度呼吸支持治疗对受试者进行分层，且按照 1:1 的比例随机分组，接受标准治疗或洛匹那韦/利托那韦口服和 IFN- $\alpha$ 2b 吸入每日两次给药治疗，疗程为 14 天。受试者和所有研究中心工作人员不设盲。

## 研究流程图

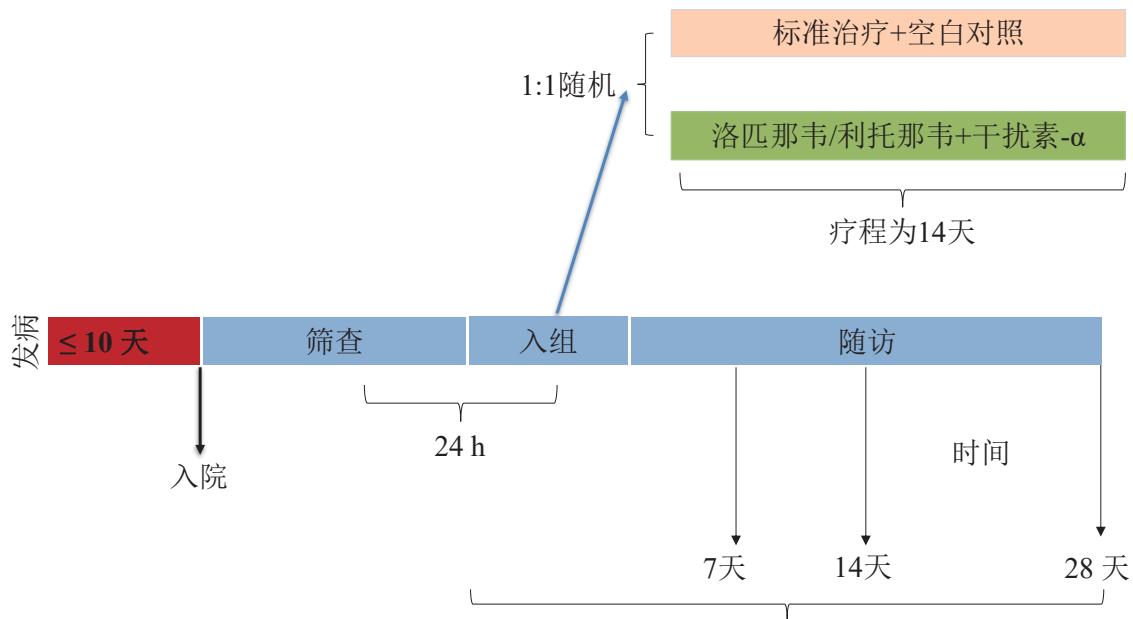

主要终点：随机化后28天临床改善时间；  
次要终点：7/14/28天临床改善率；28天病死率；住院时间等；

## 4.2 研究终点

### 4.2.1 主要终点

**主要终点：**入组 28 天临床改善时间（time to clinical improvement）：随机化后至临床改善的天数。临床改善定义为患者入院状态的 7 分等级量表评分降低 2 分或者出院<sup>16</sup>

7 分等级量表包括：

7 分：死亡；

6 分：住院接受 ECMO 和 / 或机械通气；

5 分：住院接受无创通气和 / 或高流量氧疗；

4 分：住院接受氧疗；

3 分：住院不需要接受氧疗；

2 分：出院但未恢复正常功能状态；

1 分：出院已恢复正常功能状态。

#### 4.2.2 次要终点

1. 关键次要终点为至临床改善的时间（TTCI），定义为至出院的时间或至国家早期预警评分 2（NEWS2） $\leq 2$  且维持 24 小时的时间，以先发生者为准。该终点将提供患者病情改善的客观证据，可能是总体临床状态改善的合理替代指标。
2. 随机后第 7、14 和 28 天，7 分等级量表各分类的患者比例；
3. 第 28 天病死率；
4. 机械通气持续时间（天）；
5. 氧疗持续时间（天）；
6. 住院持续时间（天）；
7. 开始治疗后第 7 天，上和 / 或下呼吸道样本新型冠状病毒 RT-PCR 阴性的患者比例；
8. 上和 / 或下呼吸道样本（第 7 天）病毒 PCR 转阴的时间（天）；
9. 严重药物不良事件频率；

## 5 研究入组与退出

### 5.1 受试者入选标准

入选标准

1. 成人（定义为年龄 $\geq 18$  岁）
2. 在尚未开发出快速诊断试剂盒情况下，经过临床诊断的不明原因病毒性肺炎患者；或经过 PCR 确证的新型冠状病毒感染患者。
3. 症状发作与随机入组之间的时间间隔在 10 天以内，症状发作主要以发热作为判定依据，若无发热可使用咳嗽或其他相关症状。

4. 静息未吸氧状态下，患者  $SPO_2 \leq 94\%$ ，或氧合指数小于 300mmHg。

## 5.2 受试者排除标准

### 排除标准

1. 任何不能让方案安全进行的情况；
2. 已知患者自杀意念（IFN- $\alpha$  2b 禁忌）；
3. 对洛匹那韦/利托那韦或重组 IFN- $\alpha$ 2b 的已知过敏或超敏反应；
4. 谷丙转氨酶 (ALT)/谷草转氨酶升高超过正常上限 5 倍；
5. 禁用于洛匹那韦/利托那韦治疗且在研究期间不能更换或停用的药物，例如 CYP3A 抑制剂；
6. 妊娠：育龄女性妊娠试验阳性；
7. 已知 HIV 感染，因为担心如果未与其他抗 HIV 药物联合使用，会对洛匹那韦/利托那韦产生耐药性；
8. 患者可能在 72h 内转至非参与医院。

## 5.3 招募和保留策略

患者将在收治不明原因的病毒学肺炎的医院进行筛选。图 1.表示筛选过程。

## 5.4 受试者退出或终止试验

### 5.4.1 退出或终止的原因

研究者应尽可能促成每一个受试者完成整个研究过程。受试者可能因为任何原因从本研究中退出，**试验用药物停药的标准：**

- 1) 出现严重的或者不可耐受的不良事件，同时研究者判断受试者因为该不良事件需要退出本研究。
  - 药物不耐受或不可接受的 AE。
  - 没有强有力的证据表明 AE 与试验用药物不相关的任何 4 级 AE 或毒性。
  - 研究者认为具有有临床意义的实验室检查结果提示需要停止使用研究药物。

- 类过敏反应（包括口咽水肿、严重皮疹和速发型过敏反应）：受试者必须永久停用试验用药物，并采取适当的治疗。
- 支气管痉挛：任何发生支气管痉挛的受试者必须永久停用试验用药物，并进行适当临床管理。
- 肝脏化学停止的标准定义如下：
  - a. ALT $\geq$ 3 x ULN 和胆红素 $\geq$ 2 x ULN (>35%直接胆红素)

注：如果 ALT $\geq$ 3 x ULN 和胆红素 $\geq$ 2 x ULN，无法立即进行血清胆红素分离，则应停用研究药物。如果检测可用，则应进行血清胆红素分离。如果检测不可用，则在试纸上检测尿胆红素，阳性表明直接胆红素升高并提示出现肝损伤。

- b. ALT  $\geq$  5xULN。
- c. ALT $\geq$ 3 x ULN，如果与出现肝炎或超敏反应症状或症状恶化相关，如疲乏、恶心、呕吐、右上腹痛或压痛、发热、皮疹或嗜酸性粒细胞增多。

2) 研究者要求退出研究。

3) 当患者出现急性肾损伤需要接受肾脏替代治疗如下：

如果在干预组未接受 CRRT 治疗，肌酐清除率下降至 $\leq$ 10 mL/min，则应停止试验用药物给药，并对受试者进行随访或退出研究。但是，对于已经完成随机后的 14 天治疗，期间未接受 CRRT 且肌酐清除率下降至 $\leq$ 10 mL/min 的受试者，无需退出研究。

4) 研究者还可以根据具体情况决定受试者是否退出研究。

一旦受试者退出研究，研究者应该尽快通知监察单位或者组长单位，并尽最大努力完成退出前的评估。所有因不良事件退出研究的受试者，应该随访直至不良事件完全缓解，经过研究者判断不良事件已经处于稳定期或者失访。对于所有退出研究的受试者，应该在 CRF 表格上详细记录退出日期和退出原因等。

#### 5.4.2 受试者撤回或终止研究的处理

受试者可以在任何时间终止参与研究，且不会受到偏见。如果受试者终止研究，则将此原因记录于纸质 CRF。如果受试者未完成 7 天的随机化治疗，则认为受试者提前停用试验用药物。如果受试者提前终止试验用药物，研究者必须尽力完成所有剩余的研究访视，如时间和事件表所述，包括随机化后 28 天的末次访视。

负责患者护理的临床医生也可以让患者随时退出试验。根据主治临床医生的判断，如果患者退出试验治疗，则将接受常规治疗。在这种情况下，患者仍在试验内，以进行随访和数据分析。如果患者希望退出试验治疗，研究中心应该解释留在研究中对试验随访的重要性，或如果做不到则允许将常规随访数据用于试验目的，及允许使用现有采集的数据。

## 6 研究药物

### 6.1 研究药物

#### 6.1.1 药品

克力芝（洛匹那韦/利托那韦）2 片 BID 通过口服给药，对于无法吞咽的患者通过胃管给予洛匹那韦/利托那韦（洛匹那韦 400 mg/100 mg 利托那韦）5 mL 混悬液。

IFN- $\alpha$ 2b 注射液（安福隆）主要成分：重组人干扰素  $\alpha$ 2b，将按照 500 万 iu，bid 的治疗方案雾化吸入使用。

本次研究采取开放标签的，空白对照设计。因此，仅有干预组将会接受在标准治疗的基础上添加联合抗病毒治疗。

#### 6.1.2 产品储存和稳定性

在正常处理和给药条件下，试验用药物预期不会给研究中心工作人员带来显著的安全性风险。试验用药（克力芝）必须在温度 30°C（87°F）以下的适当物理条件下储存于安全区域。试验用药物的获取和给药将仅限于研究者或指定人员。试验用药物必须仅分发给或给予入组研究且符合方案的受试者。

根据标准规程和产品说明书，吸入 IFN- $\alpha$  2b 将在 2–8°C 避光条件下储存在药房的安全区域。

#### 6.1.3 药物制备

对于能够吞咽完整片剂的受试者，研究护士应将研究药物的确切剂量分配给患者并监测用药过程。

对于无法吞咽完整片剂的受试者，研究护士可将药品研磨并将研磨物倾倒在适量的加温水中。应搅拌混合物，且受试者需口服全部混合物。

#### 6.1.4 用量用法

受试者将被随机分配至以下任一治疗组。

| 组别  | 剂量与给药间隔                                                    |                                                     |
|-----|------------------------------------------------------------|-----------------------------------------------------|
| A 组 | 标准治疗+洛匹那韦/利托那韦（400 mg 洛匹那韦 /100 mg 利托那韦），每 12h 一次，持续 14 天。 | 标准治疗+干扰素 $\alpha$ 2b 雾化吸入，剂量为 500 万 iu, bid。连续 14 天 |
| B 组 | 标准治疗                                                       | 标准治疗                                                |

#### 6.1.5 治疗持续时间

随机化治疗持续时间为 14 天。如果患者在 14 天内出院回家，则将停用联合抗病毒治疗。

#### 6.1.6 剂量跟踪

研究中心的护理人员将给予研究药物并填写药物治疗日志。任何遗漏的研究药物都将记录在电子病例报告表（纸质 CRF）中，以监测治疗依从性。

### 6.2 研究药物清点程序

研究者指定的研究中心工作人员或医疗机构负责人将保存准确和充分的记录，包括接收日期、批号 / 失效日期、药物运输数量以及研究药物分发和返还的日期和数量。在研究结束时，经项目组同意，按照研究中心销毁程序与医院废物管理政策，在研究中心销毁未经分配、未使用和使用的研究药物。将保存销毁记录。

## 7 研究程序和时间表

### 7.1 研究程序 / 评价

#### 7.1.1 研究特殊流程

1.由于本次疾病为新发突发呼吸道传染病，在尚未研发出快速诊断试剂盒的情况下，将有临床医生判定患者是否符合临床诊断标准。若经过临床医生判定患者符合疾病定义，可考虑纳入本研究。

### 7.1.2 标准治疗研究程序

除抗病毒药外，两个研究组的患者将接受标准支持性治疗（例如，根据每日基础需求口服或肠外营养、下肢深静脉血栓预防、抗生素治疗、辅助氧气或机械通气等），由治疗团队酌情决定。将向治疗团队提供与最佳临床实践和国家卫健委制定的《不明原因的病毒性肺炎诊疗方案（试行）》一致的现行标准治疗建议。

## 7.2 实验室程序 / 评价

### 7.2.1 临床实验室评价

#### 临床安全性实验室检查

参见评价时间表（表 1）。应在住院期间进行检测，此后，根据临床指征，额外进行检测：

- CBC 分类
- 肾功能检查=肌酐、氯化物、肌酐、血糖、尿素氮、尿酸、钾、钠
- 肝功能检查=AST、ALT、白蛋白，肌酸激酶、乳酸脱氢酶、总胆红素、碱性磷酸酶
- 凝血常规：APTT，PT，INR

### 7.2.2 其他检测或程序

在有条件的研究中心，所有患者均进行微生物学筛查，包括痰培养，两套血液培养，和尿抗原的肺炎链球菌、肺炎支原体和肺军团菌。用快速免疫法检测尿中的肺炎链球菌抗原。呼吸系统感染微生物学评估也可以使用其他标本包括胸水、气管内吸出物（预定阈值  $10^5$  cfu / 毫升）和支气管镜定量培养和支气管肺泡灌洗（预定义阈值  $10^4$  cfu / 毫升）等，但该部分内容不作为强制要求，根据各研究中心具体诊疗情况而定。

在抗菌药物治疗开始前，采集痰液和血液进行细菌培养。在入院后 24 小时内获得肺炎链球菌、肺炎支原体和军团菌抗原检测的尿样。

### 7.2.3 样本制备、处理和储存

密封的呼吸道标本将保存在 $-80^{\circ}\text{C}$ 冰箱。将仅用唯一的研究代码标记样本。将样本储存并定期运送至中心实验室。



## 7.2.4 样本运输

鼻咽拭子和下呼吸道样本（如有）将在研究中心冷冻储存，并用干冰运送至规定检测机构。有关病毒学样本的制备和储存的其他说明，包括贴标和运输，将严格按照武汉市卫健委下发《不明原因的病毒性肺炎病毒学检测样本管理方案》执行。样本将在暂于研究中心冷冻储存，直至分析或按需要调配至其他处。

## 7.2.5 样本的预期用途

根据研究方案收集的样本和数据将用于确定干预药物的安全性、抗病毒作用、毒抗体的产生、对免疫反应的影响以及药代动力学。病毒特定的检测项目包括：病毒定性和定量

## 7.3 研究时间表

### 7.3.1 筛选

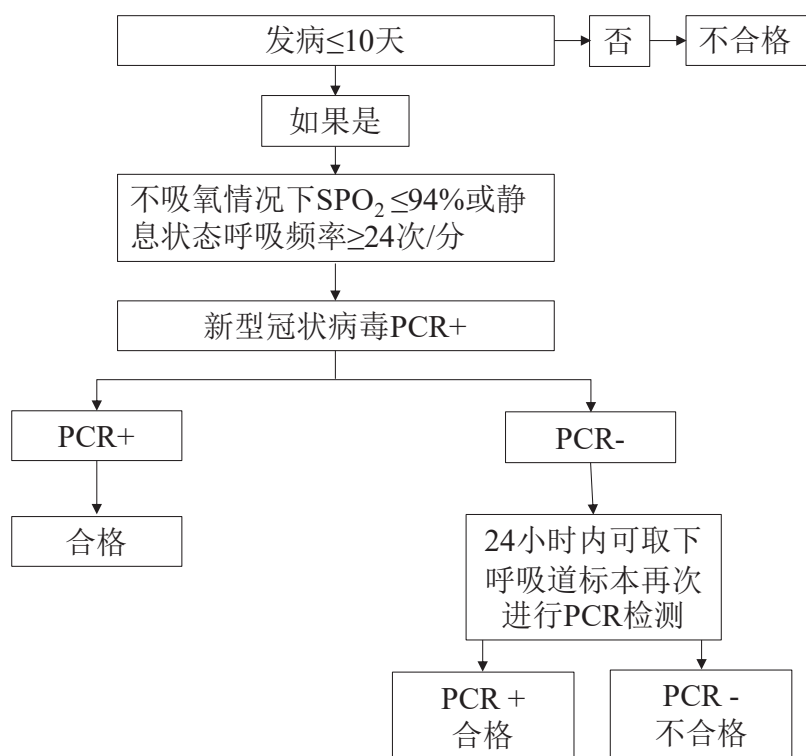

34

图 1.筛选流程。

筛选标准为：

- 症状发作时间 ≤ 10 天

且

- 入院时，室内空气氧饱和度 < 94%。

当地临床医生根据在方案中规定的入选 / 排除标准，每天对患者进行前瞻性筛选。每个主要研究者（PI）必须保留筛选日志，只要符合入排标准的新型冠状病毒感染患者必须记录在筛选日志中，并由研究者或指定人员填写。如果在符合入排标准但未招募患者，也必须在筛选日志上记录未入组试验的原因。

筛选失败定义为受试者签署知情同意参加本研究，但是后续随机过程前即退出研究。以下信息需要记录在 CRF 表格中：知情同意日期，患者基本状况信息，入排标准的违背详细信息，筛选失败的原因，任何可能导致筛选失败的不良和严重不良事件。

### 7.3.2 入组 / 基线

一旦确认入选和排除标准，每家参与中心将通知协调中心进行随机化过程。应尽快（<12 小时）进行研究入组，根据记载的入选标准，可接受的最长时间为 24 小时。

#### 人口学资料

应从受试者或相关人员获取并记录的以下信息：（年龄、性别、种族和人种）

#### 第 0 天

##### 基线评价

##### 病史

应记录以下信息：

- 当前症状：包括发热、咽喉痛、咳嗽、疲乏、虚弱、头晕、意识模糊、头痛、肌痛、呕吐、腹泻、症状、腹痛、胸痛、呼吸困难等。

##### 临床数据

- 生命体征（体温、心率、呼吸速率、血压），氧饱和度（如可能）
- 体重（实际或估计） / 身高
- 每天 NEWS2 评分较基线的变化

- 每天 7 分等级量表评分

### 基线实验室检查

将进行以下检查并记录为基线测定值（如可能）。基线实验室检查应在研究入组后 24 小时内进行（随机化）。

基线实验室：

- CBC 分类。
- 肾功能检查=肌酐、氯化物、肌酐、血糖、尿素氮、钾、钠和尿酸。
- 肝功能检查=AST、ALT、白蛋白、肌酸激酶、乳酸脱氢酶、总胆红素、碱性磷酸酶。
- 凝血常规：APTT，PT，INR
- 动脉血气分析（必要时）

---

### 7.3.3 随访

在评价时间表中概述了研究药物给药计划、临床评估和实验室监测。

主要结局的随访将直至死亡或随机化后 28 天，以先发生者为准。将记录第 28 天的生命状态、ICU 住院时间、住院时间、死亡日期和死亡原因（如适用）。

与评估相关的详细信息如下所示：

#### 随访日常评估和优化的支持治疗

将包括以下文件：

- 根据随访表格在每天的 9 点评估 7 分等级量表
- 目前的症状或状况
- 生命体征
- 接受的最佳支持治疗（有创机械通气、CRRT、ECMO 和营养支持记录）
- 研究药物给药（如适用）
- 实验室（酌情开展）
- 任何严重不良事件
- 出院 / 结局信息（如适用）

---

### 7.3.4 最终研究访视

本研究的主要终点是入院 28 天临床改善时间（time to clinical improve）：随机化后至临床改善的天数。因此，第 28 天访视对于该终点需要的数据至关重要。应尽一切努力确保及时完成本研究访视。首次给药后 28±3 天进行最终评估，仅涉及临床评估。

此外，出院当天将达到出院标准，将根据卫健委《不明原因的病毒性肺炎诊疗方案（试行）》执行。对于已经出院的患者，可以通过电话与使用问卷（如适用）进行最终评估。

---

### 7.3.5 提前退出访视

- 研究药物相关严重不良事件
- 出院；
- 死亡；
- 患者退出或患者退出研究的相关要求；
- 根据临床医生的决定，应该出于安全性原因停用研究药物

## 7.3.6 事件时间表

表 1

| 程序                   | 基线  | 给药期间 |    |    |    |     |     | 随访期 |     | 长期随<br>访 |
|----------------------|-----|------|----|----|----|-----|-----|-----|-----|----------|
|                      | B/L | D1   | D3 | D5 | D7 | D10 | D14 | D21 | D28 | 半年后      |
| 入选 / 排除标准            | X   |      |    |    |    |     |     |     |     |          |
| 书面知情同意               | X   |      |    |    |    |     |     |     |     |          |
| 受试者人口学               | X   |      |    |    |    |     |     |     |     |          |
| 慢性基础疾病评估             | X   |      |    |    |    |     |     |     |     |          |
| 疗效/安全性评估             |     |      |    |    |    |     |     |     |     |          |
| 心电图                  | X   |      |    |    |    |     | X   |     |     |          |
| 胸部影像学检查 <sup>a</sup> | X   |      |    |    |    |     |     | X   |     | X        |
| 并发症记录                | X   | X    | X  | X  | X  | X   | X   | X   | X   | X        |

|                                        |   |   |   |   |   |        |   |   |   |   |
|----------------------------------------|---|---|---|---|---|--------|---|---|---|---|
| 生命体征（体温、心率、血压、呼吸速率、氧饱和度等） <sup>b</sup> | X | X | X | X | X | X      | X | X | X | X |
| NEWS2 评分 <sup>c</sup>                  | X | X | X | X | X | X      | X | X | X | X |
| 患者入院状态的 7 分等级量表评分                      | X | X | X | X | X | X      | X | X | X | X |
| <b>实验室评估</b>                           |   |   |   |   |   |        |   |   |   |   |
| 诊断（临床诊断或病原诊断）                          | X |   |   |   |   |        |   |   |   |   |
| 合并感染的全面微生物学评估（采集时间）                    | X |   |   |   |   |        |   |   |   |   |
| 全血细胞计数（采集时间）                           | X |   |   | X |   |        |   | X |   |   |
| 凝血常规（采集时间）                             | X |   |   | X |   |        |   | X |   |   |
| 肾脏和肝功能检查 <sup>d</sup> （采集时间）           | X |   |   | X |   |        |   | X |   |   |
| 鼻咽拭子样本 <sup>e</sup>                    | X | X | X | X | X | X      | X | X | X |   |
| 下呼吸道标本（痰液/气管内吸出物/balf） <sup>f</sup>    | X | X | X | X | X | X      | X | X | X |   |
| 血浆标本                                   | X |   | X |   | X | X（必要时） |   |   |   |   |

|        |   |   |   |   |   |   |   |   |   |  |
|--------|---|---|---|---|---|---|---|---|---|--|
| 试验用药物  |   |   |   |   |   |   |   |   |   |  |
| 研究药物给药 |   | X | X | X | X | X | X | X | X |  |
| 合并用药   | X | X | X | X | X | X | X | X | X |  |
| 不良事件   | X | X | X | X | X | X | X | X | X |  |

28 天的随访期包括临床、病毒学 and 安全性评估。在患者住院期间进行日常评估，如果患者在 28 天时已经出院，则进行电话访视。

- a. 如适用，在纸质 CRF 中记录基线后 48 小时内接受的任何胸部影像学检查结果。该评估不具有强制性。
- b. 治疗期间 / 住院期间，每天 2 次评估生命体征和通气状态。
- c. 治疗期间 / 住院期间，根据随访随访表格早上 8-9 点一次评估新评分，部分患者 day 1 天入组时已经是下午或者傍晚，当天生命体征和评分等数据采集给药前即可，如果患者已经出院则无需评估。

NEWS2 评分表

| Physiological parameter        | Score |        |           |                     |                 |                 |               |
|--------------------------------|-------|--------|-----------|---------------------|-----------------|-----------------|---------------|
|                                | 3     | 2      | 1         | 0                   | 1               | 2               | 3             |
| Respiration rate (per minute)  | ≤8    |        | 9–11      | 12–20               |                 | 21–24           | ≥25           |
| SpO <sub>2</sub> Scale 1 (%)   | ≤91   | 92–93  | 94–95     | ≤96                 |                 |                 |               |
| SpO <sub>2</sub> Scale 2 (%)   | ≤83   | 84–85  | 86–87     | 88–92<br>≤93 on air | 93–94 on oxygen | 95–96 on oxygen | ≥97 on oxygen |
| Air or oxygen?                 |       | Oxygen |           | Air                 |                 |                 |               |
| Systolic blood pressure (mmHg) | ≤90   | 91–100 | 101–110   | 111–219             |                 |                 | ≥220          |
| Pulse (per minute)             | ≤40   |        | 41–50     | 51–90               | 91–110          | 111–130         | ≥131          |
| Consciousness                  |       |        |           | Alert               |                 |                 | CVPU          |
| Temperature (°C)               | ≤35.0 |        | 35.1–36.0 | 36.1–38.0           | 38.1–39.0       | ≥39.1           |               |

d. 肾功能检查：肌酐，血糖，尿素，尿酸，血清钾和钠。肝功能检查：AST，ALT，白蛋白，碱性磷酸酶，肌酸激酶，乳酸脱氢酶，总胆红素，血脂

e. 基线 / 第 1 天至第 7 天每天采集鼻咽拭子标本。

f. 基线 / 第 1 天至第 7 天每天采集下呼吸道标本，仅针对未接受气管插管的患者。

BALF，支气管肺泡灌洗；BP，血压；CrCl，肌酐清除率；ECG，心电图；纸质 CRF，电子病例报告表；HR，心率；IP，试验用药物；IV，静脉。



## 7.4 合并药物、治疗和程序

主治医生可酌情决定支持治疗和合并治疗。

将汇总以下合并治疗，如：

抗菌药物（如适用）

扑热息痛（如适用）

白蛋白（如适用）

神经肌肉阻滞剂（如适用）

氧疗（鼻插管、肺保护性机械通气、ECMO 等）

肾脏替代治疗（如适用）

正性肌力药和血管加压药（如适用）

悬浮红细胞和血浆输注（如适用）

### 7.4.1 需要注意的药物、治疗和程序

克力芝和吸入干扰素  $\alpha 2b$  是国家食品药品监督管理局已经批准上市药物。重组人干扰素  $\alpha 2b$  注射液改变用药途径给药，前期动物及部分临床试验中已证实其安全性及有效性。研究排除标准确保排除可能会发生药物相关不良反应的患者。将在患者中监测克力芝和重组人干扰素  $\alpha 2b$  注射液的已知副作用。在本研究培训后，主治临床医生应了解研究药物产品信息中的列出的注意事项和潜在不良反应。**注意和以下药物同时使用，可考虑使用替代药物。**

表. 洛匹那韦/利托那韦与重症监护室常用药物的相互作用

| 药物  | 可能的相互作用                                     | 管理     | 入组时采取的措施               | 入组之后的措施                                                                  |
|-----|---------------------------------------------|--------|------------------------|--------------------------------------------------------------------------|
| 胺碘酮 | 增加胺碘酮毒性的风险（低血压、心动过缓、窦性停搏）。<br><br>QT 间期延长增加 | 禁忌同时使用 | 在入选时，没有其他选择的胺碘酮治疗是排除标准 | 考虑替代胺碘酮。<br><br>如果没有胺碘酮的替代选择，考虑减少剂量。<br><br>监测血清中胺碘酮浓度是否升高，肝功能检查结果是否发生变化 |

|        |                                                         |                                                                    |                                                             |                                                                                                                        |
|--------|---------------------------------------------------------|--------------------------------------------------------------------|-------------------------------------------------------------|------------------------------------------------------------------------------------------------------------------------|
| 芬太尼    | 同时使用芬太尼与 CYP3A4 抑制剂可能导致芬太尼毒性风险升高，导致致死性呼吸抑制。             | 在非机械通气患者中，禁忌同时使用。<br><br>对于机械通气的患者，避免使用芬太尼或减少剂量                    | 考虑替代芬太尼。<br><br>使用低剂量并调整剂量以达到目标镇痛和镇静作用                      | 考虑替代芬太尼。<br><br>使用低剂量并调整剂量以达到目标镇痛和镇静作用                                                                                 |
| 1) 氟康唑 | 利托那韦暴露量增加和 QT 间期延长风险                                    | 尽可能避免伴随用药<br><br>如果需要氟康唑，密切监测心电图是否出现 QT 间期延长                       | 使用氟康唑的替代品                                                   | 使用氟康唑的替代品。<br><br>氟康唑介导的 CYP3A4 抑制可能在停药后持续 4-5 天，因为其半衰期长                                                               |
| 咪达唑仑   | 咪达唑仑血浆浓度升高，可导致咪达唑仑毒性                                    | 在非机械通气患者中，禁忌同时使用。<br><br>在机械通气患者中，尽可能避免使用咪达唑仑。必要时，减少咪达唑仑的剂量并监测不良反应 | 考虑咪达唑仑的替代品。<br><br>使用较低剂量并调整剂量以达到目标镇静作用                     | 考虑咪达唑仑的替代品。<br><br>使用较低剂量并调整剂量以达到目标镇静作用。<br><br>如果需要同时使用咪达唑仑和洛匹那韦/利托那韦，密切监测患者是否出现咪达唑仑不良作用（过度镇静、意识模糊和呼吸抑制），并考虑减少咪达唑仑的剂量 |
| 奎硫平    | QT 间期延长的风险增加，尖端扭转性室性心动过速或其他明显的室性快速性心律失常                 | 禁忌伴随给药                                                             | 使用喹硫平的替代药物                                                  | 使用喹硫平的替代药物。如果需要合并用药，将喹硫平的剂量降低至标准剂量的六分之一，当停用洛匹那韦/利托那韦，随后应将喹硫平的剂量增加至标准剂量。                                                |
| 利福平    | 降低洛匹那韦/利托那韦的血浆浓度。<br><br>利福平可能增强洛匹那韦的毒性作用，特别是增加肝细胞毒性的风险 | 禁忌同时使用                                                             | 如果需要合并用药，建议利福布丁 150 mg，隔日 1 次或 150 mg，每周 3 次与洛匹那韦/利托那韦合并用药。 | 如果需要合并用药，建议利福布丁 150 mg，隔日 1 次或 150 mg，每周 3 次与洛匹那韦/利托那韦合并用药。                                                            |
| 西地那非   | 增加西地那非血浆水平，从而增加西地那非不良反应的风险（低血压、视觉变化和阴茎异常勃起）             | 禁忌同时使用洛匹那韦/利托那韦和西地那非                                               | 如果可能，停用西地那非。如果不可能，使用西地那非是本研究的排除标准                           | 请勿使用西地那非                                                                                                               |

|       |                                |                       |                                                          |                                                                                           |
|-------|--------------------------------|-----------------------|----------------------------------------------------------|-------------------------------------------------------------------------------------------|
| 辛伐他汀  | 肌病或横纹肌溶解风险增加                   | 禁忌洛匹那韦/利托那韦与辛伐他汀合并用药  | 如果可能，停止辛伐他汀。如果需要的话，考虑氟伐他汀、匹伐他汀或普伐他汀作为替代治疗，因为这些药物的治疗潜力最小。 | 不要使用辛伐他汀。如果需要，考虑氟伐他汀、匹伐他汀或普伐他汀作为替代治疗，因为这些药物的可能性最小                                         |
|       |                                |                       | 相互作用                                                     | 用于交互                                                                                      |
| 阿托伐他汀 | 阿托伐他汀 AUC 增加 488%。肌病或横纹肌溶解风险增加 | 监测阿托伐他汀毒性体征（横纹肌溶解和肌病） | 考虑停用阿托伐他汀。如果不能停药，应慎用于给药范围的下限（每天 10-40 mg）                | 考虑其他药物（普伐他汀、氟伐他汀或瑞舒伐他汀），因为这些药物的相互作用可能性最小                                                  |
| 伏立康唑  | 伏立康唑血浆浓度降低，伏立康唑疗效下降            | 禁忌伴随给药                | 使用伏立康唑的替代药物。如果没有其他选择，伏立康唑用药是本研究的排除标准                     | 使用伏立康唑的替代药物或在治疗药物监测下使用。可能需要增加伏立康唑的剂量。如果没有其他选择，停用洛匹那韦/利托那韦，继续使用 IFN-β1b。<br>考虑其他抗真菌药治疗曲霉菌病 |
| 苯妥英钠  | 苯妥英和利托那韦的血浆浓度可能降低              | 慎用                    | 慎用                                                       | 在同时给药过程中，监测苯妥英浓度。可能需要调整苯妥英或磷苯妥英的剂量                                                        |

本表中的信息来自词汇表 (<http://www.wolterskluwer.com/词典在线/>) 和 Micromedex (<https://www.micromedexsolutions.com/家庭/调度>)。缩略词：AUC（接收器工作特征）曲线下面积，cyp3a4 细胞色素 P450-3A4

## 7.5 慎用药物、治疗和程序

- 1) 大剂量糖皮质激素治疗新型冠状病毒。高剂量皮质类固醇定义为泼尼松龙超过 50 mg / 天、氢化可的松超过 200 mg / 天、甲泼尼龙超过 40 mg / 天。允许使用大剂量糖皮质激素治疗其他疾病（如感染性休克等）。
- 2) 中药：具有缓解或者抗病毒作用效果的中药

## 7.6 急救药物、治疗和程序

如果在 14 天的疗程内，患者出现顽固性低氧血症，需要使用 ECMO；没有使用 ECMO 经验的中心可将患者转入到具有较高 ECMO 水平的中心；如果接受 ECMO 治疗，需要详细记录 ECMO 的参数和运行情况。

## 7.7 研究关闭后受试者的研究药物获取

在完成 14 天疗程后，受试者将不再获得研究所提供药物。

# 8 安全性评估

## 8.1 安全性参数质量标准

| 术语            | 定义                                                                               |
|---------------|----------------------------------------------------------------------------------|
| 不良事件 (AE)     | 患者或临床试验受试者给药后出现的任何不利医学事件,与本治疗不一定存在因果关系。                                          |
| 不良反应 (AR)     | 与给予任何剂量的研究性药物相关的任何不良和非预期反应。                                                      |
| 非预期不良反应 (UAR) | 是指其性质或严重程度与可用产品信息 (例如, 未批准试验用药物的研究者手册, 或已批准药物的产品特征概要) 不符的不良反应, 或根据药物特性预料不到的不良反应。 |

|                                                      |                                                                                                                            |
|------------------------------------------------------|----------------------------------------------------------------------------------------------------------------------------|
| <b>严重不良事件 (SAE)、严重不良反应 (SAR)、疑似非预期严重不良反应 (SUSAR)</b> | 严重不良事件、不良反应或非预期严重不良反应分别为：a) 导致死亡；b) 危及生命；c) 需要住院治疗或延长现有住院时间；d) 导致持续性或严重残疾或失能；e) 是先天性畸形或出生缺陷；f) 是携带真实、非假设、上述结局之一的任何其他重要医学事件 |
|------------------------------------------------------|----------------------------------------------------------------------------------------------------------------------------|

### 8.1.1 不良事件 (AE) 的定义

不良事件是人类受试者发生的任何不良或不利的医学事件，包括与受试者参加研究存在时间关联的任何异常体征（例如，异常体格检查或实验室检查结果）、症状或疾病，无论是否认为与研究相关。

### 8.1.2 严重不良事件 (SAE) 的定义

严重不良事件的定义为符合下列标准的任何不良医学事件：

- 导致死亡
- 危及生命
- 需要患者住院或延长已住院患者的住院时间
- 导致持续性或严重残疾 / 失能
- 属于先天性异常 / 出生缺陷

### 8.1.3 非预期问题 (UP) 的定义

非预期问题是在性质、严重程度或频率方面与 IRB 批准的研究方案和知情同意文件中描述的研究风险有关的任何非预期事件、事情、经验或结局；研究者手册或其他研究文件；正接受研究的受试者人群特征（新型冠状病毒感染患者）；可能、很可能或肯定与参加研究相关；带给受试者或其他人的危害风险高于既往已知或公认的风险（包括身体、心理、经济或社会危害）。

## 8.2 不良事件分类

### 8.2.1 事件严重程度

研究者将根据分级成人和儿童不良事件的 CTCAE 表（版本 4.0），对每起 AE 的严重程度进行分级，见于：

<http://www.niaid.nih.gov/labsandresources/resources/daidscinrsrch/documents/daidsaegradingtable.pdf>

严重性:

各个中心的主要研究者或者授权者需要根据以下等级相应的评估每个 AE 的严重程度:

1 = 轻度

2 = 中度

3 = 重度

4 = 危及生命

5 = 死亡

---

### 8.2.2 与研究药物的关系

不良事件与给药的关系:

**绝对不相关:** 与研究药物无关, 与其他因素, 如原发性病、并发症或其他药物给药相关。

**可能无关:** 与研究药物无明确的关系, 可能与其他因素, 如原发性病、并发症或其他药物给药相关。

**可能相关:** 与研究药物明确相关, 高度疑似与研究药物有关, 但不能排除与其他因素 (如原发性病、并发症或其他药物给药) 之间的关系。

**非常可能相关:** 与研究药物明确相关, 且可排除与其他因素 (如原发性病、并发症或其他药物给药) 之间的关系。

**高度相关:** 与研究药物明确相关, 可排除与其他因素 (如原病、并发症或其他药物给药) 之间的关系, 重新使用研究药物后再次出现不良事件。

上述最后 3 种事件应按照与研究药物相关的不良反应进行处理。

---

### 8.2.3 可预期的严重不良事件

各个中心的主要研究者或者授权者需要对每个严重不良事件 (SAE) 判定是否为预期或者非预期, 无论该 SAE 是否与研究操作有关。列举在表格 2 中的 SAE 为预期严重不良事件

**表格 2**

| 预期严重不良事件                          | n (%) |
|-----------------------------------|-------|
| 共感染（包括细菌和真菌，入院 48 小时内送检标本培养出的致病菌） |       |
| 继发感染（超过 48 小时，培养出的致病菌）            |       |
| 急性呼吸窘迫综合症                         |       |
| 感染性休克                             |       |
| 急性肾损伤                             |       |
| 急性心肌梗死                            |       |
| 急性心力衰竭                            |       |
| 水电解质酸碱平衡紊乱                        |       |
| 急性肺栓塞                             |       |
| 急性肝损伤                             |       |
| 病毒性心肌炎                            |       |
| 横纹肌溶解                             |       |
| 侵入性的重症支持治疗相关并发症（导管相关血流感染等）        |       |

#### 非预期严重不良事件

如果出现致死或危及生命的严重不良事件不在表格 2 中所列，则为非预期的严重不良事件。

### 8.3 事件评估和随访的时间期限和频率

从患者同意参加该研究至随访第 28 天，研究者或授权人员负责发现、记录和报告符合 AE 或 SAE 定义的事件。

必须持续随访所有 SAE 直至消退。如果在提交初始报告时 SAE 尚未消退，PI 或其他授权的研究中心研究者必须提供 SAE 随访报告。

将在与上述 AE 相同的时间段内采集 SAE。但是，任何经评估与参加研究**相关**或与合并药物相关的 SAE。所有 SAE 将在 24 小时内向**协调中心（武汉市金银潭医院或者项目组）**报告。

## 8.4 报告程序

### 8.4.1 不良事件报告

参加试验的严重冠状病毒患者多合并 ARDS，其基线死亡率很高。因此，患者发生 AE 的风险增加。预计会发生许多此类事件可能与患者的病情和相应的治疗相关，而可能与试验无关。因此很多作为原发疾病过程的自然史或危重疾病的预期并发症的一部分的事件已经被纸质 CRF 采集

已定义并作为并发症和研究终点的事件（如入住 ICU，需要机械通气/ ECMO 和死亡）等信息不会被作为不良事件或 SAE 单独报告，除非经过研究者判断，它们被认为与研究干预有因果关系或者是其他考虑。

异常实验室检查结果（例如：血液学、临床生化，或尿分析），经研究者判断认为具有临床意义，与疾病进展关系不大，均应记录为 AE 或 SAE。但是，与基础疾病有关的任何具有临床意义的安全性评估，除非研究者判定为受试者病情比预期的更严重，则**不会**报告为 AE 或 SAE。预期的严重不良时间列在 8.2 部分，表格 2。

入组和随访 28 天内发生的所有其他 AE 必须记录在患者医疗记录和纸质 CRF 中。必须记录有关事件发生日期，严重程度和试验治疗相关性的信息（定义上）。

SAE 报告的最低限度信息将包括：

- 患者姓名首字母缩写和研究编号
- 事件性质
- 事件开始和结束
- 主要或合作研究者对研究药物与事件之间关系的判定（可能、很可能或肯定相关）
- 事件是否需要治疗以及给予何种治疗。

### 8.4.2 严重不良事件报告

“严重不良事件”分类与不良事件严重程度的评估无关。基于上述标准，严重程度为轻度的事件可归类为严重不良事件。鉴于危重患者在 ICU 住院期间可能发生上述任何已收录的 SAE 标准，参与研



究中心的工作人员获知事件后 24 小时内，仅将认为与研究治疗相关的 SAE 报告给监查员 / PI。主治医生认为与研究治疗无关的严重不良事件将通过电子病例报告表报告给协调中心。如上所述，作为原发疾病过程的自然病史或预期的危重病并发症的一部分的 SAE 在本试验中不会被报告为严重不良事件。

注意：

SAE 上报要求：

上报 SAE 是研究者主要职责：研究者按照相关 SOP 在获知 24 小时内上报主要研究者、伦理委员会等，并定期向当地伦理委员会汇报。

首次报告：获知发生 SAE 的 24 小时内

随访报告：获知 SAE 产生重要节点的 24 小时内

总结报告：获知 SAE 结束的 24 小时内

报告文件：使用 NMPA 统一的 SAE 报告表

报告方式：可以使用微信、邮箱、电话等方式（非注册临床试验）

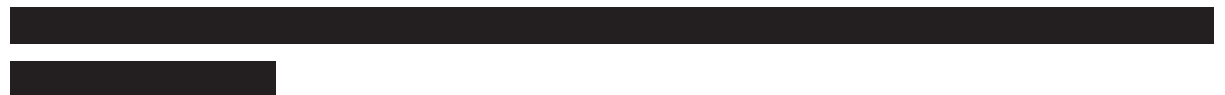

将每月汇总的全国 SAE 报告汇总给组长单位主要研究者，组长单位研究者再按照伦理委员会要求，按月或季度汇总递交伦理。

不良事件报告流程图

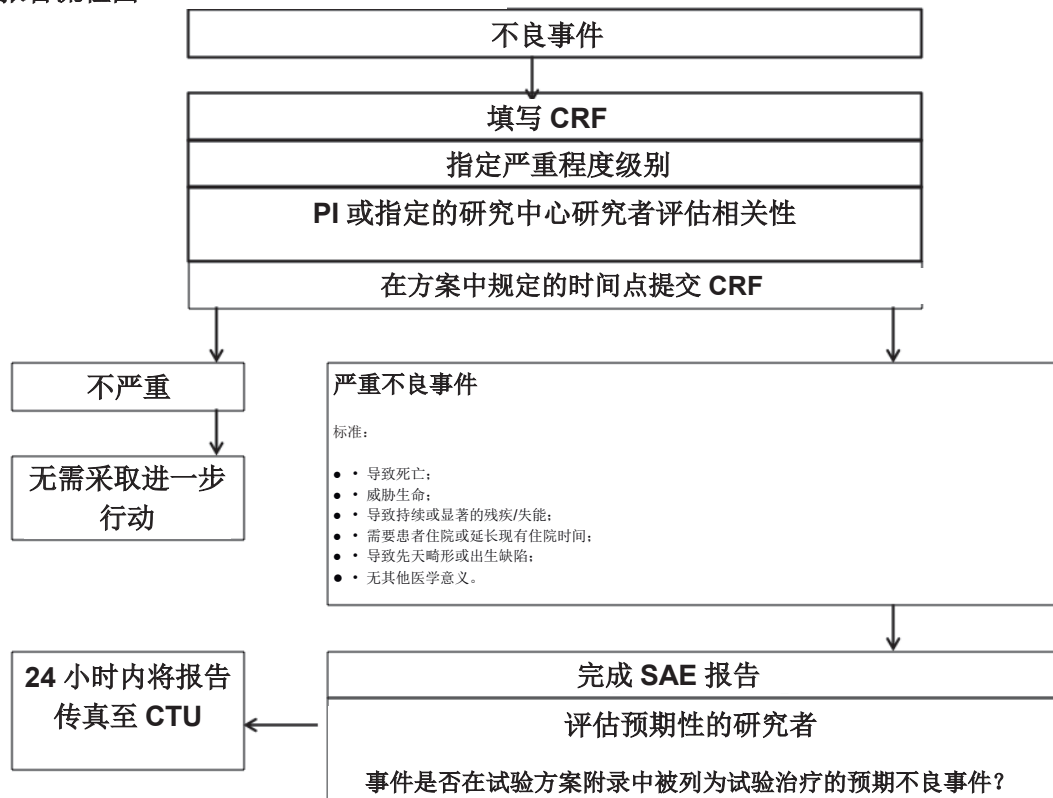

#### 8.4.3 疑似非预期严重不良反应 (SUSAR)

非预期 AE 是任何特异性或严重程度与研究手册或说明书不一致的不良事件。此外，增加关于已知经证实的 AE 特异性或严重程度重要信息的报告构成了非预期 AE。例如，比研究手册中所述更为特异或严重的事件被认为是“非预期”事件。根据适用法规，如果出现疑似、非预期、严重不良反应 (SUSAR)，SUSAR 与设盲治疗有关，则通常在向卫生机构、伦理委员会和研究者报告之前，揭盲患者的治疗编码。

协调中心的工作人员将负责跟踪所有 SUSAR，以确保所有细节都详细记录。协调中心还负责提醒参与中心 SUSAR 报告，并在规定的时间范围内向监管机构报告。每个主要研究者都有责任根据当地要求，向当地伦理委员会定期汇总所有发生的 SAE 和 SUSAR 事件。当地 IRB 的有关决议的副本也应发送到协调中心。

非预期严重不良反应个例安全性报告内容应按照 ICH 《E2B (R3)：临床安全数据的管理：个例安全性报告传输的数据要素》相关要求报告。相关术语应采用 ICH《M1：监管活动医学词典 (MedDRA)》进行编码。

研究者获知严重不良事件后，应立即对严重不良事件进行全面分析、评估和判断。根据严重不良事件的性质 (类别) 按以下时限向组长单位快速报告：

（一）对于致死或危及生命的非预期严重不良反应，研究者应在首次获知后尽快报告，但不得超过 7 天，并在随后的 8 天内报告、完善随访信息。

注：研究者首次获知当天为第 0 天。

（二）对于非致死或危及生命的非预期严重不良反应，研究者应在首次获知后尽快报告，但不得超过 15 天。

快速报告开始时间为该中心临床研究开始日期，结束时间为国内最后一例受试者随访结束日期。临床试验结束或随访结束后至获得审评审批结论前发生的严重不良事件，由研究者报告申请人，若属于非预期严重不良反应，也应进行快速报告。

研究者在首次报告后，应继续跟踪严重不良反应，以随访报告的形式及时报送有关新信息或对前次报告的更改信息等，报告时限为获得新信息起 15 天内。

## 8.5 研究终止规则

武汉市金银潭医院和其他参与单位或国家食品药品监督管理总局（CFDA）可以随时终止本研究。终止研究的原因可能包括但不限于下列：

- 本研究或其他研究中的 AE 的发生率或严重程度表明对患者有潜在的危害
- 患者入组不理想

## 8.6 安全性监测

本研究由项目组和 GCP 中心监督不良事件，并对 SAE 评估及处理。

## 9 统计学考量

### 9.1 概述

由于本研究是应对突发公共卫生事件紧急开展的临床试验，对于研究干预无充足的信息以指导验证性试验的设计。因此研究的统计学推断仅对临床决策具有参考性价值。

详细的统计分析计划将在研究数据锁定前制定。

### 9.2 样本量

由于本次研究是应对突发公共卫生事件，对该疾病的致病能力尚无清晰的认识，患者的临床转归和疾病改善均不明确。且该治疗方案用于 SARS 的数据是来源于历史对照研究，无法评估其有效性。因此，项目组决定初步将样本量设定为 160 例，标准治疗组为 80 例，干预组为 80 例。完成初步入组后，计算统计把握度，若提示干预有效且统计把握度不足以证实有效性，将评估考虑进一步扩大样本量。若统计把握度足以说明有效性或无效，将停止本阶段研究。

### 9.3 随机化

本研究采用电话/微信随机，为保障分配隐藏，负责随机的人员不得参与患者疾病治疗和预后评估等。

随机过程将使得治疗组和空白对照组的患者比例约为 1:1，按照氧疗支持水平（是否需要无创通气或更高程度支持）进行分层。具体随机过程为：在确认受试者提供知情同意后，并符合所有入选标准且不符合任意一条排除标准，对受试者进行随机，获得受试者的随机号及药物分配情况。

### 9.4 分析人群

ITT 分析集：所有完成随机化的受试者。

m-ITT1（全分析集 FAS）：在 ITT 原则的基础上，尽可能纳入所有随机化的受试者。仅剔除以下已随机的受试者：受试者未接受试验用药物的治疗；随机化后无任何观测数据。

m-ITT2：在 m-ITT1 基础上，剔除在随机化后 24 小时内死亡的受试者。

符合方案集 PPS：FAS 人群的基础上，剔除具有可能会影响疗效评价的方案违背的受试者。

安全性分析数据集 SS：包括至少接受 1 次研究药物治疗的所有患者。

ITT 人群将作为本研究的主要有效性分析人群。

## 9.5 统计分析方法

### 9.5.1 一般原则

定量指标的描述将计算其均数、标准差、中位数、最小值、最大值。分类指标描述各类的例数及百分数。定量指标的组间比较采用根据数据分布情况成组 t 检验或 Wilcoxon 秩和检验（若 t 检验不适用），分类指标采用卡方检验或精确概率法（若卡方检验不适用），等级资料采用 Wilcoxon 秩和检验或 CMH 检验，同时采用等级 logistic 回归计算等级 OR 值。所有的统计检验如不特殊说明均采用双侧检验，P 值小于 0.05（双侧）将被认为所检验的差别有统计意义。

### 9.5.2 主要终点分析策略

研究主要终点为时间-事件终点，采用生存分析方法比较两组患者达到临床改善的时间。将描述两组的中位改善时间、28 天累计改善率，两组比较方法采用 log-rank 检验，并通过 Cox 比例风险模型计算临床改善的风险比（Hazard Ratio, HR）及其 95% 置信区间。

### 9.5.3 缺失值的处理

对于患者状态评价的缺失，将采用患者最后一次评估的结果作为最终分析的结果。患者在临床改善前发生死亡将处理为最差结果，即 28 天后删失。

### 9.5.4 亚组分析

将按照随机化时考虑的分层因素：氧疗支持水平（是否需要经鼻高流量或更高程度支持）进行主要终点的亚组分析。

### 9.5.5 敏感性分析

本研究主要疗效终点分析人群为 ITT 人群，并采用 ITT 分析策略。其他分析人群及分析策略将作为敏感性分析。

本研究主要终点截至随机后 28 天，主要终点的分析将对所有超过 28 天的数据做删失处理。考虑到受试者 28 天后仍有疗效评价（包括未出院患者和出院患者的电话随访），将纳入 28 天后的数据作为敏感性分析结果。

## 10 源文件与源数据 / 文件的访问

这项研究的数据收集工具将使用经过验证的电子系统，数据录入到经过验证的数据库或数据系统。记录在纸质 CRF 以及来自其他研究来源的数据管理将按照标准进行。国际公认的和公认的词表将用于数据编码

## 11 质量保证和质量控制

本研究将严格按照各个研究中心的规章制度和 GCP 的指南进行。

### 11.1. 研究者材料

每个参研中心将保留 GCP 指南规定的基本的文件。

### 11.2. 研究材料

将提供一份纸质版完整详细的数据收集指南，包括定义和具体内容。为保障 CRF 和 EDC 系统的正确使用，还将提供随机和 EDC 系统的使用指南。所有这些文件也可以 PDF 格式电子版形式提供，以便根据需要进行打印。以上材料是为了保证研究协调员进行高质量的数据收集和数据输入。

### 11.3. 启动

在分中心研究启动前，将进行初始访视以确保所有相关的基本文件和试验用品都已到位，并且确保参与研究的人员完全了解研究方案和 SOP。所有研究人员都将接受培训，解释研究方案和流程，本次应急状态下将使用纸质版 CRF，并录入数据库。研究中心的“启动访视”将通过电话会议或视频会议进行。将为研究人员提供书面和电子材料。

#### 11.4. 研究期间的监察

研究者和医疗机构负责人（如适用）同意允许监察员直接访问所有相关文件。项目组和武汉市金银潭医院 GCP 中心人员将负责试验监察。将根据研究计划进行现场监察访视。监察人员在招募阶段将多次访问每个研究中心。

在研究期间的现场监察访视中，研究监察员将确认受试者知情同意，检查数据记录的完整性，数据质量，方案、SOP 和 GCP 遵守，以及患者招募，研究药物储存和后续随访的完成情况。

监察以确保：

- 充分获得受试者的知情同意
- 受试者的安全和权利受到保护。
- 研究是根据方案，GCP 指南和适用的法规要求进行的。
- 数据真实，准确，完整。
- 此外，在研究期间或之后的任何时间都有可能进行稽查。

此外，协调中心成员将通过经过验证的和一致的规则以及定期数据清理对基于网络的数据库定期进行本地或远程监控，以确保研究数据的完整性

#### 11.5. 研究中心关闭

在研究完成后，监察人员将确保制计划，规定各个研究中心长期储存相关数据和源文件（为期 5 年）。研究药物将根据当地标准程序进行核对并销毁。

## 12 伦理 / 人类受试者保护

### 12.1 伦理学标准

研究将严格按照在《赫尔辛基宣言》中有关的伦理原则进行。研究方案将由中国各中心的研究伦理委员会（Ethics Committee）审核并批准。

## 12.2 机构审查委员会

本项目的方案将由每家参加研究中心的 IEC/IRB 进行审查。在进行多中心试验的单一伦理审查的司法辖区内，1 名主要研究者（称为协调研究者）将负责代表该委员会中的研究者向 IEC/IRB 申请。每位主要研究者将负责在各个参与研究中心申请当地研究监管部门的批准。研究开始前，研究方案和知情同意文件的批准文件将在任何研究中心开始前提供给协调中心。协调中心将以编制标准申请表和模板知情同意书的形式协助这一流程。如必要，将调整标准信息声明和知情同意书的内容和格式，以符合当地 IEC/IRB 指南和要求。试验期间，主要研究者将通知 IEC/IRB 对研究方案或知情同意文件的任何修订或修改，仅在收到 IEC/IRB 批准后方可实施，除非为消除对患者的直接危害而需要变更，在这种情况下，应尽快通知 IEC/IRB。主要研究者还将负责根据指南向 IEC/IRB 提交进度报告、不良事件报告和任何其他必要文件。所有 IEC/IRB 和研究管理专员的通信副本将连同批准的知情同意书副本一起提供给协调中心。相同文件的副本也将保存在研究的研究者文件中。

## 12.3 知情同意程序

### 12.3.1 提供给受试者的知情 / 同意和其他须知文件

知情同意书是向人们提供信息，帮助决定是否作为受试者参加研究的过程。它是人类研究受试者和研究人员之间关于研究的基本信息的即时交谈，在获得知情同意前开始，一直持续至受试者参加研究。研究基本信息讨论将包括研究目的、持续时间、实验程序、替代方法、风险和获益，受试者有机会提出问题并得到解答。受试者在接受任何研究特定程序前应签署知情同意文件。受试者在整个试验过程中可随时撤回知情同意。将向受试者提供一份知情同意文件的复本供其保存。研究者将在受试者的病历中记录知情同意书的签署。向受试者强调如果其拒绝参加本研究，医疗护理的质量不会受到不良影响，从而保护受试者的权利和健康。

本研究将在 ICU 和普通病房进行。除出院后的患者状态随访和生活质量问卷的实施外，所有研究相关评估均属于重症冠状病毒患者标准护理的一部分。在入组本研究前，各研究中心的主要研究者或其指定代表，将从任何清醒且理解能力正常的患者中获得书面知情同意书。在临床试验招募前，通常无法直接从 ICU 获得患者的书面和知情同意，因为这些患者通常无意识、接受镇静、插管和重病



无法理解与临床试验参与相关的信息。在这些情况下，本研究中获得知情同意的的方法将基于直系亲属或授权的亲属。

### 12.3.2 知情同意程序和记录

患者和研究者或指定人员将在表格上签名并注明日期。签署的知情同意书将保留在研究者研究中心文件中，或者在医疗机构的患者记录 / 文件中（如果当地要求）。如果在进行研究特定程序的日期获得知情同意，则研究记录或患者的临床记录必须清楚地显示在这些程序前获得了知情同意。当获得可能与知情同意相关的重要新信息时，或方案修订需要变更书面知情同意书的内容，将对患者提供的知情同意书和任何其他书面信息进行修订。研究者将及时通知患者，并要求患者签署修订后的知情同意书确认参加研究。修订后的知情同意书必须在实施前获得 IEC/IRB 的批准。

## 12.4 受试者和数据保密

所有记录将在中国法律规定的范围内保密。研究监查员和其他授权代理人可检查研究者保管的所有文件和记录，包括但不限于病历。记录将保持锁定，所有计算机输入和网络程序仅使用编码编号完成。未经受试者书面许可，不得发布临床信息，IRB、CFDA 或申办者的指定人员进行监查的必要情况除外。

### 12.4.1 研究使用的存储人体样本、标本或数据

本方案下采集的样本和数据将用于确定洛匹那韦/利托那韦和干扰素- $\alpha$ 2b 联合疗效安全性、病毒学检查和干预治疗的抗病毒效应。储存、未链接或未经确认的样本的研究使用，可豁免需要进行前瞻性 IRB 审查和批准。豁免申请将以书面形式向中日友好医院提交，经授权决定是否豁免研究活动。

## 13 数据处理与记录保存

### 13.1 数据采集和管理责任

将由各研究中心接受过培训的工作人员采集所有数据。然后将数据填写在设计病例报告表 (CRF) 中，定期由项目组成员录入电子数据库中，并与经验证数据系统中的其他来源提供的数据合并。研究者负责确保录入采集数据的完整、准确与及时记录。然后由项目组对病历中的数据进行审核。按照适用的标准和数据清理程序进行临床数据管理，以确保数据的完整性（例如，在数据中删除错误和不一致）。将使用 MedDRA 21.0 版本和内部经验证的药物词典对不良事件和合并用药术语进行编

码。将参考该地区所有获批药物的适用医学词典。电子病例报告表（包括质询和稽查跟踪）将由中日友好医院保存，副本将发送给研究者保存为研究者副本。

### 13.2 研究记录保存

研究结束后，研究者或医疗机构负责人（如适用）必须在安全的地点保存所有研究中心的研究记录（当地法规要求的除外）。如需要，必须易于访问记录，并且必须与机构、支持系统和相关研究中心工作人员的评估联合使用。在当地法律 / 法规或机构政策允许的情况下，某些或所有的记录可能以硬拷贝（例如，缩微胶片、扫描文件、电子）的格式保存；但是，在采取此类措施之前务必谨慎。研究者必须确保所有复制文件均清晰可辨，并且是原件的真实准确副本。此外，如需要，必须满足可访问和检索标准，包括硬拷贝副本的重建。研究者还必须确保复制文件有可用的备份，并有可接受的质量控制程序，用于创建复制文件。中日友好医院/武汉市金银潭医院应通知研究者保存临床试验机构记录的时间期限，以符合所有适用的监管要求。根据当地法律 / 法规和 / 或机构要求，最短保留时间将符合适用于特定研究中心的最严格标准。研究者必须将档案安排中的任何变更通知武汉市金银潭医院，包括但不限于研究中心外设施的记录存档或研究者不再与研究中心相关的事件的所有权转让。

### 13.3 方案偏离

将按照偏离类型总结方案偏离的数量（不合格患者随机化、不依从研究治疗和其他）。将列出所有方案偏离以及偏离描述和采取的纠正措施。

### 13.4 发表和数据共享政策

本研究将以 CAP-China 研究者的名义开展。中心项目协调和数据管理将由北京中日友好医院和北京大学提供。本研究的主要出版物将采用 CAP-China 研究者的姓名，并向所有协调研究者、研究协调员和机构分配完整的信用凭证。如果发表时需要个体姓名，则署名监督委员会和执行委员会成员的姓名，主要研究者的姓名排在末位（通讯、共同通讯作者），随后按照各个中心入组病例数排序和研究实际贡献，设置若干名共同一作。

## 14 利益冲突政策

研究受试者可以审查方案，评估利益冲突。

## 15 参考文献

- 1 Ksiazek TG, Erdman D, Goldsmith CS, *et al.* A Novel Coronavirus Associated with Severe Acute Respiratory Syndrome. *N Engl J Med* 2003; **348**: 1953–66.
- 2 Drosten C, Günther S, Preiser W, *et al.* Identification of a Novel Coronavirus in Patients with Severe Acute Respiratory Syndrome. *N Engl J Med* 2003; **348**: 1967–76.
- 3 Fehr AR, Channappanavar R, Perlman S. Middle East Respiratory Syndrome: Emergence of a Pathogenic Human Coronavirus. *Annu Rev Med* 2017; **68**: 387–99.
- 4 Falzarano D, de Wit E, Rasmussen AL, *et al.* Treatment with interferon- $\alpha$ 2b and ribavirin improves outcome in MERS-CoV-infected rhesus macaques. *Nat Med* 2013; **19**: 1313–7.
- 5 Kim UJ, Won E-J, Kee S-J, Jung S-I, Jang H-C. Combination therapy with lopinavir/ritonavir, ribavirin and interferon-alpha for Middle East respiratory syndrome: a case report. *Antivir Ther* 2015; **21**: 455–9.
- 6 Chan JFW, Chan K-H, Kao RYT, *et al.* Broad-spectrum antivirals for the emerging Middle East respiratory syndrome coronavirus. *J Infect* 2013; **67**: 606–16.
- 7 Shalhoub S, Farahat F, Al-Jiffri A, *et al.* IFN- $\alpha$ 2a or IFN- $\beta$ 1a in combination with ribavirin to treat Middle East respiratory syndrome coronavirus pneumonia: a retrospective study. *J Antimicrob Chemother* 2015; **70**: 2129–32.
- 8 Al-Tawfiq JA, Momattin H, Dib J, Memish ZA. Ribavirin and interferon therapy in patients infected with the Middle East respiratory syndrome coronavirus: an observational study. *Int J Infect Dis IJID Off Publ Int Soc Infect Dis* 2014; **20**: 42–6.
- 9 Huang X, Xu Y, Yang Q, *et al.* Efficacy and biological safety of lopinavir/ritonavir based anti-retroviral therapy in HIV-1-infected patients: a meta-analysis of randomized controlled trials. *Sci Rep* 2015; **5**: 8528.
- 10 Chu CM. Role of lopinavir/ritonavir in the treatment of SARS: initial virological and clinical findings. *Thorax* 2004; **59**: 252–6.
- 11 Spanakis N, Tsiodras S, Haagmans BL, *et al.* Virological and serological analysis of a recent Middle East respiratory syndrome coronavirus infection case on a triple combination antiviral regimen. *Int J Antimicrob Agents* 2014; **44**: 528–32.
- 12 Min C-K, Cheon S, Ha N-Y, *et al.* Comparative and kinetic analysis of viral shedding and immunological responses in MERS patients representing a broad spectrum of disease severity. *Sci Rep* 2016; **6**: 25359.

13 WHO | Clinical management of severe acute respiratory infection when Middle East respiratory syndrome coronavirus (MERS-CoV) infection is suspected. WHO. [http://www.who.int/csr/disease/coronavirus\\_infections/case-management-ipc/en/](http://www.who.int/csr/disease/coronavirus_infections/case-management-ipc/en/) (accessed Jan 9, 2020).

14. Philip R. Wyde, Samuel Z. Wilson, Michael J. Kramer, et al. Pulmonary Deposition and Clearance of Aerosolized Interferon[J]. *Antimicrobial Agents and Chemotherapy*, 1984,25(6):729-734.

## 附录：雾化吸入标准化操作规程

### 一、目的

雾化方式、雾化装置，操作流程标准化，以保证各中心试验药物雾化吸入治疗操作的一致性。

### 二、雾化方式

所有中心均采用空气压缩方式（雾化泵）进行雾化，不使用超声雾化及氧驱雾化。

### 三、雾化装置（具体情况需视研究中心实际使用设备情况而定）

**雾化器：**限于以下德国百瑞下呼吸道系列雾化器

PARI Turbo BOY N（085G1205）（主流，首选）

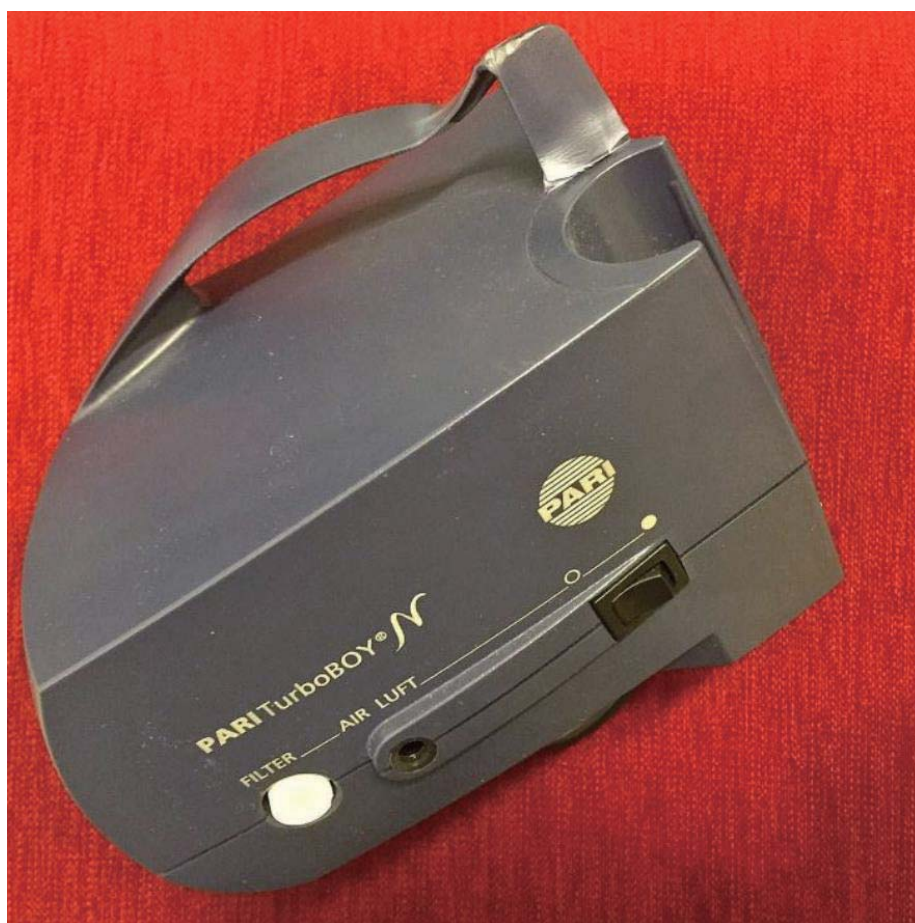

PARI BOY XS（085G3005）（备选）

PARI Junior BOY SX（085G3305）（儿童用，备选）



INQUA NEB Plus (BR060400) (家用型, 压力低, 雾化时间久, 医院较少见)

**喷雾器:** 限于以下三种百瑞喷雾器

PARI LC PLUS 喷雾器 (1205 标配, 常见喷雾器, 建议作为首选喷雾器)

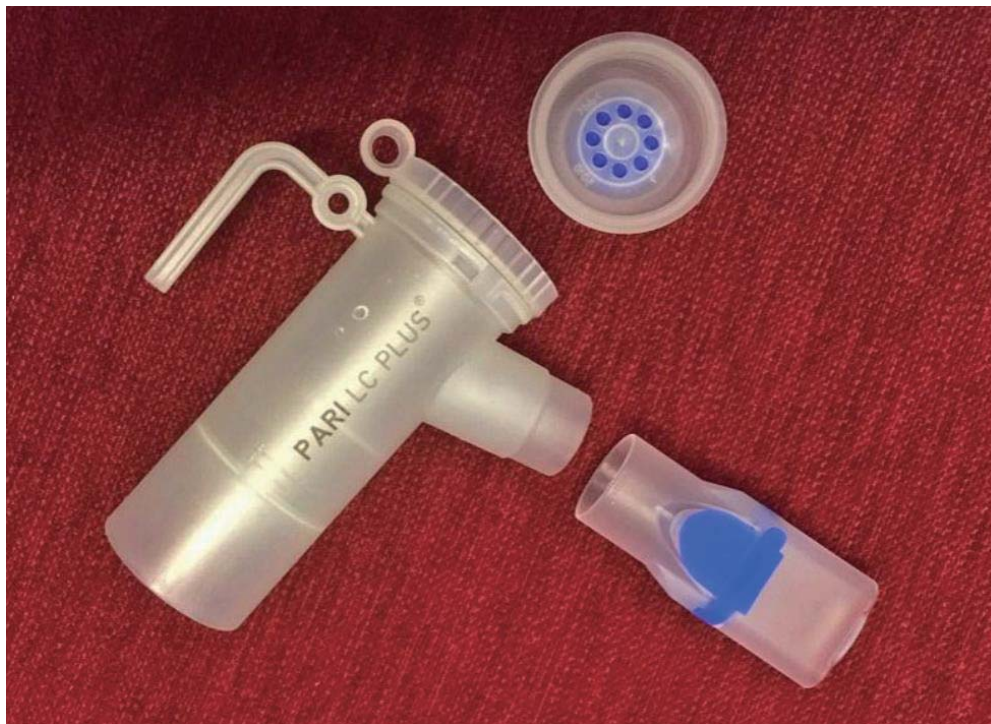

PARI LC Sprint 喷雾器 (备选)

PARI LL 喷雾器 (备选)

#### **机械通气患者雾化:**

机械通气患者原则上使用 T 形管接呼吸机管理进行雾化吸入, 但由于部分患者病情极其危重。该部分患者的雾化药物是否给予, 需经治医生判断医疗安全情况下决定是否给予。

#### **四、药品使用**

取 1 支 (1ml/支, 共 1ml, 500IU) 治疗用药或模拟药, 加 2ml 生理盐水稀释。

#### **五、雾化操作**

- 1.体位: 坐位或半卧位, 建议餐后一小时后雾化。
- 2.治疗前先将痰液咳出, 以免妨碍雾滴吸入。
- 3.加入药液后, 请保持装置处于竖直, 以免药液流出。
- 4.患者需进行慢而深的吸气, 吸气末稍稍停片刻, 使雾滴吸入更深。
- 5.每次吸入时间 10-20 分钟 (不应超过 20 分钟)。
- 6.吸入期间如果出现咳嗽、气促等症状, 应立即停止雾化吸入, 并及时通知护士。
- 7.同一患者每次雾化完毕, 雾化器及喷雾器须用清水清洁晾干, 以备下次使用。不同患者之间使用

同一个喷雾器，须对雾化器消毒。

8.雾化结束末期，间断出雾时，应摇晃药杯，令药液尽量雾化完毕，残余量不应大于 1ml。

9.患者首次使用，应在医师面前操作，以观察是否正确。

10.雾化结束后应漱口，避免药物在口腔残留。

一项评价洛匹那韦/利托那韦联合标准治疗在 2019 新型冠状病毒  
感染住院患者中的疗效和安全性随机、开放、对照的研究

A randomized, controlled open-label trial to evaluate the efficacy and  
safety of lopinavir-ritonavir in combination with standard-of-care in  
hospitalized patients with 2019-nCoV infection

研究方案识别码/方案编号：<CAP-China coronavirus treatment >

版本编号：v.2.0

2020 年 01 月 28 日



## 目录

|                                                                                                                                                                                                                                              |           |
|----------------------------------------------------------------------------------------------------------------------------------------------------------------------------------------------------------------------------------------------|-----------|
| 缩略语列表 .....                                                                                                                                                                                                                                  | 6         |
| 合规性声明 .....                                                                                                                                                                                                                                  | 9         |
| 方案摘要 .....                                                                                                                                                                                                                                   | 10        |
| 研究设计示意图 .....                                                                                                                                                                                                                                | 14        |
| <b>1 研究管理 .....</b>                                                                                                                                                                                                                          | <b>15</b> |
| <b>2 引言：背景信息与科学依据 .....</b>                                                                                                                                                                                                                  | <b>16</b> |
| 2.1 背景信息 .....                                                                                                                                                                                                                               | 16        |
| 2.2 潜在风险和获益 .....                                                                                                                                                                                                                            | 17        |
| 2.2.1 已知的潜在风险 .....                                                                                                                                                                                                                          | 17        |
| <b>克力芝 17</b>                                                                                                                                                                                                                                |           |
| 临床试验期间与本品治疗相关的最常见的不良反应为腹泻、恶心、呕吐、高甘油三酯血症和高胆固醇血症。每日一次服用本品的患者发生腹泻的风险可能较大。腹泻、恶心和呕吐在治疗开始的时候就可能出现，高甘油三酯血症和高胆固醇血症可能会稍后出现。在 II-IV 期试验中，有 7% 的受试者因在治疗中出现不良事件而导致提前退出研究。 .....                                                                          | 17        |
| 值得注意的是，接受本品治疗的患者中已有发生胰腺炎的报告，包括那些出现了高甘油三酯血症的患者，绝大多数报告病例中，患者系既往有胰腺炎罹患病史和/或与其它可引发胰腺炎的药物进行合并治疗，甘油三酯显著升高是发生胰腺炎的一个危险因素。此外，在本品治疗过程中出现 PR 间期延长的报告极为罕见，如患者存在结构性心脏疾病和原有传导系统异常或者接受可引起 PR 间期延长的药物(如维拉帕米或阿扎那韦)，则在接受洛匹那韦利托那韦后有罕见报道发生 2 度或 3 度房室传导阻滞。 ..... | 17        |
| <b>成人患者在临床研究和上市后使用中发生的不良反应：</b> 频率分级中包括了所有已报告的中度至重度事件，无论是否存在因果关系。根据身体系统器官分类列出                                                                                                                                                                |           |

|          |                                                                                                                                                              |    |
|----------|--------------------------------------------------------------------------------------------------------------------------------------------------------------|----|
|          | 了不良反应，在每个频率分组中，不良反应发生频率按降序排列：极常见 $\geq 1/10$ ；<br>常见 $\geq 1/100, < 1/10$ ；不常见 $\geq 1/1000, < 1/100$ 。列表如下，                                                 | 17 |
|          | 表 1.成人患者在临床研究中和上市后使用中发生的不良反应                                                                                                                                 | 17 |
|          | 备注：给出频率为“不明”的事件在上市后监测中被确认。                                                                                                                                   | 19 |
|          | <b>重组人干扰素 <math>\alpha 2b</math> 注射液（安福隆）</b>                                                                                                                | 19 |
|          | <b>本品注射液载入说明书（皮下给药）的不良反应为如下：</b>                                                                                                                             | 20 |
|          | 重组人干扰素 $\alpha 2b$ 注射液常见的不良反应有感冒样症状，如发烧、头痛、寒战、<br>乏力、肌肉酸痛、关节痛等，部分病人可出现厌食、恶心、腹泻、呕吐、白细胞<br>减少、血小板减少、转氨酶增高，停药后即可恢复正常。偶见有失眠、皮疹、脱<br>发、血压升高或降低、耳鸣、视力下降、神经系统功能紊乱等。 | 20 |
|          | 2.3.2 已知的潜在获益                                                                                                                                                | 20 |
| <b>3</b> | <b>目的与目标</b>                                                                                                                                                 | 20 |
| <b>4</b> | <b>研究设计和观察终点</b>                                                                                                                                             | 20 |
|          | 4.1 研究设计描述                                                                                                                                                   | 20 |
|          | 4.2 研究终点                                                                                                                                                     | 22 |
|          | 4.2.1 主要终点                                                                                                                                                   | 22 |
|          | 4.2.2 次要终点                                                                                                                                                   | 23 |
| <b>5</b> | <b>研究入组与退出</b>                                                                                                                                               | 23 |
|          | 5.1 受试者入选标准                                                                                                                                                  | 23 |
|          | 5.2 受试者排除标准                                                                                                                                                  | 24 |
|          | 5.3 招募和保留策略                                                                                                                                                  | 24 |
|          | 5.4 受试者退出或终止试验                                                                                                                                               | 24 |
|          | 5.4.1 退出或终止的原因                                                                                                                                               | 24 |
|          | 5.4.2 受试者撤回或终止研究的处理                                                                                                                                          | 25 |
| <b>6</b> | <b>研究药物</b>                                                                                                                                                  | 26 |
|          | 6.1 研究药物                                                                                                                                                     | 26 |

|          |                      |           |
|----------|----------------------|-----------|
| 6.1.1    | 药品.....              | 26        |
| 6.1.2    | 产品储存和稳定性.....        | 26        |
| 6.1.3    | 药物制备.....            | 26        |
| 6.1.4    | 用量用法.....            | 27        |
| 6.1.5    | 治疗持续时间.....          | 27        |
| 6.1.6    | 剂量跟踪.....            | 27        |
| 6.2      | 研究药物清点程序.....        | 27        |
| <b>7</b> | <b>研究程序和时间表.....</b> | <b>27</b> |
| 7.1      | 研究程序 / 评价.....       | 27        |
| 7.1.1    | 研究特殊流程.....          | 27        |
| 7.1.2    | 标准治疗研究程序.....        | 28        |
| 7.2      | 实验室程序 / 评价.....      | 28        |
| 7.2.1    | 临床实验室评价.....         | 28        |
| 7.2.2    | 其他检测或程序.....         | 28        |
| 7.2.3    | 样本制备、处理和储存.....      | 28        |
| 7.2.4    | 样本运输.....            | 29        |
| 7.2.5    | 样本的预期用途.....         | 29        |
| 7.3      | 研究时间表.....           | 29        |
| 7.3.1    | 筛选.....              | 29        |
| 7.3.2    | 入组 / 基线.....         | 30        |
| 7.3.3    | 随访.....              | 31        |
| 7.3.4    | 最终研究访视.....          | 31        |
| 7.3.5    | 提前退出访视.....          | 32        |
| 7.3.6    | 事件时间表.....           | 33        |
| 7.4      | 合并药物、治疗和程序.....      | 37        |

|          |                          |          |
|----------|--------------------------|----------|
| 7.4.1    | 需要注意的药物、治疗和程序.....       | 37       |
| 7.5      | 慎用药物、治疗和程序.....          | 1        |
| 7.6      | 急救药物、治疗和程序.....          | 1        |
| 7.7      | 研究关闭后受试者的研究药物获取 .....    | 1        |
| <b>8</b> | <b>安全性评估 .....</b>       | <b>1</b> |
| 8.1      | 安全性参数质量标准 .....          | 1        |
| 8.1.1    | 不良事件（AE）的定义 .....        | 2        |
| 8.1.2    | 严重不良事件（SAE）的定义.....      | 2        |
| 8.1.3    | 非预期问题（UP）的定义.....        | 2        |
| 8.2      | 不良事件分类 .....             | 2        |
| 8.2.1    | 事件严重程度 .....             | 2        |
| 8.2.2    | 与研究药物的关系.....            | 3        |
| 8.2.3    | 可预期的严重不良事件.....          | 3        |
| 8.3      | 事件评估和随访的时间期限和频率 .....    | 4        |
| 8.4      | 报告程序.....                | 5        |
| 8.4.1    | 不良事件报告 .....             | 5        |
| 8.4.2    | 严重不良事件报告 .....           | 5        |
| 8.4.3    | 疑似非预期严重不良反应（SUSAR） ..... | 7        |
| 8.5      | 研究终止规则 .....             | 8        |
| 8.6      | 安全性监查 .....              | 8        |
| <b>9</b> | <b>统计学考量 .....</b>       | <b>9</b> |
| 9.1      | 概述.....                  | 9        |
| 9.2      | 样本量 .....                | 9        |
| 9.3      | 随机化 .....                | 9        |
| 9.4      | 分析人群.....                | 9        |

|           |                              |           |
|-----------|------------------------------|-----------|
| 9.5       | 统计分析方法 .....                 | 10        |
| 9.5.1     | 一般原则 .....                   | 10        |
| 9.5.2     | 主要终点分析策略 .....               | 10        |
| 9.5.3     | 缺失值的处理 .....                 | 10        |
| 9.5.4     | 亚组分析 .....                   | 10        |
| 9.5.5     | 敏感性分析 .....                  | 11        |
| <b>10</b> | <b>源文件与源数据 / 文件的访问 .....</b> | <b>11</b> |
| <b>11</b> | <b>质量保证和质量控制 .....</b>       | <b>11</b> |
| 11.1.     | 研究者材料 .....                  | 11        |
| 11.2.     | 研究材料 .....                   | 11        |
| 11.3.     | 启动 .....                     | 11        |
| 11.4.     | 研究期间的监察 .....                | 12        |
| 11.5.     | 研究中心关闭 .....                 | 12        |
| <b>12</b> | <b>伦理 / 人类受试者保护 .....</b>    | <b>12</b> |
| 12.1      | 伦理学标准 .....                  | 12        |
| 12.2      | 机构审查委员会 .....                | 13        |
| 12.3      | 知情同意程序 .....                 | 13        |
| 12.3.1    | 提供给受试者的知情 / 同意和其他须知文件 .....  | 13        |
| 12.3.2    | 知情同意程序和记录 .....              | 14        |
| 12.4      | 受试者和数据保密 .....               | 14        |
| 12.4.1    | 研究使用的存储人体样本、标本或数据 .....      | 14        |
| <b>13</b> | <b>数据处理与记录保存 .....</b>       | <b>14</b> |
| 13.1      | 数据采集和管理责任 .....              | 14        |
| 13.2      | 研究记录保存 .....                 | 15        |
| 13.3      | 方案偏离 .....                   | 15        |

|       |                     |    |
|-------|---------------------|----|
| 13.4  | 发表和数据共享政策 .....     | 15 |
| 14    | 利益冲突政策 .....        | 15 |
| 15    | 参考文献 .....          | 15 |
| 附录:   | 雾化吸入标准化操作规程 .....   | 18 |
|       | 缩略语列表 .....         | 32 |
|       | 合规性声明 .....         | 35 |
|       | 方案摘要 .....          | 36 |
|       | 研究设计示意图 .....       | 39 |
| 2     | 研究管理 .....          | 39 |
| 2     | 引言: 背景信息与科学依据 ..... | 41 |
| 2.1   | 背景信息 .....          | 41 |
| 2.2   | 潜在风险和获益 .....       | 42 |
| 2.2.1 | 已知的潜在风险 .....       | 42 |
| 2.3.2 | 已知的潜在获益 .....       | 44 |
| 3     | 目的与目标 .....         | 44 |
| 4     | 研究设计和观察终点 .....     | 45 |
| 4.1   | 研究设计描述 .....        | 45 |
| 4.2   | 研究终点 .....          | 46 |
| 4.2.1 | 主要终点 .....          | 46 |
| 4.2.2 | 次要终点 .....          | 46 |
| 5     | 研究入组与退出 .....       | 47 |
| 5.1   | 受试者入选标准 .....       | 47 |
| 5.2   | 受试者排除标准 .....       | 47 |
| 5.3   | 招募和保留策略 .....       | 48 |
| 5.4   | 受试者退出或终止试验 .....    | 48 |

|          |                      |           |
|----------|----------------------|-----------|
| 5.4.1    | 退出或终止的原因.....        | 48        |
| 5.4.2    | 受试者撤回或终止研究的处理.....   | 49        |
| <b>6</b> | <b>研究药物.....</b>     | <b>49</b> |
| 6.1      | 研究药物.....            | 49        |
| 6.1.1    | 药品.....              | 49        |
| 6.1.2    | 产品储存和稳定性.....        | 50        |
| 6.1.3    | 药物制备.....            | 50        |
| 6.1.4    | 用量用法.....            | 50        |
| 6.1.5    | 治疗持续时间.....          | 50        |
| 6.1.6    | 剂量跟踪.....            | 50        |
| 6.2      | 研究药物清点程序.....        | 50        |
| <b>7</b> | <b>研究程序和时间表.....</b> | <b>51</b> |
| 7.1      | 研究程序 / 评价.....       | 51        |
| 7.1.1    | 研究特殊流程.....          | 51        |
| 7.1.2    | 标准治疗研究程序.....        | 51        |
| 7.2      | 实验室程序 / 评价.....      | 51        |
| 7.2.1    | 临床实验室评价.....         | 51        |
| 7.2.2    | 其他检测或程序.....         | 51        |
| 7.2.4    | 样本制备、处理和储存.....      | 52        |
| 7.2.4    | 样本运输.....            | 52        |
| 7.2.5    | 样本的预期用途.....         | 52        |
| 7.3      | 研究时间表.....           | 52        |
| 7.3.1    | 筛选.....              | 52        |
| 7.3.2    | 入组 / 基线.....         | 53        |
| 7.3.3    | 随访.....              | 54        |

|          |                          |           |
|----------|--------------------------|-----------|
| 7.3.4    | 最终研究访视 .....             | 55        |
| 7.3.5    | 提前退出访视 .....             | 55        |
| 7.3.6    | 事件时间表 .....              | 56        |
| 7.4      | 合并药物、治疗和程序 .....         | 60        |
| 7.4.1    | 需要注意的药物、治疗和程序 .....      | 60        |
| 7.5      | 慎用药物、治疗和程序 .....         | 63        |
| 7.6      | 急救药物、治疗和程序 .....         | 63        |
| 7.7      | 研究关闭后受试者的研究药物获取 .....    | 63        |
| <b>8</b> | <b>安全性评估 .....</b>       | <b>63</b> |
| 8.1      | 安全性参数质量标准 .....          | 63        |
| 8.1.1    | 不良事件（AE）的定义 .....        | 64        |
| 8.1.2    | 严重不良事件（SAE）的定义 .....     | 64        |
| 8.1.3    | 非预期问题（UP）的定义 .....       | 64        |
| 8.2      | 不良事件分类 .....             | 64        |
| 8.2.1    | 事件严重程度 .....             | 64        |
| 8.2.2    | 与研究药物的关系 .....           | 65        |
| 8.2.3    | 可预期的严重不良事件 .....         | 65        |
| 8.3      | 事件评估和随访的时间期限和频率 .....    | 66        |
| 8.4      | 报告程序 .....               | 67        |
| 8.4.1    | 不良事件报告 .....             | 67        |
| 8.4.2    | 严重不良事件报告 .....           | 67        |
| 8.4.3    | 疑似非预期严重不良反应（SUSAR） ..... | 69        |
| 8.5      | 研究终止规则 .....             | 70        |
| 8.6      | 安全性监查 .....              | 70        |
| <b>9</b> | <b>统计学考量 .....</b>       | <b>71</b> |



|           |                             |           |
|-----------|-----------------------------|-----------|
| 9.1       | 概述.....                     | 71        |
| 9.2       | 样本量.....                    | 71        |
| 9.3       | 随机化.....                    | 71        |
| 9.4       | 分析人群.....                   | 71        |
| 9.5       | 统计分析方法.....                 | 72        |
| 9.5.1     | 一般原则.....                   | 72        |
| 9.5.2     | 主要终点分析策略.....               | 72        |
| 9.5.3     | 缺失值的处理.....                 | 72        |
| 9.5.4     | 亚组分析.....                   | 72        |
| 9.5.5     | 敏感性分析.....                  | 72        |
| <b>10</b> | <b>源文件与源数据 / 文件的访问.....</b> | <b>73</b> |
| <b>11</b> | <b>质量保证和质量控制.....</b>       | <b>73</b> |
| 11.1.     | 研究者材料.....                  | 73        |
| 11.2.     | 研究材料.....                   | 73        |
| 11.3.     | 启动.....                     | 73        |
| 11.4.     | 研究期间的监察.....                | 74        |
| 11.5.     | 研究中心关闭.....                 | 74        |
| <b>12</b> | <b>伦理 / 人类受试者保护.....</b>    | <b>74</b> |
| 12.1      | 伦理学标准.....                  | 74        |
| 12.2      | 机构审查委员会.....                | 74        |
| 12.3      | 知情同意程序.....                 | 75        |
| 12.3.1    | 提供给受试者的知情 / 同意和其他须知文件.....  | 75        |
| 12.3.2    | 知情同意程序和记录.....              | 75        |
| 12.4      | 受试者和数据保密.....               | 76        |
| 12.4.1    | 研究使用的存储人体样本、标本或数据.....      | 76        |

|           |                        |           |
|-----------|------------------------|-----------|
| <b>13</b> | <b>数据处理与记录保存</b> ..... | <b>76</b> |
| 13.1      | 数据采集和管理责任 .....        | 76        |
| 13.2      | 研究记录保存 .....           | 76        |
| 13.3      | 方案偏离.....              | 77        |
| 13.4      | 发表和数据共享政策 .....        | 77        |
| <b>14</b> | <b>利益冲突政策</b> .....    | <b>77</b> |
| <b>15</b> | <b>参考文献</b> .....      | <b>77</b> |

## 缩略语列表

| 英文缩写 | 中文名称         |
|------|--------------|
| ADR  | 药物不良反应       |
| AE   | 不良事件         |
| APPT | 活化部分凝血活酶时间   |
| ALP  | 碱性磷酸酶        |
| AST  | 天冬氨酸氨基转移酶    |
| ARDS | 急性呼吸窘迫综合征    |
| BAL  | 支气管肺泡灌洗      |
| BID  | 每日两次         |
| BUN  | 血尿素氮         |
| CBC  | 全血细胞计数       |
| CDC  | 疾病控制和预防中心    |
| NMPA | 国家食品药品监督管理总局 |
| CRF  | 病例报告表        |

|      |                  |
|------|------------------|
| CRRT | 连续肾脏替代治疗         |
| ECG  | 心电图              |
| ECMO | 体外膜肺氧合           |
| GCP  | 药物临床试验质量管理规范     |
| GFR  | 肾小球滤过率           |
| IB   | 研究者手册            |
| ICH  | 人用药品注册技术要求国际协调会议 |
| ICU  | 重症监护室            |
| IEC  | 独立伦理委员会          |
| IL   | 白介素              |
| IP   | 试验用药物            |
| IRB  | 机构审查委员会          |
| LDH  | 乳酸脱氢酶            |
| RNA  | 核糖核酸             |
| PCR  | 聚合酶链反应           |
| PT   | 凝血酶原时间           |
| PCR  | 聚合酶链反应           |

|     |        |
|-----|--------|
| SAE | 严重不良事件 |
| SAP | 统计分析计划 |
| U+E | 尿素+电解质 |
| ULN | 正常值上限  |

### 机密

本文件提供的信息严格保密，仅用于指导本研究。未经项目组预先批准，不得向与研究无关的其他方复制或披露本文件的部分或全部内容，也不得将其用于任何其他目的。

### 合规性声明

将按照 ICH E6、GCP 指南和主管部门相关管理规定开展本试验。将按照本方案的所有规定、伦理委员会批准条件开展本研究。

签名 (PI) : \_\_\_\_\_

## 方案摘要

|           |                                                                                                                                                                                                                                                                                                                                                                                                                                                                                                                                                                                                                                                                                                                                                                    |
|-----------|--------------------------------------------------------------------------------------------------------------------------------------------------------------------------------------------------------------------------------------------------------------------------------------------------------------------------------------------------------------------------------------------------------------------------------------------------------------------------------------------------------------------------------------------------------------------------------------------------------------------------------------------------------------------------------------------------------------------------------------------------------------------|
| <b>标题</b> | 一项评价洛匹那韦/利托那韦治疗武汉新型冠状病毒感染住院患者的疗效和安全性的随机、开放、空白对照的研究                                                                                                                                                                                                                                                                                                                                                                                                                                                                                                                                                                                                                                                                                                                 |
| <b>背景</b> | <p>新型冠状病毒感染是导致国内外突发公共卫生事件的重要原因，严重影响人民健康和社会稳定。2003 年我国暴发 SRAR-COV 造成了严重的社会影响。从 2002 年 1 月至 2003 年 8 月 7 日，全球累计病例共 8422 例，涉及 32 个国家和地区，其中死亡病例 919 例，病死率近 11%，老年患者和合并症患者的病死率更高。2012 年首次报告中东呼吸综合征冠状病毒 (MERS-COV) 感染以来，世界卫生组织已收到来自 27 个国家的 2468 例实验室确诊的 MERS-COV 感染病例通知，至少有 851 例报告死亡（病死率 34.5%）。</p> <p>目前尚无针对冠状病毒感染的确切有效治疗方法。基于体外数据，洛匹那韦利托那韦被认为是冠状病毒的候选治疗。洛匹那韦和利托那韦是抗逆转录病毒蛋白酶抑制剂，联合用于治疗人类免疫缺陷病毒 (HIV) 感染，且安全性较好。洛匹那韦/利托那韦联合曾用于 SARS 感染的治疗。在该项研究中，与 111 例接受利巴韦林治疗的 SARS 患者相比，41 例患者使用洛匹那韦/利托那韦联合治疗，结果发现症状发作后 21 天的不良临床结局（急性呼吸窘迫综合征或死亡）明显少于利巴韦林单药治疗（2.4%VS. 28.8%，P = 0.001）。然而，历史对照对照的研究数据无法可靠估计有效性。基于发现以及洛匹那韦/利托那韦和 IFN-β1B 的可用和安全性数据，2015 年日内瓦世界卫生组织召开 MERS 防治大会，认为洛匹那韦/利托那韦联合干扰素治疗具有潜在疗效。</p> <p>自 2019 年 12 月以来湖北省武汉市多家医院发现不明原因肺炎多例，部分病例核酸和二代测序结果提示为新型冠状病毒感染。鉴</p> |

|       |                                                                                                                                                                                                                             |
|-------|-----------------------------------------------------------------------------------------------------------------------------------------------------------------------------------------------------------------------------|
|       | <p>于应对此次疫情，无有效抗病毒治疗方案的情况下，国家和当地医疗救治组紧急启动该项研究，旨在评估多种可能有效的治疗措施（包括但不限于洛匹那韦/利托那韦，remdesivir，针对冠状病毒的单/多克隆抗体），探索最优的抗病毒治疗方案。</p> <p>第一阶段：将评估洛匹那韦/利托那韦治疗武汉新型冠状病毒感染住院患者的疗效和安全性。</p>                                                  |
| 目的    | 评价洛匹那韦/利托那韦治疗新型冠状病毒感染的成人住院患者的疗效和安全性。                                                                                                                                                                                        |
| 设计    | 随机、开放标签、平行对照临床试验。根据患者入组 24 小时内需要的氧疗支持水平进行分层随机化（分层标准：是否需要经鼻高流量及更高强度呼吸支持治疗）。                                                                                                                                                  |
| 终点    | 主要终点：入组 28 天临床改善时间（TIME TO CLINICAL IMPROVEMENT）：随机化后至临床改善的天数。临床改善定义为患者入院状态的 7 分等级量表评分降低 2 分或者出院。7 分等级量表包括：7 分：死亡；6 分：住院接受 ECMO 和 / 或机械通气；5 分：住院接受无创通气和 / 或高流量氧疗；4 分：住院接受氧疗；3 分：住院不需要接受氧疗；2 分：出院但未恢复正常功能状态；1 分：出院已恢复正常功能状态。 |
| 干预    | 洛匹那韦 400mg/利托那韦 100mg bid（2 片口服 bid）。                                                                                                                                                                                       |
| 人群    | 所有新型冠状病毒感染的成人住院患者                                                                                                                                                                                                           |
| 合格性标准 | <p>入选标准：</p> <p>5. 成人（定义为<math>\geq 18</math> 岁）</p> <p>6. 在尚未开发出快速诊断试剂盒情况下，经过临床诊断的不明原因病毒性肺炎患者；或经过 PCR 确证的新型冠状病毒</p>                                                                                                        |



|                      |                                                                                                                                                                                                                                                                                                                                                                                                                        |
|----------------------|------------------------------------------------------------------------------------------------------------------------------------------------------------------------------------------------------------------------------------------------------------------------------------------------------------------------------------------------------------------------------------------------------------------------|
|                      | <p>毒感染患者。</p> <p>7. 静息未吸氧状态下，患者 <math>SPO_2 \leq 94\%</math>，或氧合指数小于 300mmHg。</p> <p><b>排除标准：</b></p> <p>9. 任何不能让方案安全进行的情况；</p> <p>10. 对洛匹那韦/利托那韦的已知过敏或超敏反应；</p> <p>11. 谷丙转氨酶 (ALT)/谷草转氨酶 (AST) 升高超过正常上限 5 倍；</p> <p>12. 禁用于洛匹那韦/利托那韦治疗且在研究期间不能更换或停用的药物，例如 CYP3A 抑制剂；</p> <p>13. 妊娠：育龄女性妊娠试验阳性；</p> <p>14. 已知 HIV 感染，因为担心如果未与其他抗 HIV 药物联合使用，会对洛匹那韦/利托那韦产生耐药性；</p> <p>15. 患者可能在 72h 内转至非参与医院；</p> <p>16. 研究者认为不适合者。</p> |
| <p><b>样本量</b></p>    | <p>初步估计 160 例</p>                                                                                                                                                                                                                                                                                                                                                                                                      |
| <p><b>研究药物描述</b></p> | <p>3. 洛匹那韦利托那韦片（克力芝®），洛匹那韦是一种 HIV 蛋白酶抑制剂；利托那韦是一种针对 HIV-1 和 HIV-2 天冬氨酸蛋白酶的活性拟肽类抑制剂。</p> <p>规格及主要成份：250mg/片 120 片/瓶。本品为复方制剂，每片含洛匹那韦 200 mg，利托那韦 50 mg。</p> <p>贮藏条件：室温保存（低于 30℃）。</p>                                                                                                                                                                                                                                     |

|           |                               |
|-----------|-------------------------------|
|           | 生产企业：艾伯维                      |
| 研究持续时间    | 自项目通过伦理委员会审查后，直至达到预计样本量或疫情结束。 |
| 参加研究的持续时间 | 从筛选到随机化后的 28 天                |

## 研究设计示意图

本研究是一项多中心、随机、开放、空白对照临床研究，由于尚无有效的治疗措施，项目组将根据根据实际情况，陆续评估可能有效的治疗措施（包括但不限于洛匹那韦/利托那韦，remdesivir，针对冠状病毒的单/多克隆抗体），探索最为优效的抗病毒治疗方案。本阶段将在 160 例新型冠状病毒感染的住院成年患者中评估洛匹那韦/利托那韦与标准治疗相比的有效性和安全性。受试者将按 1:1 的比例分配，接受标准治疗或联合抗病毒治疗。

## 2 研究管理

研究中心：武汉市金银潭医院

## 研究流程图

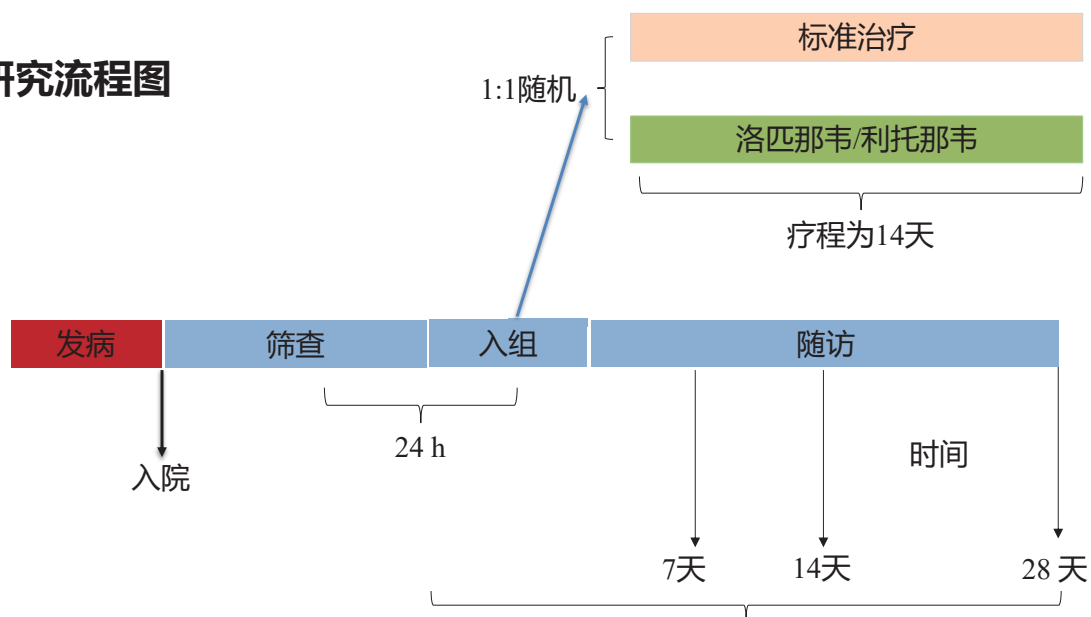

主要终点：随机化后28天临床改善时间；

次要终点：7/14/28天临床改善率；28天病死率；住院时间等；

试验指导委员会

[Redacted text block]

试验执行委员会

[Redacted text block]

**试验登记：**由于是应急项目和相关的保密要求，本方案的详细信息登记在中国临床试验注册中心（chictr.org.cn）。

## 2 引言：背景信息与科学依据

### 2.1 背景信息

新型冠状病毒感染是导致国内外突发公共卫生事件的重要原因，严重影响人民健康和社会稳定。2003 年我国暴发 SRAR-COV 造成了严重的社会影响<sup>1,2</sup>。从 2002 年 1 月至 2003 年 8 月 7 日，全球累计病例共 8422 例，涉及 32 个国家和地区，其中死亡病例 919 例，病死率近 11%，老年患者和合并症患者的病死率更高。2012 年首次报告中东呼吸综合征冠状病毒 (MERS-COV) 感染以来，世界卫生组织已收到来自 27 个国家的 2468 例实验室确诊的 MERS-COV 感染病例通知，至少有 851 例报告死亡（病死率 34.5%）<sup>3</sup>。

目前尚无针对冠状病毒感染的确切有效治疗方法。基于体外数据，洛匹那韦利托那韦被认为是冠状病毒的候选治疗。洛匹那韦和利托那韦是抗逆转录病毒蛋白酶抑制剂，联合用于治疗人类免疫缺陷病毒 (HIV) 感染，且安全性较好<sup>9</sup>。洛匹那韦/利托那韦联合曾用于 SARS 感染的治疗。在该项研究中，与 111 例接受利巴韦林治疗的 SARS 患者相比，41 例患者使用洛匹那韦/利托那韦联合治疗，结果发现症状发作后 21 天的不良临床结局（急性呼吸窘迫综合征或死亡）明显少于利巴韦林单药治疗（2.4%VS. 28.8%，P = 0.001）<sup>10</sup>。然而，历史对照对照的研究数据无法可靠估计有效性。在 2015 年韩国暴发 MERS 的一例病例中，洛匹那韦/利托那韦与利巴韦林和 IFN- $\alpha$ 2A 联合用药可快速退热、加快病毒清除和延迟生存期<sup>5</sup>。另一例来自希腊的病例中，在 MERS 疾病的第 13 天开始接受洛匹那韦/利托那韦联合 IFN 和利巴韦林治疗，2 天后病毒血症清除，但呼吸道分泌物中病毒核酸持续存在，直至疾病第 4 周，患者最终死亡<sup>11</sup>。在韩国 MERS 暴发期间，大多数出现呼吸系统疾病的患者接受了由聚乙二醇干扰素 (IFN)- $\alpha$ 、利巴韦林和洛匹那韦/利托那韦组成的三联抗病毒治疗；然而，缺乏关于这种方法有效性的数据<sup>12</sup>。基于发现以及洛匹那韦/利托那韦和 IFN- $\beta$ 1B 的可用和安全性数据，2015 年日内瓦世界卫生组织召开 MERS 防治大会<sup>13</sup>，认为洛匹那韦/利托那韦联合干扰素治疗具有潜在疗效。

自 2019 年 12 月以来湖北省武汉市多家医院发现不明原因肺炎多例，部分病例核酸和二代测序结果提示为新型冠状病毒感染。鉴于应对此次疫情，无有效抗病毒治疗方案的情况下，国家和当地医疗

救治组紧急启动该项研究，旨在评估洛匹那韦/利托那韦治疗武汉新型冠状病毒感染住院患者的疗效和安全性的随机、开放、空白对照的研究。

## 2.2 潜在风险和获益

### 2.2.1 已知的潜在风险

#### 克力芝

临床试验期间与本品治疗相关的最常见的不良反应为腹泻、恶心、呕吐、高甘油三酯血症和高胆固醇血症。每日一次服用本品的患者发生腹泻的风险可能较大。腹泻、恶心和呕吐在治疗开始的时候就可能出现，高甘油三酯血症和高胆固醇血症可能会稍后出现。在 II-IV 期试验中，有 7% 的受试者因在治疗中出现不良事件而导致提前退出研究。

值得注意的是，接受本品治疗的患者中已有发生胰腺炎的报告，包括那些出现了高甘油三酯血症的患者，绝大多数报告病例中，患者系既往有胰腺炎罹患病史和/或其它可引发胰腺炎的药物进行合并治疗，甘油三酯显著升高是发生胰腺炎的一个危险因素。此外，在本品治疗过程中出现 PR 间期延长的报告极为罕见，如患者存在结构性心脏疾病和原有传导系统异常或者接受可引起 PR 间期延长的药物(如维拉帕米或阿扎那韦)，则在接受洛匹那韦利托那韦后有罕见报道发生 2 度或 3 度房室传导阻滞。

成人患者在临床研究和上市后使用中发生的不良反应：频率分级中包括了所有已报告的中度至重度事件，无论是否存在因果关系。根据身体系统器官分类列出了不良反应，在每个频率分组中，不良反应发生频率按降序排列：极常见  $\geq 1/10$ ；常见  $\geq 1/100, <1/10$ ；不常见  $\geq 1/1000, <1/100$ 。

列表如下，

表 1.成人患者在临床研究和上市后使用中发生的不良反应

| 系统器官分类 | 频率  | 不良反应                    |
|--------|-----|-------------------------|
| 感染和传染病 | 极常见 | 上呼吸道感染                  |
|        | 常见  | 下呼吸道感染、皮肤感染（蜂窝组织炎、毛囊炎等） |

|           |     |                                                |
|-----------|-----|------------------------------------------------|
| 血液和淋巴系统异常 | 常见  | 贫血，白细胞减少，嗜中性白血球减少症、淋巴结病                        |
| 免疫系统异常    | 常见  | 超敏反应，包括荨麻疹和血管性水肿                               |
|           | 不常见 | 免疫重建综合征                                        |
| 内分泌异常     | 常见  | 性腺功能减退症                                        |
| 代谢和营养异常   | 常见  | 包括糖尿病在内的血糖异常，高甘油三酯血症，高胆固醇血症，体重下降，食欲减退          |
|           | 不常见 | 体重增加，食欲增强                                      |
| 精神异常      | 常见  | 焦虑                                             |
|           | 不常见 | 噩梦，性欲降低                                        |
| 神经系统异常    | 常见  | 头痛（包括偏头痛），神经病变（包括外周性神经病变），头晕，失眠                |
|           | 不常见 | 脑血管意外，惊厥，味觉障碍，味觉缺失，震颤                          |
| 眼部异常      | 不常见 | 视觉障碍                                           |
| 耳部和迷路异常   | 不常见 | 耳鸣，眩晕                                          |
| 心脏异常      | 不常见 | 动脉粥样硬化，例如心肌梗死，房室传导阻滞，三尖瓣关闭不全                   |
| 血管系统异常    | 常见  | 高血压                                            |
|           | 不常见 | 深静脉血栓                                          |
| 胃肠功能紊乱    | 极常见 | 腹泻，恶心                                          |
|           | 常见  | 胰腺炎，胃食管反流，肠胃炎和结肠炎，呕吐，腹痛（上腹和下腹），腹胀，消化不良，痔疮，肠胃气胀 |
|           | 不常见 | 消化道出血，包括胃肠溃疡、十二指肠炎、胃炎和                         |

|              |     |                                                     |
|--------------|-----|-----------------------------------------------------|
|              |     | 直肠出血，口腔炎和口腔溃疡，大便失禁，便秘，口干                            |
| 肝胆异常         | 常见  | 肝炎，包括 AST、ALT 和 GGT 增高                              |
|              | 不常见 | 脂肪肝，肝肿大，胆管炎，高胆红素血症                                  |
|              | 不明  | 黄疸                                                  |
| 皮肤和皮下组织异常    | 常见  | 包括面部损毁症在内的获得性脂代谢障碍，包括丘疹在内的皮疹，包括湿疹和皮脂溢在内的皮炎/皮疹，盗汗，瘙痒 |
|              | 不常见 | 脱发，毛细血管炎，血管炎                                        |
|              | 不明  | 斯-约综合征，多形性红斑                                        |
| 骨骼肌肉和结缔组织异常  | 常见  | 肌痛，包括关节痛和背部痛在内的骨骼肌肉痛，肌肉异常，例如虚弱和痉挛                   |
|              | 不常见 | 横纹肌溶解，骨坏死                                           |
| 肾脏和泌尿系统异常    | 不常见 | 肌酐清除率下降，肾炎，血尿                                       |
| 生殖系统和乳腺异常    | 常见  | 勃起功能障碍，月经紊乱-闭经，月经过多                                 |
| 全身性异常和用药部位情况 | 常见  | 疲乏，无力                                               |

备注：给出频率为“不明”的事件在上市后监测中被确认。

### 2.3.2 已知的潜在获益

一般说来，对受试者或社会无明确的获益期望。然而，根据既往临床前和某些情况下的临床研究，认为洛匹那韦/利托那韦为个体受试者提供一些潜在获益。因此，尽管潜在受益（如果有）目前尚不清楚，但是可以认为有证据表明干预措施的发病率和死亡率降低高于比支持治疗。从研究中获得的知识将提供重要信息，有助于更好地了解该药物今后临床试验的设计。

## 3 目的与目标

## 主要目的:

- 评价与标准治疗相比，洛匹那韦/利托那韦治疗新型冠状病毒感染的成人住院患者的疗效和安全性。

## 4 研究设计和观察终点

### 4.1 研究设计描述

本研究是一项多中心、随机、开放标签、空白对照的多阶段临床研究，由于尚无有效的治疗措施，项目组将根据实际情况，陆续评估可能有效的治疗措施（包括但不限于洛匹那韦/利托那韦，remdesivir，针对冠状病毒的单/多克隆抗体），探索最为优效的抗病毒治疗方案。

本阶段将评估，与标准治疗相比，洛匹那韦/利托那韦治疗约 160 例（初步估计）诊断为武汉新型冠状病毒感染的住院成年患者的疗效和安全性。

筛选合适患者，并在筛选后（不超过 24 小时）尽快随机分配。患者将按 1:1 的比例分配，接受洛匹那韦/利托那韦治疗组或仅接受标准治疗组。本研究计划随机入组约 160 例成年受试者。将根据是否需要经鼻高流量及更高强度呼吸支持治疗对受试者进行分层，且按照 1:1 的比例随机分组，接受标准治疗或洛匹那韦/利托那韦口服每日两次给药治疗，疗程为 14 天。受试者和所有研究中心工作人员不设盲。



## 研究流程图

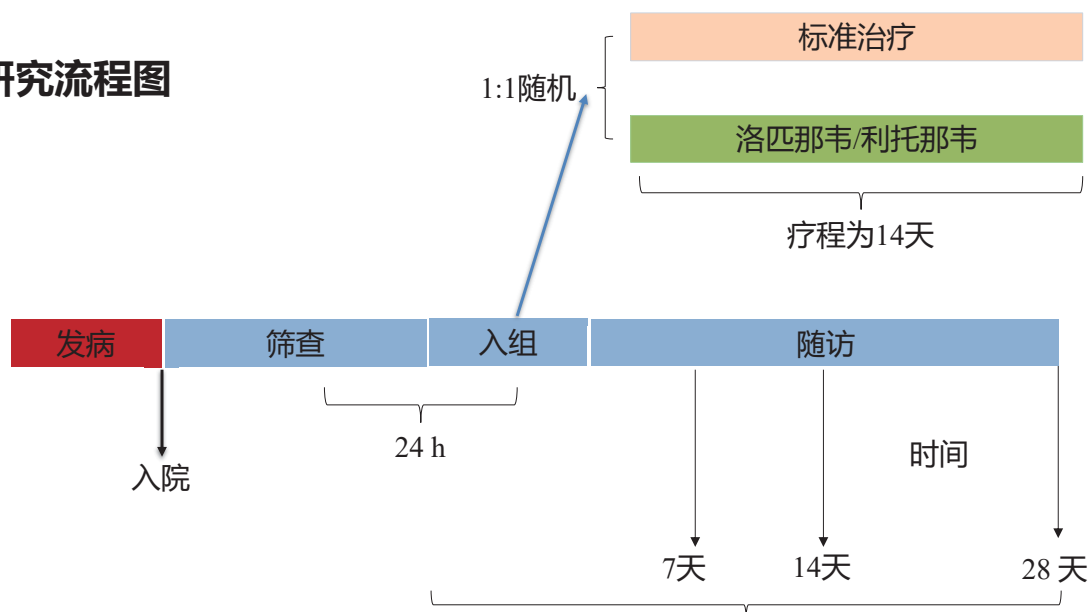

主要终点：随机化后28天临床改善时间；

次要终点：7/14/28天临床改善率；28天病死率；住院时间等；

## 4.2 研究终点

### 4.2.1 主要终点

主要终点：入组 28 天临床改善时间（time to clinical improve）：随机化后至临床改善的天数。临床改善定义为患者入院状态的 7 分等级量表评分降低 2 分或者出院。7 分等级量表包括：7 分：死亡；6 分：住院接受 ECMO 和 / 或机械通气；5 分：住院接受无创通气和 / 或高流量氧疗；4 分：住院接受氧疗；3 分：住院不需要接受氧疗；2 分：出院但未恢复正常功能状态；1 分：出院已恢复正常功能状态。

患者如在临床改善前发生死亡，则主要终点被归类于最差结果，即 28 天未改善。

### 4.2.2 次要终点

10. 随机后第 7、14 和 28 天，7 分等级量表各分类的患者比例；

11. 第 28 天病死率；

12. 机械通气持续时间（天）；
13. 氧疗持续时间（天）；
14. 住院持续时间（天）；
15. 开始治疗后第 7 天，上和 / 或下呼吸道样本新型冠状病毒 RT-PCR 阴性的患者比例；
16. 上和 / 或下呼吸道样本（第 7 天）病毒 PCR 转阴的时间（天）；
17. 严重药物不良事件频率；

## 5 研究入组与退出

### 5.1 受试者入选标准

#### 入选标准

5. 成人（定义为年龄 $\geq 18$  岁）；
6. PCR 确证的新型冠状病毒感染患者；
7. 静息未吸氧状态下，患者  $SPO_2 \leq 94\%$ ，或  $PaO_2/FiO_2 \leq 300\text{mmHg}$ 。

### 5.2 受试者排除标准

#### 排除标准

9. 任何不能让方案安全进行的情况；
10. 对洛匹那韦/利托那韦的已知过敏或超敏反应；
11. 谷丙转氨酶 (ALT)/谷草转氨酶升高超过正常上限 5 倍；
12. 禁用于洛匹那韦/利托那韦治疗且在研究期间不能更换或停用的药物，例如 CYP3A 抑制剂；

13. 妊娠：育龄女性妊娠试验阳性；

14. 已知 HIV 感染，因为担心如果未与其他抗 HIV 药物联合使用，会对洛匹那韦/利托那韦产生耐药性；

15. 患者可能在 72h 内转至非参与医院；

### 5.3 招募和保留策略

患者将在收治不明原因的病毒性肺炎的医院进行筛选。图 1.表示筛选过程。

### 5.4 受试者退出或终止试验

#### 5.4.1 退出或终止的原因

研究者应尽可能促成每一个受试者完成整个研究过程。受试者可能因为任何原因从本研究中退出，**试验用药物停药的标准：**

1) 出现严重的或者不可耐受的不良反应事件，同时研究者判断受试者因为该不良事件需要退出本研究。

- 药物不耐受或不可接受的 AE。
- 没有强有力的证据表明 AE 与试验用药物不相关的任何 4 级 AE 或毒性。
- 研究者认为具有有临床意义的实验室检查结果提示需要停止使用研究药物。
- 类过敏反应（包括口咽水肿、严重皮疹和速发型过敏反应）：受试者必须永久停用试验用药物，并采取适当的治疗。
- 支气管痉挛：任何发生支气管痉挛的受试者必须永久停用试验用药物，并进行适当临床管理。
- 肝脏化学停止的标准定义如下：
  - d.  $ALT \geq 3 \times ULN$  和胆红素  $\geq 2 \times ULN$  (>35%直接胆红素)

注：如果  $ALT \geq 3 \times ULN$  和胆红素  $\geq 2 \times ULN$ ，无法立即进行血清胆红素分离，则应停用研究药物。如果检测可用，则应进行血清胆红素分离。如果检测不可用，则在试纸上检测尿胆红素，阳性表明直接胆红素升高并提示出现肝损伤。

e.  $ALT \geq 5 \times ULN$ 。

f.  $ALT \geq 3 \times ULN$ ，如果与出现肝炎或超敏反应症状或症状恶化相关，如疲乏、恶心、呕吐、右上腹痛或压痛、发热、皮疹或嗜酸性粒细胞增多。

2) 研究者要求退出研究。

3) 当患者出现急性肾损伤需要接受肾脏替代治疗如下：

如果在干预组未接受 CRRT 治疗，肌酐清除率下降至 $\leq 10$  mL/min，则应停止试验用药物给药，并对受试者进行随访或退出研究。但是，对于已经完成随机后的 14 天治疗，期间未接受 CRRT 且肌酐清除率下降至者 $\leq 10$  mL/min 的受试者，无需退出研究。

4) 研究者还可以根据具体情况决定受试者是否退出研究。

一旦受试者退出研究，研究者应该尽快通知监察单位或者组长单位，并尽最大努力完成退出前的评估。所有因不良事件退出研究的受试者，应该随访直至不良事件完全缓解，经过研究者判断不良事件已经处于稳定期或者失访。对于所有退出研究的受试者，应该在 CRF 表格上详细记录退出日期和退出原因等。

#### 5.4.2 受试者撤回或终止研究的处理

受试者可以在任何时间终止参与研究，且不会受到偏见。如果受试者终止研究，则将此原因记录于纸质 CRF。如果受试者未完成 7 天的随机化治疗，则认为受试者提前停用试验用药物。如果受试者提前终止试验用药物，研究者必须尽力完成所有剩余的研究访视，如时间和事件表所述，包括随机化后 28 天的末次访视。

负责患者护理的临床医生也可以让患者随时退出试验。根据主治临床医生的判断，如果患者退出试验治疗，则将接受常规治疗。在这种情况下，患者仍在试验内，以进行随访和数据分析。如果患者希望退出试验治疗，研究中心应该解释留在研究中对试验随访的重要性，或如果做不到则允许将常规随访数据用于试验目的，及允许使用现有采集的数据。

## 6 研究药物

### 6.1 研究药物

#### 6.1.1 药品

克力芝（洛匹那韦/利托那韦）2 片 BID 通过口服给药，对于无法吞咽的患者通过胃管给予洛匹那韦/利托那韦研磨后的混悬液。

本次研究采取开放标签的，标准治疗对照设计。因此，仅有干预组将会接受在标准治疗的基础上添加克力芝治疗。

### 6.1.2 产品储存和稳定性

在正常处理和给药条件下，试验用药物预期不会给研究中心工作人员带来显著的安全性风险。试验用药（克力芝）必须在温度 30°C（87°F）以下的适当物理条件下储存于安全区域。试验用药物的获取和给药将仅限于研究者或指定人员。试验用药物必须仅分发给或给予入组研究且符合方案的受试者。

### 6.1.3 药物制备

对于能够吞咽完整片剂的受试者，研究护士应将研究药物的确切剂量分配给患者并监测用药过程。

对于无法吞咽完整片剂的受试者，研究护士可将药品研磨并将研磨物倾倒在适量的加温水中。应搅拌混合物，且受试者需口服全部混合物。

### 6.1.4 用量用法

受试者将被随机分配至以下任一治疗组。

| 组别  | 剂量与给药间隔                                                    |
|-----|------------------------------------------------------------|
| A 组 | 标准治疗+洛匹那韦/利托那韦（400 mg 洛匹那韦 /100 mg 利托那韦），每 12h 一次，持续 14 天。 |
| B 组 | 标准治疗                                                       |

### 6.1.5 治疗持续时间

随机化治疗持续时间为 14 天。如果患者在 14 天内出院回家，则将停用联合抗病毒治疗。

### 6.1.6 剂量跟踪

研究中心的护理人员将给予研究药物并填写相应原始表格，以监测治疗依从性。

## 6.2 研究药物清点程序

研究者指定的研究中心工作人员或医疗机构负责人将保存准确和充分的记录，包括接收日期、批号 / 失效日期、药物运输数量以及研究药物分发和返还的日期和数量。在研究结束时，经项目组同意，按照研究中心销毁程序与医院废物管理政策，在研究中心销毁未经分配、未使用和使用的研究药物。将保存销毁记录。

## 7 研究程序和时间表

### 7.1 研究程序 / 评价

#### 7.1.1 研究特殊流程

由于本次疾病为新发突发呼吸道传染病，在尚未研发出快速诊断试剂盒的情况下，将由临床医生判定患者是否符合临床诊断标准。若经过临床医生判定患者符合疾病定义，可考虑纳入本研究。

#### 7.1.2 标准治疗研究程序

除抗病毒药外，两个研究组的患者将接受标准支持性治疗（例如，根据每日基础需求口服或肠外营养、下肢深静脉血栓预防、抗生素治疗、辅助氧气或机械通气等），由治疗团队酌情决定。将向治疗团队提供与最佳临床实践和国家卫健委制定的《不明原因的病毒性肺炎诊疗方案（试行）》一致的现行标准治疗建议。

### 7.2 实验室程序 / 评价

#### 7.2.1 临床实验室评价

##### 临床安全性实验室检查

参见评价时间表（表 1）。应在住院期间进行检测，此后，根据临床指征，额外进行检测：

- CBC 分类
- 肾功能检查=肌酐、氯化物、肌酐、血糖、尿素、尿酸、钾、钠
- 肝功能检查=AST、ALT、白蛋白，肌酸激酶、乳酸脱氢酶、总胆红素、碱性磷酸酶
- 凝血常规：APTT，PT，INR

#### 7.2.2 其他检测或程序

在有条件的研究中心，所有患者均进行微生物学筛查，包括痰培养，两套血液培养，和尿抗原的肺炎链球菌、肺炎支原体和肺军团菌。用快速免疫法检测尿中的肺炎链球菌抗原。呼吸系统感染微生物学评估也可以使用其他标本包括胸水、气管内吸出物（预定阈值  $10^5$  cfu / 毫升）和支气管镜定量培养和支气管肺泡灌洗（预定义阈值  $10^4$  cfu / 毫升）等，但该部分内容不作为强制要求，根据各研究中心具体诊疗情况而定。

在抗菌药物治疗开始前，采集痰液和血液进行细菌培养。在入院后 24 小时内获得肺炎链球菌、肺炎支原体和军团菌抗原检测的尿样。

#### 7.2.4 样本制备、处理和储存

密封的呼吸道标本将保存在  $-80^{\circ}\text{C}$  冰箱。将仅用唯一的研究代码标记样本。将样本储存并定期运送至中心实验室。

#### 7.2.4 样本运输

鼻咽拭子、下呼吸道样本（如有）和血浆样本将在研究中心冷冻储存，并用干冰运送至规定检测机构。有关病毒学样本的制备和储存的其他说明，包括贴标和运输，将严格按照武汉市卫健委下发《不明原因的病毒性肺炎病毒学检测样本管理方案》执行。样本将在暂于研究中心冷冻储存，直至分析或按需要调配至其他处。

#### 7.2.5 样本的预期用途

根据研究方案收集的样本和数据将用于确定干预药物的安全性、抗病毒作用、抗体的产生、对免疫反应的影响以及药代动力学。病毒特定的检测项目包括：病毒定性和定量。

### 7.3 研究时间表

#### 7.3.1 筛选

图 1. 筛选流程。

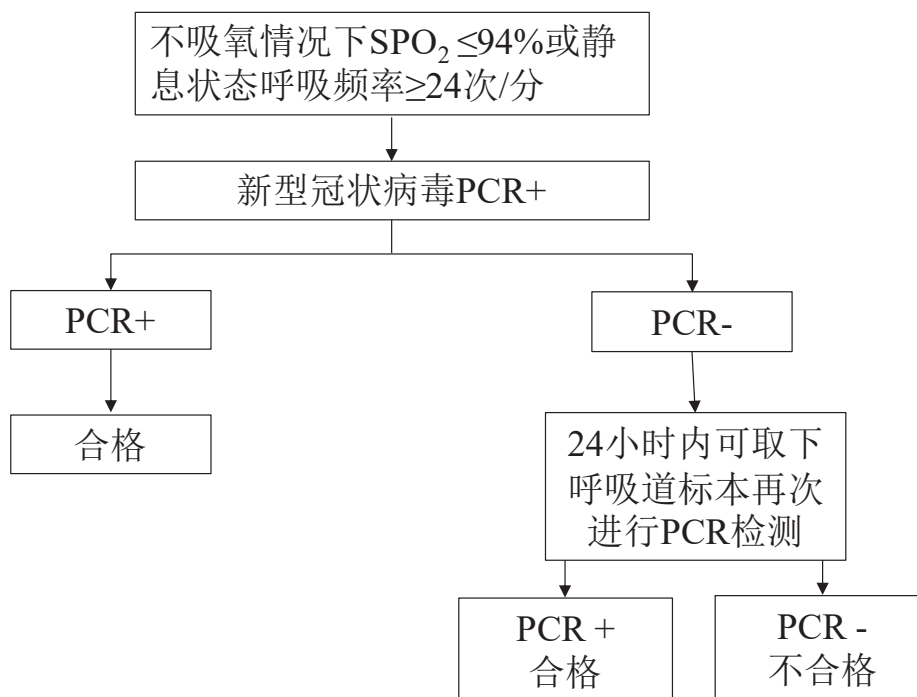

筛选标准为:

2019-nCoV 的 PCR 阳性

且入院时，未吸氧的氧饱和度 $\leq 94\%$ （或已经出现呼吸衰竭需要氧疗）。

筛选失败定义为受试者签署知情同意参加本研究，但是后续随机过程前即退出研究。以下信息需要记录在 CRF 表格中：知情同意日期，患者基本状况信息，入排标准的违背详细信息，筛选失败的原因，任何可能导致筛选失败的不良和严重不良事件。

### 7.3.2 入组 / 基线

一旦确认入选和排除标准，应尽快（ $< 24$  小时）进行研究入组，根据记载的入选标准，可接受的最长时间为 24 小时。

#### 人口学资料

应从受试者或相关人员获取并记录的以下信息：（年龄、性别、种族和人种）

#### 第 0 天

##### 基线评价

##### 病史



应记录以下信息：

- 当前症状：包括发热、咽喉痛、咳嗽、疲乏、虚弱、头晕、意识模糊、头痛、肌痛、呕吐、腹泻、症状、腹痛、胸痛、呼吸困难等。

### 临床数据

- 生命体征（体温、心率、呼吸速率、血压），氧饱和度（如可能）
- 体重（实际或估计） / 身高
- 每进行日 NEWS2 评分比较基线的变化
- 每进行日 7 分等级量表评分

### 基线实验室检查

将进行以下检查并记录为基线测定值（如可能）。基线实验室检查应在研究入组后 24 小时内进行（随机化）。

基线实验室：

- CBC 分类。
- 肾功能检查=肌酐、氯化物、肌酐、血糖、尿素、钾、钠和尿酸。
- 肝功能检查=AST、ALT、白蛋白、肌酸激酶、乳酸脱氢酶、总胆红素、碱性磷酸酶。
- 凝血常规：APTT，PT，INR
- 动脉血气分析（必要时）

### 7.3.3 随访

在评价时间表中概述了研究药物给药计划、临床评估和实验室监测。

主要结局的随访将直至死亡或随机化后 28 天，以先发生者为准。将记录第 28 天的生命状态、ICU 住院时间、住院时间、死亡日期和死亡原因（如适用）。

与评估相关的详细信息如下所示：

#### 随访日常评估和优化的支持治疗

将包括以下内容：

- 每日评估 7 分等级量表及 NEWS2
- 目前的症状或状况

- 生命体征
- 接受的最佳支持治疗（有创机械通气、CRRT、ECMO 和营养支持记录）
- 研究药物给药（如适用）
- 实验室（酌情开展）
- 任何严重不良事件
- 出院 / 结局信息（如适用）

---

#### 7.3.4 最终研究访视

本研究的主要终点是入院 28 天临床改善时间（time to clinical improvement）：随机化后至临床改善的天数。因此，第 28 天访视对于该终点需要的数据至关重要。应尽一切努力确保及时完成本研究访视。首次给药后 28±3 天进行最终评估，仅涉及临床评估。

此外，出院当天将达到出院标准，将根据卫健委《不明原因的病毒性肺炎诊疗方案（试行）》执行。对于已经出院的患者，可以通过电话与使用问卷（如适用）进行最终评估。

---

#### 7.3.5 提前退出访视

- 研究药物相关严重不良事件
- 出院；
- 死亡；
- 患者退出或患者退出研究的相关要求；
- 根据临床医生的决定，应该出于安全性原因停用研究药物

7.3.6 事件时间表

表 1

| 程序                                     | 基线 B/L | D1 | D5 | D10 | D14 | D21 | D28 | 半年后 |
|----------------------------------------|--------|----|----|-----|-----|-----|-----|-----|
| 入选 / 排除标准                              | X      |    |    |     |     |     |     |     |
| 书面知情同意                                 | X      |    |    |     |     |     |     |     |
| 受试者人口学                                 | X      |    |    |     |     |     |     |     |
| 慢性基础疾病评估                               | X      |    |    |     |     |     |     |     |
| 疗效/安全性评估                               |        |    |    |     |     |     |     |     |
| 心电图                                    | X      |    |    |     | X   |     |     |     |
| 胸部影像学检查 <sup>a</sup>                   | X      |    |    |     |     | X   |     | X   |
| 并发症记录                                  | X      | X  | X  | X   | X   | X   | X   | X   |
| 生命体征（体温、心率、血压、呼吸速率、氧饱和度等） <sup>b</sup> | X      | X  | X  | X   | X   | X   | X   | X   |

|                                            |   |   |   |   |   |   |   |   |
|--------------------------------------------|---|---|---|---|---|---|---|---|
| NEWS2 评分 <sup>c</sup>                      | X | X | X | X | X | X | X | X |
| 患者入院状态的 7 分等级量表评分                          | X | X | X | X | X | X | X | X |
| <b>实验室评估</b>                               |   |   |   |   |   |   |   |   |
| 诊断（临床诊断或病原诊断）                              | X |   |   |   |   |   |   |   |
| 合并感染的全面微生物学评估（采集时间）                        | X |   |   |   |   |   |   |   |
| 全血细胞计数（采集时间）                               | X |   | X |   |   | X |   |   |
| 凝血常规（采集时间）                                 | X |   | X |   |   | X |   |   |
| 肾脏和肝功能检查 <sup>d</sup> （采集时间）               | X |   | X |   |   | X |   |   |
| 鼻咽拭子样本或下呼吸道标本（痰液/气管内吸出物/balf） <sup>e</sup> | X | X | X | X | X | X | X |   |
| 肛拭子样本                                      | X | X | X | X | X | X | X |   |
| 血浆标本                                       | X | X | X | X | X | X | X |   |
| <b>试验用药物</b>                               |   |   |   |   |   |   |   |   |
| 研究药物给药                                     |   | X | X | X | X | X | X |   |

|      |   |   |   |   |   |   |   |  |
|------|---|---|---|---|---|---|---|--|
| 合并用药 | X | X | X | X | X | X | X |  |
| 不良事件 | X | X | X | X | X | X | X |  |

28 天的随访期包括临床、病毒学 and 安全性评估。在患者住院期间进行日常评估，如果患者在 28 天时已经出院，则进行电话访视。

- a. 如适用，在纸质 CRF 中记录基线后 48 小时内接受的任何胸部影像学检查结果。该评估不具有强制性。
- b. 治疗期间 / 住院期间，每天评估生命体征和通气状态。
- c. 如果患者已经出院，生命体征和评分则无需评估。

#### NEWS2 评分表

| Physiological parameter        | Score |        |           |                     |                 |                 |               |
|--------------------------------|-------|--------|-----------|---------------------|-----------------|-----------------|---------------|
|                                | 3     | 2      | 1         | 0                   | 1               | 2               | 3             |
| Respiration rate (per minute)  | ≤8    |        | 9–11      | 12–20               |                 | 21–24           | ≥25           |
| SpO <sub>2</sub> Scale 1 (%)   | ≤91   | 92–93  | 94–95     | ≤96                 |                 |                 |               |
| SpO <sub>2</sub> Scale 2 (%)   | ≤83   | 84–85  | 86–87     | 88–92<br>≤93 on air | 93–94 on oxygen | 95–96 on oxygen | ≥97 on oxygen |
| Air or oxygen?                 |       | Oxygen |           | Air                 |                 |                 |               |
| Systolic blood pressure (mmHg) | ≤90   | 91–100 | 101–110   | 111–219             |                 |                 | ≥220          |
| Pulse (per minute)             | ≤40   |        | 41–50     | 51–90               | 91–110          | 111–130         | ≥131          |
| Consciousness                  |       |        |           | Alert               |                 |                 | CVPU          |
| Temperature (°C)               | ≤35.0 |        | 35.1–36.0 | 36.1–38.0           | 38.1–39.0       | ≥39.1           |               |

d. 肾功能检查：肌酐，血糖，尿素，尿酸，血清钾和钠。肝功能检查：AST，ALT，白蛋白，碱性磷酸酶，肌酸激酶，乳酸脱氢酶，总胆红素，血脂

e. 下呼吸道标本，仅针对未接受气管插管的患者。

BALF，支气管肺泡灌洗；BP，血压；CrCl，肌酐清除率；ECG，心电图；纸质 CRF，电子病例报告表；HR，心率；IP，试验用药物；IV，静脉。

## 7.4 合并药物、治疗和程序

主治医生可酌情决定支持治疗和合并治疗。

将汇总以下合并治疗，如：

抗菌药物（如适用）

扑热息痛（如适用）

白蛋白（如适用）

神经肌肉阻滞剂（如适用）

氧疗（鼻插管、肺保护性机械通气、ECMO 等）

肾脏替代治疗（如适用）

正性肌力药和血管加压药（如适用）

悬浮红细胞和血浆输注（如适用）

### 7.4.1 需要注意的药物、治疗和程序

克力芝是国家食品药品监督管理局已经批准上市药物。在本研究培训后，主治临床医生应了解研究药物产品信息中的列出的注意事项和潜在不良反应。**注意和以下药物同时使用，可考虑使用替代药物。**

表. 洛匹那韦/利托那韦与重症监护室常用药物的相互作用

| 药物  | 可能的相互作用                                     | 管理                                  | 入组时采取的措施                    | 入组之后的措施                                                                                    |
|-----|---------------------------------------------|-------------------------------------|-----------------------------|--------------------------------------------------------------------------------------------|
| 胺碘酮 | 增加胺碘酮毒性的风险（低血压、心动过缓、窦性停搏）。<br><br>QT 间期延长增加 | 禁忌同时使用                              | 在入选时，没有其他选择的胺碘酮治疗是排除标准      | 考虑替代胺碘酮。<br><br>如果没有胺碘酮的替代选择，考虑减少剂量。<br><br>监测血清中胺碘酮浓度是否升高，肝功能检查结果是否发生变化<br><br>QT 间期延长的证据 |
| 芬太尼 | 同时使用芬太尼与 CYP3A4 抑制剂可能导致芬太尼毒性风险升高，导致致死性呼吸抑制。 | 在非机械通气患者中，禁忌同时使用。<br><br>对于机械通气的患者， | 考虑替代芬太尼。<br><br>使用低剂量并调整剂量以 | 考虑替代芬太尼。<br><br>使用低剂量并调整剂量以                                                                |

|        |                                                         |                                                                    |                                                                      |                                                                                                                        |
|--------|---------------------------------------------------------|--------------------------------------------------------------------|----------------------------------------------------------------------|------------------------------------------------------------------------------------------------------------------------|
|        |                                                         | 避免使用芬太尼或减少剂量                                                       | 达到目标镇痛和镇静作用                                                          | 达到目标镇痛和镇静作用                                                                                                            |
| 1) 氟康唑 | 利托那韦暴露量增加和 QT 间期延长风险                                    | 尽可能避免伴随用药<br><br>如果需要氟康唑，密切监测心电图是否出现 QT 间期延长                       | 使用氟康唑的替代品                                                            | 使用氟康唑的替代品。<br><br>氟康唑介导的 CYP3A4 抑制可能在停药后持续 4-5 天，因为其半衰期长                                                               |
| 咪达唑仑   | 咪达唑仑血浆浓度升高，可导致咪达唑仑毒性                                    | 在非机械通气患者中，禁忌同时使用。<br><br>在机械通气患者中，尽可能避免使用咪达唑仑。必要时，减少咪达唑仑的剂量并监测不良反应 | 考虑咪达唑仑的替代品。<br><br>使用较低剂量并调整剂量以达到目标镇静作用                              | 考虑咪达唑仑的替代品。<br><br>使用较低剂量并调整剂量以达到目标镇静作用。<br><br>如果需要同时使用咪达唑仑和洛匹那韦/利托那韦，密切监测患者是否出现咪达唑仑不良作用（过度镇静、意识模糊和呼吸抑制），并考虑减少咪达唑仑的剂量 |
| 奎硫平    | QT 间期延长的风险增加，尖端扭转型室性心动过速或其他明显的室性快速性心律失常                 | 禁忌伴随给药                                                             | 使用喹硫平的替代药物                                                           | 使用喹硫平的替代药物。如果需要合并用药，将喹硫平的剂量降低至标准剂量的六分之一，当停用洛匹那韦/利托那韦，随后应将喹硫平的剂量增加至标准剂量。                                                |
| 利福平    | 降低洛匹那韦/利托那韦的血浆浓度。<br><br>利福平可能增强洛匹那韦的毒性作用，特别是增加肝细胞毒性的风险 | 禁忌同时使用                                                             | 如果需要合并用药，建议利福布丁 150 mg，隔日 1 次或 150 mg，每周 3 次与洛匹那韦/利托那韦合并用药。          | 如果需要合并用药，建议利福布丁 150 mg，隔日 1 次或 150 mg，每周 3 次与洛匹那韦/利托那韦合并用药。                                                            |
| 西地那非   | 增加西地那非血浆水平，从而增加西地那非不良反应的风险（低血压、视觉变化和阴茎异常勃起）             | 禁忌同时使用洛匹那韦/利托那韦和西地那非                                               | 如果可能，停用西地那非。如果不可能，使用西地那非是本研究的排除标准                                    | 请勿使用西地那非                                                                                                               |
| 辛伐他汀   | 肌病或横纹肌溶解风险增加                                            | 禁忌洛匹那韦/利托那韦与辛伐他汀合并用药                                               | 如果可能，停止辛伐他汀。如果需要的话，考虑氟伐他汀、匹伐他汀或普伐他汀作为替代治疗，因为这些药物的治疗潜力最小。<br><br>相互作用 | 不要使用辛伐他汀。<br><br>如果需要，考虑氟伐他汀、匹伐他汀或普伐他汀作为替代治疗，因为这些药物的可能性最小<br><br>用于交互                                                  |



|       |                                |                       |                                           |                                                                                           |
|-------|--------------------------------|-----------------------|-------------------------------------------|-------------------------------------------------------------------------------------------|
| 阿托伐他汀 | 阿托伐他汀 AUC 增加 488%。肌病或横纹肌溶解风险增加 | 监测阿托伐他汀毒性体征（横纹肌溶解和肌病） | 考虑停用阿托伐他汀。如果不能停药，应慎用于给药范围的下限（每天 10–40 mg） | 考虑其他药物（普伐他汀、氟伐他汀或瑞舒伐他汀），因为这些药物的相互作用可能性最小                                                  |
| 伏立康唑  | 伏立康唑血浆浓度降低，伏立康唑疗效下降            | 禁忌伴随给药                | 使用伏立康唑的替代药物。如果没有其他选择，伏立康唑用药是本研究的排除标准      | 使用伏立康唑的替代药物或在治疗药物监测下使用。可能需要增加伏立康唑的剂量。如果没有其他选择，停用洛匹那韦/利托那韦，继续使用 IFN-β1b。<br>考虑其他抗真菌药治疗曲霉菌病 |
| 苯妥英钠  | 苯妥英和利托那韦的血浆浓度可能降低              | 慎用                    | 慎用                                        | 在同时给药过程中，监测苯妥英浓度。可能需要调整苯妥英或磷苯妥英的剂量                                                        |

本表中的信息来自词汇表 (<http://www.wolterskluwer.com/词典在线/>) 和 Micromedex (<https://www.micromedexsolutions.com/家庭/调度>)。缩略词：AUC（接收器工作特征）曲线下面积，*cyp3a4* 细胞色素 P450-3A4

## 7.5 慎用药物、治疗和程序

- 3) 大剂量糖皮质激素治疗新型冠状病毒。高剂量皮质类固醇定义为泼尼松龙超过 50 mg / 天、氢化可的松超过 200 mg / 天、甲泼尼龙超过 40 mg / 天。允许使用大剂量糖皮质激素治疗其他疾病（如感染性休克等）。
- 4) 中药：具有缓解或者抗病毒作用效果的中药

## 7.6 急救药物、治疗和程序

如果在 14 天的疗程内，患者出现顽固性低氧血症，需要使用 ECMO；没有使用 ECMO 经验的中心可将患者转入到具有较高 ECMO 水平的中心；如果接受 ECMO 治疗，需要详细记录 ECMO 的参数和运行情况。

## 7.7 研究关闭后受试者的研究药物获取

在完成 14 天疗程后，受试者将不再获得研究所提供药物。

# 8 安全性评估

## 8.1 安全性参数质量标准

| 术语            | 定义                                                                            |
|---------------|-------------------------------------------------------------------------------|
| 不良事件 (AE)     | 患者或临床试验受试者给药后出现的任何不利医学事件,与本治疗不一定存在因果关系。                                       |
| 不良反应 (AR)     | 与给予任何剂量的研究性药物相关的任何不良和非预期反应。                                                   |
| 非预期不良反应 (UAR) | 是指其性质或严重程度与可用产品信息 (例如,未批准试验用药物的研究者手册,或已批准药物的产品特征概要) 不符的不良反应,或根据药物特性预料不到的不良反应。 |

|                                                      |                                                                                                                            |
|------------------------------------------------------|----------------------------------------------------------------------------------------------------------------------------|
| <b>严重不良事件 (SAE)、严重不良反应 (SAR)、疑似非预期严重不良反应 (SUSAR)</b> | 严重不良事件、不良反应或非预期严重不良反应分别为：a) 导致死亡；b) 危及生命；c) 需要住院治疗或延长现有住院时间；d) 导致持续性或严重残疾或失能；e) 是先天性畸形或出生缺陷；f) 是携带真实、非假设、上述结局之一的任何其他重要医学事件 |
|------------------------------------------------------|----------------------------------------------------------------------------------------------------------------------------|

### 8.1.1 不良事件 (AE) 的定义

不良事件是人类受试者发生的任何不良或不利的医学事件，包括与受试者参加研究存在时间关联的任何异常体征（例如，异常体格检查或实验室检查结果）、症状或疾病，无论是否认为与研究相关。

### 8.1.2 严重不良事件 (SAE) 的定义

严重不良事件的定义为符合下列标准的任何不良医学事件：

- 导致死亡
- 危及生命
- 需要患者住院或延长已住院患者的住院时间
- 导致持续性或严重残疾 / 失能
- 属于先天性异常 / 出生缺陷

### 8.1.3 非预期问题 (UP) 的定义

非预期问题是在性质、严重程度或频率方面与 IRB 批准的研究方案和知情同意文件中描述的研究风险有关的任何非预期事件、事情、经验或结局；研究者手册或其他研究文件；正接受研究的受试者人群特征（新型冠状病毒感染患者）；可能、很可能或肯定与参加研究相关；带给受试者或其他人的危害风险高于既往已知或公认的风险（包括身体、心理、经济或社会危害）。

## 8.2 不良事件分类

### 8.2.1 事件严重程度

研究者将根据分级成人和儿童不良事件的 CTCAE 表（版本 4.0），对每起 AE 的严重程度进行分级，见于：

<http://www.niaid.nih.gov/labsandresources/resources/daidsclinrsrch/documents/daidsaegradingtable.pdf>

严重性：

各个中心的主要研究者或者授权者需要根据以下等级相应的评估每个 AE 的严重程度：

1 = 轻度

2 = 中度

3 = 重度

4 = 危及生命

5 = 死亡

### 8.2.2 与研究药物的关系

不良事件与给药的关系：

**绝对不相关：**与研究药物无关，与其他因素，如原发性病、并发症或其他药物给药相关。

**可能无关：**与研究药物无明确的关系，可能与其他因素，如原发性病、并发症或其他药物给药相关。

**可能相关：**与研究药物明确相关，高度疑似与研究药物有关，但不能排除与其他因素（如原发性病、并发症或其他药物给药）之间的关系。

**非常可能相关：**与研究药物明确相关，且可排除与其他因素（如原发性病、并发症或其他药物给药）之间的关系。

**高度相关：**与研究药物明确相关，可排除与其他因素（如原病、并发症或其他药物给药）之间的关系，重新使用研究药物后再次出现不良事件。

上述最后 3 种事件应按照与研究药物相关的不良反应进行处理。

### 8.2.3 可预期的严重不良事件

各个中心的主要研究者或者授权者需要对每个严重不良事件（SAE）判定是否为预期或者非预期，无论该 SAE 是否与研究操作有关。列举在表格 2 中的 SAE 为预期严重不良事件

表格 2

| 预期严重不良事件 | n (%) |
|----------|-------|
|          |       |

|                                   |  |
|-----------------------------------|--|
| 共感染（包括细菌和真菌，入院 48 小时内送检标本培养出的致病菌） |  |
| 继发感染（超过 48 小时，培养出的致病菌）            |  |
| 急性呼吸窘迫综合症                         |  |
| 感染性休克                             |  |
| 急性肾损伤                             |  |
| 急性心肌梗死                            |  |
| 急性心力衰竭                            |  |
| 水电解质酸碱平衡紊乱                        |  |
| 急性肺栓塞                             |  |
| 急性肝损伤                             |  |
| 病毒性心肌炎                            |  |
| 横纹肌溶解                             |  |
| 侵入性的重症支持治疗相关并发症（导管相关血流感染等）        |  |

#### 非预期严重不良事件

如果出现致死或危及生命的严重不良事件不在表格 2 中所列，则为非预期的严重不良事件。

### 8.3 事件评估和随访的时间期限和频率

从患者同意参加该研究至随访第 28 天，研究者或授权人员负责发现、记录和报告符合 AE 或 SAE 定义的事件。

必须持续随访所有 SAE 直至消退。如果在提交初始报告时 SAE 尚未消退，PI 或其他授权的研究中心研究者必须提供 SAE 随访报告。

将在与上述 AE 相同的时间段内采集 SAE。但是，任何经评估与参加研究**相关**或与合并药物相关的 SAE。所有 SAE 将在 24 小时内向**协调中心（武汉市金银潭医院或者项目组）**报告。

## 8.4 报告程序

### 8.4.1 不良事件报告

参加试验的严重冠状病毒患者多合并 ARDS，其基线死亡率很高。因此，患者发生 AE 的风险增加。预计会发生许多此类事件可能与患者的病情和相应的治疗相关，而可能与试验无关。因此很多作为原发疾病过程的自然史或危重疾病的预期并发症的一部分的事件已经被纸质 CRF 采集

已定义并作为并发症和研究终点的事件（如入住 ICU，需要机械通气/ ECMO 和死亡）等信息不会被作为不良事件或 SAE 单独报告，除非经过研究者判断，它们被认为与研究干预有因果关系或者是其他考虑。

异常实验室检查结果（例如：血液学、临床生化，或尿分析），经研究者判断认为具有临床意义，与疾病进展关系不大，均应记录为 AE 或 SAE。但是，与基础疾病有关的任何具有临床意义的安全性评估，除非研究者判定为受试者病情比预期的更严重，则**不会**报告为 AE 或 SAE。预期的严重不良时间列在 8.2 部分，表格 2。

入组和随访 28 天内发生的所有其他 AE 必须记录在患者医疗记录和纸质 CRF 中。必须记录有关事件发生日期，严重程度和试验治疗相关性的信息（定义上）。

SAE 报告的最低限度信息将包括：

- 患者姓名首字母缩写和研究编号
- 事件性质
- 事件开始和结束
- 主要或合作研究者对研究药物与事件之间关系的判定（可能、很可能或肯定相关）
- 事件是否需要治疗以及给予何种治疗。

### 8.4.2 严重不良事件报告

“严重不良事件”分类与不良事件严重程度的评估无关。基于上述标准，严重程度为轻度的事件可归类为严重不良事件。鉴于危重患者在 ICU 住院期间可能发生上述任何已收录的 SAE 标准，参与研究中心的工作人员获知事件后 24 小时内，仅将认为与研究治疗相关的 SAE 报告给监查员 / PI。主治医师认为与研究治疗无关的严重不良事件将通过电子病例报告表报告给协调中心。如上所述，作

为原发疾病过程的自然病史或预期的危重病并发症的一部分的 SAE 在本试验中不会被报告为严重不良事件。

注意:

SAE 上报要求:

上报 SAE 是研究者主要职责: 研究者按照相关 SOP 在获知 24 小时内上报主要研究者、伦理委员会等, 并定期向当地伦理委员会汇报。

首次报告: 获知发生 SAE 的 24 小时内

随访报告: 获知 SAE 产生重要节点的 24 小时内

总结报告: 获知 SAE 结束的 24 小时内

报告文件: 使用 NMPA 统一的 SAE 报告表

报告方式: 可以使用微信、邮箱、电话等方式 (非注册临床试验)

联系方式:

[REDACTED]

将每月汇总的全国 SAE 报告汇总给组长单位主要研究者, 组长单位研究者再按照伦理委员会要求, 按月或季度汇总递交伦理。

不良事件报告流程图

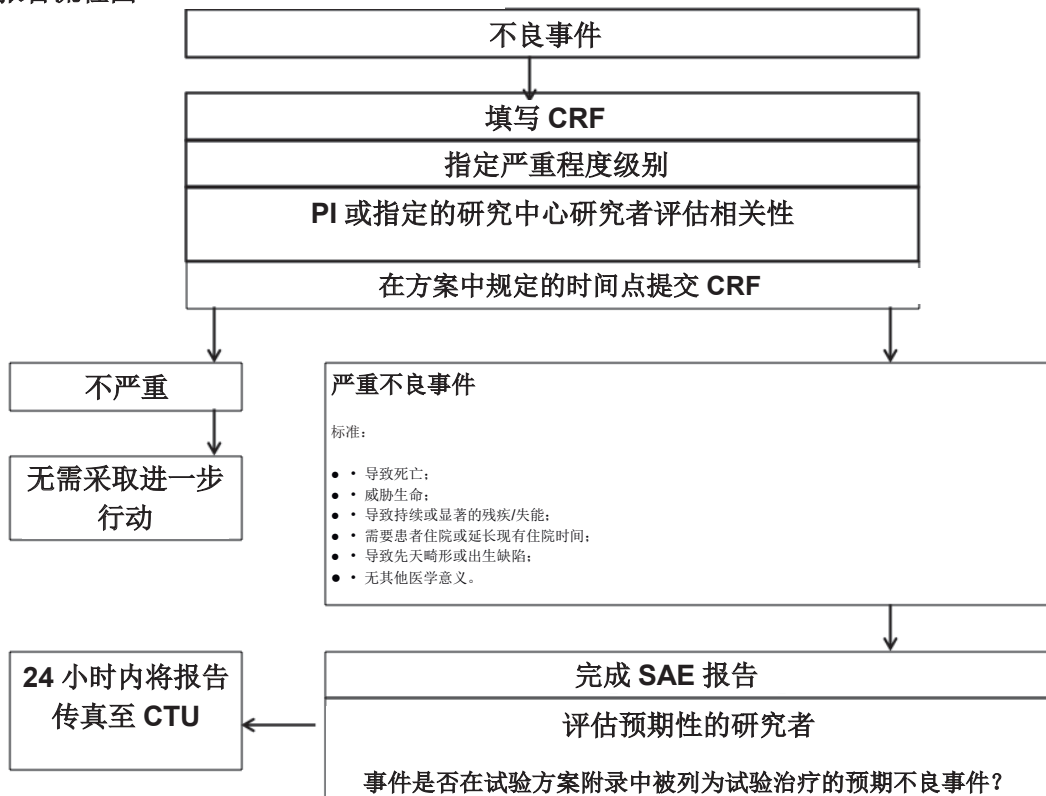

#### 8.4.3 疑似非预期严重不良反应 (SUSAR)

非预期 AE 是任何特异性或严重程度与研究手册或说明书不一致的不良事件。此外，增加关于已知经证实的 AE 特异性或严重程度重要信息的报告构成了非预期 AE。例如，比研究手册中所述更为特异或严重的事件被认为是“非预期”事件。根据适用法规，如果出现疑似、非预期、严重不良反应 (SUSAR)，SUSAR 与设盲治疗有关，则通常在向卫生机构、伦理委员会和研究者报告之前，揭盲患者的治疗编码。

协调中心的工作人员将负责跟踪所有 SUSAR，以确保所有细节都详细记录。协调中心还负责提醒参与中心 SUSAR 报告，并在规定的时间范围内向监管机构报告。每个主要研究者都有责任根据当地要求，向当地伦理委员会定期汇总所有发生的 SAE 和 SUSAR 事件。当地 IRB 的有关决议的副本也应发送到协调中心。

非预期严重不良反应个例安全性报告内容应按照 ICH 《E2B (R3)：临床安全数据的管理：个例安全性报告传输的数据要素》相关要求报告。相关术语应采用 ICH《M1：监管活动医学词典 (MedDRA)》进行编码。

研究者获知严重不良事件后，应立即对严重不良事件进行全面分析、评估和判断。根据严重不良事件的性质（类别）按以下时限向组长单位快速报告：



（一）对于致死或危及生命的非预期严重不良反应，研究者应在首次获知后尽快报告，但不得超过 7 天，并在随后的 8 天内报告、完善随访信息。

注：研究者首次获知当天为第 0 天。

（二）对于非致死或危及生命的非预期严重不良反应，研究者应在首次获知后尽快报告，但不得超过 15 天。

快速报告开始时间为该中心临床研究开始日期，结束时间为国内最后一例受试者随访结束日期。临床试验结束或随访结束后至获得审评审批结论前发生的严重不良事件，由研究者报告申请人，若属于非预期严重不良反应，也应进行快速报告。

研究者在首次报告后，应继续跟踪严重不良反应，以随访报告的形式及时报送有关新信息或对前次报告的更改信息等，报告时限为获得新信息起 15 天内。

## 8.5 研究终止规则

武汉市金银潭医院和其他参与单位或国家药品监督管理局（NMPA）可以随时终止本研究。终止研究的原因可能包括但不限于下列：

- 本研究或其他研究中的 AE 的发生率或严重程度表明对患者有潜在的危害
- 患者入组不理想

## 8.6 安全性监查

本研究由项目组和 GCP 中心监督不良事件，并对 SAE 评估及处理。

## 9 统计学考量

### 9.1 概述

由于本研究是应对突发公共卫生事件紧急开展的临床试验，对于研究干预无充足的信息以指导验证性试验的设计。因此研究的统计学推断仅对临床决策具有参考性价值。

详细的统计分析计划将在研究数据锁定前制定。

### 9.2 样本量

由于本次研究是应对突发公共卫生事件，对该疾病的致病能力尚无清晰的认识，患者的临床转归和疾病改善均不明确。且该治疗方案用于 SARS 的数据是来源于历史对照研究，无法评估其有效性。因此，项目组决定初步将样本量设定为 160 例，标准治疗组为 80 例，干预组为 80 例。完成初步入组后，计算统计把握度，若提示干预有效且统计把握度不足以证实有效性，将评估考虑进一步扩大样本量。若统计把握度足以说明有效性或无效，将停止本阶段研究。

### 9.3 随机化

本研究采用电话/微信随机，为保障分配隐藏，负责随机的人员不得参与患者疾病治疗和预后评估等。

随机过程将使得治疗组和空白对照组的患者比例约为 1:1，按照氧疗支持水平（是否需要经鼻高流量或更高程度支持）进行分层。具体随机过程为：在确认受试者提供知情同意后，并符合所有入选标准且不符合任意一条排除标准，对受试者进行随机，获得受试者的随机号及药物分配情况。

### 9.4 分析人群

ITT 分析集：所有完成随机化的受试者。

m-ITT1（全分析集 FAS）：在 ITT 原则的基础上，尽可能纳入所有随机化的受试者。仅剔除以下已随机的受试者：受试者未接受试验用药物的治疗；随机化后无任何观测数据。

m-ITT2: 在 m-ITT1 基础上, 剔除在随机化后 24 小时内死亡的受试者。

符合方案集 PPS: FAS 人群的基础上, 剔除具有可能会影响疗效评价的方案违背的受试者。

安全性分析数据集 SS: 包括至少接受 1 次研究药物治疗的所有患者。

ITT 人群将作为本研究的主要有效性分析人群。

## 9.5 统计分析方法

### 9.5.1 一般原则

定量指标的描述将计算其均数、标准差、中位数、最小值、最大值。分类指标描述各类的例数及百分数。定量指标的组间比较采用根据数据分布情况成组 t 检验或 Wilcoxon 秩和检验 (若 t 检验不适用), 分类指标采用卡方检验或精确概率法 (若卡方检验不适用), 等级资料采用 Wilcoxon 秩和检验或 CMH 检验, 同时采用等级 logistic 回归计算等级 OR 值。所有的统计检验如不特殊说明均采用双侧检验, P 值小于 0.05 (双侧) 将被认为所检验的差别有统计意义。

### 9.5.2 主要终点分析策略

研究主要终点为时间-事件终点, 采用生存分析方法比较两组患者达到临床改善的时间。将描述两组的中位改善时间、28 天累计改善率, 两组比较方法采用 log-rank 检验, 并通过 Cox 比例风险模型计算临床改善的风险比 (Hazard Ratio, HR) 及其 95% 置信区间。

### 9.5.3 缺失值的处理

对于患者状态评价的缺失, 将采用患者最后一次评估的结果作为最终分析的结果。患者在临床改善前发生死亡将处理为最差结果, 即 28 天后删失。

### 9.5.4 亚组分析

将按照随机化时考虑的分层因素: 氧疗支持水平 (是否需要经鼻高流量或更高程度支持) 进行主要终点的亚组分析。

### 9.5.5 敏感性分析

本研究主要疗效终点分析人群为 ITT 人群，并采用 ITT 分析策略。其他分析人群及分析策略将作为敏感性分析。

本研究主要终点截至随机后 28 天，主要终点的分析将对所有超过 28 天的数据做删失处理。考虑到受试者 28 天后仍有疗效评价（包括未出院患者和出院患者的电话随访），将纳入 28 天后的数据作为敏感性分析结果。

## 10 源文件与源数据 / 文件的访问

这项研究的数据收集工具将使用经过验证的电子系统，数据录入到经过验证的数据库或数据系统。记录在纸质 CRF 以及来自其他研究来源的数据管理将按照标准进行。国际公认的和公认的词表将用于数据编码

## 11 质量保证和质量控制

本研究将严格按照各个研究中心的规章制度和 GCP 的指南进行。

### 11.1. 研究者材料

每个参研中心将保留 GCP 指南规定的基本的文件。

### 11.2. 研究材料

将提供一份纸质版完整详细的数据收集指南，包括定义和具体内容。为保障 CRF 和 EDC 系统的正确使用，还将提供随机和 EDC 系统的使用指南。所有这些文件也可以 PDF 格式电子版形式提供，以便根据需要进行打印。以上材料是为了保证研究协调员进行高质量的数据收集和数据输入。

### 11.3. 启动

在分中心研究启动前，将进行初始访视以确保所有相关的基本文件和试验用品都已到位，并且确保参与研究的人员完全了解研究方案和 SOP。所有研究人员都将接受培训，解释研究方案和流程，本次应急状态下将使用纸质版 CRF，并录入数据库。研究中心的“启动访视”将通过电话会议或视频会议进行。将为研究人员提供书面和电子材料。

## 11.4. 研究期间的监察

研究者和医疗机构负责人（如适用）同意允许监察员直接访问所有相关文件。项目组和武汉市金银潭医院 GCP 中心人员将负责试验监察。将根据研究计划进行现场监察访视。监察人员在招募阶段将多次访问每个研究中心。

在研究期间的现场监察访视中，研究监察员将确认受试者知情同意，检查数据记录的完整性，数据质量，方案、SOP 和 GCP 遵守，以及患者招募，研究药物储存和后续随访的完成情况。

监察以确保：

- 充分获得受试者的知情同意
- 受试者的安全和权利受到保护。
- 研究是根据方案，GCP 指南和适用的法规要求进行的。
- 数据真实，准确，完整。
- 此外，在研究期间或之后的任何时间都有可能进行稽查。

此外，协调中心成员将通过经过验证的和一致的规则以及定期数据清理对基于网络的数据库定期进行本地或远程监控，以确保研究数据的完整性

## 11.5. 研究中心关闭

在研究完成后，监察人员将确保制计划，规定各个研究中心长期储存相关数据和源文件（为期 5 年）。研究药物将根据当地标准程序进行核对并销毁。

# 12 伦理 / 人类受试者保护

## 12.1 伦理学标准

研究将严格按照在《赫尔辛基宣言》中有关的伦理原则进行。研究方案将由中国各中心的研究伦理委员会（Ethics Committee）审核并批准。

## 12.2 机构审查委员会

本项目的方案将由每家参加研究中心的 IEC/IRB 进行审查。在进行多中心试验的单一伦理审查的司法辖区内，1 名主要研究者（称为协调研究者）将负责代表该委员会中的研究者向 IEC/IRB 申请。每位主要研究者将负责在各个参与研究中心申请当地研究监管部门的批准。研究开始前，研究方案和知情同意文件的批准文件将在任何研究中心开始前提供给协调中心。协调中心将以编制标准申请表和模板知情同意书的形式协助这一流程。如必要，将调整标准信息声明和知情同意书的内容和格

式，以符合当地 IEC/IRB 指南和要求。试验期间，主要研究者将通知 IEC/IRB 对研究方案或知情同意文件的任何修订或修改，仅在收到 IEC/IRB 批准后方可实施，除非为消除对患者的直接危害而需要变更，在这种情况下，应尽快通知 IEC/IRB。主要研究者还将负责根据指南向 IEC/IRB 提交进度报告、不良事件报告和任何其他必要文件。所有 IEC/IRB 和研究管理专员的通信副本将连同批准的知情同意书副本一起提供给协调中心。相同文件的副本也将保存在研究的研究者文件中。

## 12.3 知情同意程序

### 12.3.1 提供给受试者的知情 / 同意和其他须知文件

知情同意书是向人们提供信息，帮助决定是否作为受试者参加研究的过程。它是人类研究受试者和研究人员之间关于研究的基本信息的即时交谈，在获得知情同意前开始，一直持续至受试者参加研究。研究基本信息讨论将包括研究目的、持续时间、实验程序、替代方法、风险和获益，受试者有机会提出问题并得到解答。受试者在接受任何研究特定程序前应签署知情同意文件。受试者在整个试验过程中可随时撤回知情同意。将向受试者提供一份知情同意文件的复本供其保存。研究者将在受试者的病历中记录知情同意书的签署。向受试者强调如果其拒绝参加本研究，医疗护理的质量不会受到不良影响，从而保护受试者的权利和健康。

本研究将在 ICU 和普通病房进行。除出院后的患者状态随访和生活质量问卷的实施外，所有研究相关评估均属于重症冠状病毒患者标准护理的一部分。在入组本研究前，各研究中心的主要研究者或其指定代表，将从任何清醒且理解能力正常的患者中获得书面知情同意书。在临床试验招募前，通常无法直接从 ICU 获得患者的书面和知情同意，因为这些患者通常无意识、接受镇静、插管和重病无法理解与临床试验参与相关的信息。在这些情况下，本研究中获得知情同意的的方法将基于直系亲属或授权的亲属。

### 12.3.2 知情同意程序和记录

患者和研究者或指定人员将在表格上签名并注明日期。签署的知情同意书将保留在研究者研究中心文件中，或者在医疗机构的患者记录 / 文件中（如果当地要求）。如果在进行研究特定程序的日期获得知情同意，则研究记录或患者的临床记录必须清楚地显示在这些程序前获得了知情同意。当获得可能与知情同意相关的重要新信息时，或方案修订需要变更书面知情同意书的内容，将对患者提

供的知情同意书和任何其他书面信息进行修订。研究者将及时通知患者，并要求患者签署修订后的知情同意书确认参加研究。修订后的知情同意书必须在实施前获得 IEC/IRB 的批准。

## 12.4 受试者和数据保密

所有记录将在中国法律规定的范围内保密。研究监查员和其他授权代理人可检查研究者保管的所有文件和记录，包括但不限于病历。记录将保持锁定，所有计算机输入和网络程序仅使用编码编号完成。未经受试者书面许可，不得发布临床信息，IRB、NMPA 或申办者的指定人员进行监查的必要情况除外。

### 12.4.1 研究使用的存储人体样本、标本或数据

本方案下采集的样本和数据将用于确定洛匹那韦/利托那韦疗效安全性、病毒学检查和干预治疗的抗病毒效应。储存、未链接或未经确认的样本的研究使用，可豁免需要进行前瞻性 IRB 审查和批准。豁免申请将以书面形式向中日友好医院提交，经授权决定是否豁免研究活动。

## 13 数据处理与记录保存

### 13.1 数据采集和管理责任

将由各研究中心接受过培训的工作人员采集所有数据。然后将数据填写在设计好的病例报告表（CRF）中，定期由项目组成员录入电子数据库中，并与经验证数据系统中的其他来源提供的数据合并。研究者负责确保录入采集数据的完整、准确与及时记录。然后由项目组对病历中的数据进行审查。按照适用的标准和数据清理程序进行临床数据管理，以确保数据的完整性（例如，在数据中删除错误和不一致）。将使用 MedDRA 21.0 版本和内部经验证的药物词典对不良事件和合并用药术语进行编码。将参考该地区所有获批药物的适用医学词典。电子病例报告表（包括质询和稽查跟踪）将由中日友好医院保存，副本将发送给研究者保存为研究者副本。

### 13.2 研究记录保存

研究结束后，研究者或医疗机构负责人（如适用）必须在安全的地点保存所有研究中心的研究记录（当地法规要求的除外）。如需要，必须易于访问记录，并且必须与机构、支持系统和相关研究中心工作人员的评估联合使用。在当地法律 / 法规或机构政策允许的情况下，某些或所有的记录可能以硬拷贝（例如，缩微胶片、扫描文件、电子）的格式保存；但是，在采取此类措施之前务必谨慎。



研究者必须确保所有复制文件均清晰可辨，并且是原件的真实准确副本。此外，如需要，必须满足可访问和检索标准，包括硬拷贝副本的重建。研究者还必须确保复制文件有可用的备份，并有可接受的质量控制程序，用于创建复制文件。中日友好医院/武汉市金银潭医院应通知研究者保存临床试验机构记录的时间期限，以符合所有适用的监管要求。根据当地法律 / 法规和 / 或机构要求，最短保留时间将符合适用于特定研究中心的最严格标准。研究者必须将档案安排中的任何变更通知武汉市金银潭医院，包括但不限于研究中心外设施的记录存档或研究者不再与研究中心相关的事件的所有权转让。

### 13.3 方案偏离

将按照偏离类型总结方案偏离的数量（不合格患者随机化、不依从研究治疗和其他）。将列出所有方案偏离以及偏离描述和采取的纠正措施。

### 13.4 发表和数据共享政策

本研究将以 CAP-China 研究者的名义开展。中心项目协调和数据管理将由北京中日友好医院提供。本研究的主要出版物将采用 CAP-China 研究者的姓名，并向所有协调研究者、研究协调员和机构分配完整的信用凭证。如果发表时需要个体姓名，则署名监督委员会和执行委员会成员的姓名，主要研究者的姓名排在末位（通讯、共同通讯作者），随后按照各个中心入组病例数排序和研究实际贡献，设置若干名共同一作。

## 14 利益冲突政策

研究受试者可以审查方案，评估利益冲突。

## 15 参考文献

- 1 Ksiazek TG, Erdman D, Goldsmith CS, *et al.* A Novel Coronavirus Associated with Severe Acute Respiratory Syndrome. *N Engl J Med* 2003; **348**: 1953–66.
- 2 Drosten C, Günther S, Preiser W, *et al.* Identification of a Novel Coronavirus in Patients with Severe Acute Respiratory Syndrome. *N Engl J Med* 2003; **348**: 1967–76.
- 3 Fehr AR, Channappanavar R, Perlman S. Middle East Respiratory Syndrome: Emergence of a Pathogenic Human Coronavirus. *Annu Rev Med* 2017; **68**: 387–99.
- 4 Falzarano D, de Wit E, Rasmussen AL, *et al.* Treatment with interferon- $\alpha$ 2b and ribavirin improves



- outcome in MERS-CoV-infected rhesus macaques. *Nat Med* 2013; **19**: 1313–7.
- 5 Kim UJ, Won E-J, Kee S-J, Jung S-I, Jang H-C. Combination therapy with lopinavir/ritonavir, ribavirin and interferon-alpha for Middle East respiratory syndrome: a case report. *Antivir Ther* 2015; **21**: 455–9.
  - 6 Chan JFW, Chan K-H, Kao RYT, *et al.* Broad-spectrum antivirals for the emerging Middle East respiratory syndrome coronavirus. *J Infect* 2013; **67**: 606–16.
  - 7 Shalhoub S, Farahat F, Al-Jiffri A, *et al.* IFN- $\alpha$ 2a or IFN- $\beta$ 1a in combination with ribavirin to treat Middle East respiratory syndrome coronavirus pneumonia: a retrospective study. *J Antimicrob Chemother* 2015; **70**: 2129–32.
  - 8 Al-Tawfiq JA, Momattin H, Dib J, Memish ZA. Ribavirin and interferon therapy in patients infected with the Middle East respiratory syndrome coronavirus: an observational study. *Int J Infect Dis IJID Off Publ Int Soc Infect Dis* 2014; **20**: 42–6.
  - 9 Huang X, Xu Y, Yang Q, *et al.* Efficacy and biological safety of lopinavir/ritonavir based anti-retroviral therapy in HIV-1-infected patients: a meta-analysis of randomized controlled trials. *Sci Rep* 2015; **5**: 8528.
  - 10 Chu CM. Role of lopinavir/ritonavir in the treatment of SARS: initial virological and clinical findings. *Thorax* 2004; **59**: 252–6.
  - 11 Spanakis N, Tsiodras S, Haagmans BL, *et al.* Virological and serological analysis of a recent Middle East respiratory syndrome coronavirus infection case on a triple combination antiviral regimen. *Int J Antimicrob Agents* 2014; **44**: 528–32.
  - 12 Min C-K, Cheon S, Ha N-Y, *et al.* Comparative and kinetic analysis of viral shedding and immunological responses in MERS patients representing a broad spectrum of disease severity. *Sci Rep* 2016; **6**: 25359.
  - 13 WHO | Clinical management of severe acute respiratory infection when Middle East respiratory syndrome coronavirus (MERS-CoV) infection is suspected. WHO. [http://www.who.int/csr/disease/coronavirus\\_infections/case-management-ipc/en/](http://www.who.int/csr/disease/coronavirus_infections/case-management-ipc/en/) (accessed Jan 9, 2020).
  14. Philip R. Wyde, Samuel Z. Wilson, Michael J. Kramer, *et al.* Pulmonary Deposition and Clearance of Aerosolized Interferon[J]. *Antimicrobial Agents and Chemotherapy*, 1984,25(6):729-734.

### 关键修改记录摘要

| 修改日期            | 伦理修正审查日期        | 版本号 | 章节   | 修改主要内容                                                                                                                                                                            |
|-----------------|-----------------|-----|------|-----------------------------------------------------------------------------------------------------------------------------------------------------------------------------------|
| 2020年01月<br>13日 | 2020年01月<br>28日 | 2.0 | 标题   | 删除：空白对照和干扰素- $\alpha$ 2b（空白对照描述不恰当，且需要加上标准治疗）<br><br>修改为：一项评价洛匹那韦/利托那韦联合标准治疗在 2019 新型冠状病毒感染住院患者中的疗效和安全性随机、开放、对照的研究                                                                |
| 2020年01月<br>13日 | 2020年01月<br>28日 | 2.0 | 入选标准 | 删除：发病到入院时间 $\leq$ 10 天（因早期无 PCR 试剂盒，需要送检至指定检测机构后转诊至金银潭医院，因此较多患者发病到入院时间超过 10 天）<br><br>删除：在尚未开发出快速诊断试剂盒情况下，经过临床诊断的不明原因病毒性肺炎患者。（原因：研究正式开始时已经有 PCR 检测试剂，转诊至定点医院患者均为 PCR 确诊的冠状病毒感染患者） |
| 2020年01月<br>13日 | 2020年01月<br>28日 | 2.0 | 研究管理 | 修改试验指导委员会成员：[REDACTED]<br>[REDACTED]（因感染 2019-nCoV 住院隔离治疗无法指导本项研究）                                                                                                                |
| 2020年01月<br>13日 | 2020年01月<br>28日 | 2.0 | 干预措施 | 删除：吸入 IFN- $\alpha$ 2b 联合治疗的内容（因为项目组担心干扰素引起的不良反应）                                                                                                                                 |
| 2020年01月<br>13日 | 2020年01月<br>28日 | 2.0 | 时间表格 | 呼吸道、血液和肛拭子标本采样点修改为：约 5 天 1 次，与临床诊疗常规采样时间相符合                                                                                                                                       |
| 2020年01月<br>13日 | 2020年01月<br>28日 | 2.0 | 其他   | 新型冠状病毒肺炎属于新发突发传染病，疾病名称、标准治疗等部分表述作相应修改                                                                                                                                             |

A randomized, open-label trial to evaluate the efficacy and safety of lopinavir-ritonavir in combination with standard-of-care in hospitalized patients with 2019-nCoV infection:

## **Statistical Analysis Plan**

**vision 1.0 2020.02.12**

### **Contents**

**Table 1:** Baseline characteristics – ITT population.

**Table 2:** Outcomes in the intention-to-treat population.

**Table 3:** Outcomes in the modified intention-to-treat population.

**Table 4:** Classification of Adverse Events using the NIH Common Terminology Criteria for Adverse Events (CTCAE), Version 4.0.

**Table 5:** Summary of Adverse Events by severity.

A randomized, open-label trial to evaluate the efficacy and safety of lopinavir-ritonavir in combination with standard-of-care in hospitalized patients with 2019-nCoV infection:

## **Statistical Analysis Plan**

**vision 1.0 2020.02.12**

### **Contents**

**Table 1:** Baseline characteristics – ITT population.

**Table 2:** Outcomes in the intention-to-treat population.

**Table 3:** Outcomes in the modified intention-to-treat population.

**Table 4:** Classification of Adverse Events using the NIH Common Terminology Criteria for Adverse Events (CTCAE), Version 4.0.

**Table 5:** Summary of Adverse Events by severity.

**Table 6:** Summary of Protocol Violations.

## Collaborators

| Center                 | Names |
|------------------------|-------|
| China-Japan Friendship |       |
| Jin Yin Tan Hospital   |       |

**Table 1:** Baseline characteristics – ITT population.

| Characteristics                                             | Intervention<br>(N=XX) | Group SOC<br>(N=XX) | Group |
|-------------------------------------------------------------|------------------------|---------------------|-------|
| Age, yr                                                     | xx (xx, xx)            | xx (xx, xx)         |       |
| Sex, male, n (%)                                            | xx (xx.x)              | xx (xx.x)           |       |
| Co-morbidities                                              | xx (xx, xx)            | xx (xx, xx)         |       |
| Diabetes, n (%)                                             | xx (xx.x)              | xx (xx.x)           |       |
| Cerebrovascular disease, n (%)                              | xx (xx.x)              | xx (xx.x)           |       |
| Malignancies, n (%)                                         | xx (xx.x)              | xx (xx.x)           |       |
| Body temperature, °C                                        | xx (xx.x)              | xx (xx.x)           |       |
| Fever                                                       | xx (xx.x)              | xx (xx.x)           |       |
| Respiratory rate > 24 /min, n (%)                           | xx (xx.x)              | xx (xx.x)           |       |
| Systolic blood pressure < 90 mmHg, n (%)                    | xx (xx.x)              | xx (xx.x)           |       |
| White blood cell count (× 10 <sup>9</sup> /L)               | xx (xx, xx)            | xx (xx, xx)         |       |
| 4-10, n (%)                                                 | xx (xx.x)              | xx (xx.x)           |       |
| <4, n (%)                                                   | xx (xx.x)              | xx (xx.x)           |       |
| >10, n (%)                                                  | xx (xx.x)              | xx (xx.x)           |       |
| Lymphocyte count (× 10 <sup>9</sup> /L)                     | xx (xx, xx)            | xx (xx, xx)         |       |
| ≥ 1.0, n (%)                                                | xx (xx.x)              | xx (xx.x)           |       |
| < 1.0, n (%)                                                | xx (xx.x)              | xx (xx.x)           |       |
| Platelet count (× 10 <sup>9</sup> /L)                       | xx (xx, xx)            | xx (xx, xx)         |       |
| ≥ 100, n (%)                                                | xx (xx.x)              | xx (xx.x)           |       |
| < 100, n (%)                                                | xx (xx.x)              | xx (xx.x)           |       |
| Serum creatinine (μmol/L)                                   | xx (xx, xx)            | xx (xx, xx)         |       |
| ≤ 133, n (%)                                                | xx (xx.x)              | xx (xx.x)           |       |
| > 133, n (%)                                                | xx (xx.x)              | xx (xx.x)           |       |
| Aspartate aminotransferase (U/L)                            | xx (xx, xx)            | xx (xx, xx)         |       |
| ≤ 40, n (%)                                                 | xx (xx.x)              | xx (xx.x)           |       |
| > 40, n (%)                                                 | xx (xx.x)              | xx (xx.x)           |       |
| Alanine aminotransferase (U/L)                              | xx (xx, xx)            | xx (xx, xx)         |       |
| ≤ 50                                                        | xx (xx.x)              | xx (xx.x)           |       |
| > 50                                                        | xx (xx.x)              | xx (xx.x)           |       |
| Lactate dehydrogenase (U/L)                                 | xx (xx, xx)            | xx (xx, xx)         |       |
| ≤ 245                                                       | xx (xx.x)              | xx (xx.x)           |       |
| > 245                                                       | xx (xx.x)              | xx (xx.x)           |       |
| Creatine kinase (U/L)                                       | xx (xx, xx)            | xx (xx, xx)         |       |
| ≤ 185                                                       | xx (xx.x)              | xx (xx.x)           |       |
| > 185                                                       | xx (xx.x)              | xx (xx.x)           |       |
| NEWS2 score at day 1                                        | xx (xx, xx)            | xx (xx, xx)         |       |
| Seven-category scale at day 1                               | xx (xx, xx)            | xx (xx, xx)         |       |
| 3 Hospitalization, not requiring supplemental oxygen, n (%) | xx (xx, xx)            | xx (xx, xx)         |       |
| 4 Hospitalization, requiring supplemental oxygen, n (%)     | xx (xx.x)              | xx (xx.x)           |       |
| 5 Hospitalization, requiring HFNC and/or non-IMV, n (%)     | xx (xx.x)              | xx (xx.x)           |       |
| 6 Hospitalization, requiring ECMO and/or IMV, n (%)         | xx (xx.x)              | xx (xx.x)           |       |
| Days from illness onset to randomization (days)             | xx (xx, xx)            | xx (xx, xx)         |       |
| Early (≤12 days of symptom onset), n (%)                    | xx (xx.x)              | xx (xx.x)           |       |
| Late (> 12 days of symptom onset), n (%)                    | xx (xx.x)              | xx (xx.x)           |       |
| Mean viral load (SD), log <sub>10</sub> copies/mL at day 1  | xx ± xx                | xx ± xx             |       |
| Vasopressors, n (%)                                         | xx (xx.x)              | xx (xx.x)           |       |
| Renal replacement therapy, n (%)                            | xx (xx.x)              | xx (xx.x)           |       |
| Non-invasive mechanical ventilation, n (%)                  | xx (xx.x)              | xx (xx.x)           |       |
| Invasive mechanical ventilation, n (%)                      | xx (xx.x)              | xx (xx.x)           |       |
| ECMO, n (%)                                                 | xx (xx.x)              | xx (xx.x)           |       |
| Antibiotic, n (%)                                           | xx (xx.x)              | xx (xx.x)           |       |
| Corticosteroids therapy, n (%)                              | xx (xx.x)              | xx (xx.x)           |       |
| Days from illness onset to corticosteroids therapy (days)   | xx (xx, xx)            | xx (xx, xx)         |       |
| Days of corticosteroids therapy (days)                      | xx (xx, xx)            | xx (xx, xx)         |       |

Note. Numbers in parenthesis correspond to interquartile range observed value for continuous variables and to percentages for indicator variables as appropriate. Abbreviation: NEWS2 = National Early Warning Score 2; HFNC = high-flow nasal cannula for oxygen therapy; IMV = invasive mechanical ventilation; ECMO = extracorporeal membrane oxygenation; SD = standard deviation.

**Table 2:** Outcomes in the intention-to-treat population.

| Variable                                                          | Intervention Group<br>(N=XX) | Control<br>(N=XX) | Difference <sup>§</sup>  |
|-------------------------------------------------------------------|------------------------------|-------------------|--------------------------|
| TTCI                                                              | xx (xx, xx)                  | xx (xx, xx)       | xx (xx, xx) <sup>†</sup> |
| Day 28 mortality, n (%)                                           | xx (xx.x)                    | xx (xx.x)         | xx (xx, xx)              |
| Early (≤12 days of symptom onset)                                 | xx (xx.x)                    | xx (xx.x)         | xx (xx, xx)              |
| Late (> 12 days of symptom onset)                                 | xx (xx.x)                    | xx (xx.x)         | xx (xx, xx)              |
| Clinical improvement rates                                        |                              |                   | xx (xx, xx)              |
| Day 7, n (%)                                                      | xx (xx.x)                    | xx (xx.x)         | xx (xx, xx)              |
| Day 14, n (%)                                                     | xx (xx.x)                    | xx (xx.x)         | xx (xx, xx)              |
| Day 28, n (%)                                                     | xx (xx.x)                    | xx (xx.x)         | xx (xx, xx)              |
| ICU length of stay (days)                                         | xx (xx, xx)                  | xx (xx, xx)       | xx (xx, xx)              |
| ICU length of stay of survivors (days)                            | xx (xx, xx)                  | xx (xx, xx)       | xx (xx, xx)              |
| ICU length of stay of non-survivors (days)                        | xx (xx, xx)                  | xx (xx, xx)       | xx (xx, xx)              |
| IMV duration (days)                                               | xx (xx, xx)                  | xx (xx, xx)       | xx (xx, xx)              |
| Length of oxygen support (days)                                   | xx (xx, xx)                  | xx (xx, xx)       | xx (xx, xx)              |
| Hospital length of stay (days)                                    | xx (xx, xx)                  | xx (xx, xx)       | xx (xx, xx)              |
| Days from randomization to discharge (days)                       | xx (xx, xx)                  | xx (xx, xx)       | xx (xx, xx)              |
| Days from randomization to death (days)                           | xx (xx, xx)                  | xx (xx, xx)       | xx (xx, xx)              |
| Seven-category scale at day 7                                     |                              |                   |                          |
| 1 Not hospitalized, and resume normal activities, n (%)           | xx (xx.x)                    | xx (xx.x)         |                          |
| 2 Not hospitalized, but unable to resume normal activities, n (%) | xx (xx.x)                    | xx (xx.x)         |                          |
| 3 Hospitalization, not requiring supplemental oxygen, n (%)       | xx (xx.x)                    | xx (xx.x)         |                          |
| 4 Hospitalization, requiring supplemental oxygen, n (%)           | xx (xx.x)                    | xx (xx.x)         |                          |
| 5 Hospitalization, requiring HFNC and/or non-IMV, n (%)           | xx (xx.x)                    | xx (xx.x)         |                          |
| 6 Hospitalization, requiring ECMO and/or IMV, n (%)               | xx (xx.x)                    | xx (xx.x)         |                          |
| 7 Death, n (%)                                                    | xx (xx.x)                    | xx (xx.x)         |                          |
| Seven-category scale at day 14                                    |                              |                   |                          |
| 1 Not hospitalized, and resume normal activities, n (%)           | xx (xx.x)                    | xx (xx.x)         |                          |
| 2 Not hospitalized, but unable to resume normal activities, n (%) | xx (xx.x)                    | xx (xx.x)         |                          |
| 3 Hospitalization, not requiring supplemental oxygen, n (%)       | xx (xx.x)                    | xx (xx.x)         |                          |
| 4 Hospitalization, requiring supplemental oxygen, n (%)           | xx (xx.x)                    | xx (xx.x)         |                          |
| 5 Hospitalization, requiring HFNC and/or non-IMV, n (%)           | xx (xx.x)                    | xx (xx.x)         |                          |
| 6 Hospitalization, requiring ECMO and/or IMV, n (%)               | xx (xx.x)                    | xx (xx.x)         |                          |
| 7 Death, n (%)                                                    | xx (xx.x)                    | xx (xx.x)         |                          |

Note. Number (percentage) or median (interquartile range) is summarized as appropriate. Abbreviation: ICU = intensive care unit; HFNC = high-flow nasal oxygen therapy; IMV = intensive mechanical ventilation; ECMO = extracorporeal membrane oxygenation; TTCI = time to clinical improvement. Clinical improvement (the event) was defined as a decline of two categories on the modified seven-category ordinal scale of clinical status, or hospital discharge.

§ Differences were expressed as rate differences or Hodges-Lehmann estimator and 95% confidence intervals.

† The hazard ratio was estimated by COX proportional risk model.

**Table 3:** Outcomes in the modified intention-to-treat population.

| Variable                                                          | Intervention Group<br>(N=XX) | Control<br>(N=XX) | Difference <sup>§</sup>  |
|-------------------------------------------------------------------|------------------------------|-------------------|--------------------------|
| TTCI                                                              | xx (xx, xx)                  | xx (xx, xx)       | xx (xx, xx) <sup>†</sup> |
| Day 28 mortality, n (%)                                           | xx (xx.x)                    | xx (xx.x)         | xx (xx, xx)              |
| Early (≤12 days of symptom onset)                                 | xx (xx.x)                    | xx (xx.x)         | xx (xx, xx)              |
| Late (> 12 days of symptom onset)                                 | xx (xx.x)                    | xx (xx.x)         | xx (xx, xx)              |
| Clinical improvement rates                                        |                              |                   | xx (xx, xx)              |
| Day 7, n (%)                                                      | xx (xx.x)                    | xx (xx.x)         | xx (xx, xx)              |
| Day 14, n (%)                                                     | xx (xx.x)                    | xx (xx.x)         | xx (xx, xx)              |
| Day 28, n (%)                                                     | xx (xx.x)                    | xx (xx.x)         | xx (xx, xx)              |
| ICU length of stay (days)                                         | xx (xx, xx)                  | xx (xx, xx)       | xx (xx, xx)              |
| ICU length of stay of survivors (days)                            | xx (xx, xx)                  | xx (xx, xx)       | xx (xx, xx)              |
| ICU length of stay of non-survivors (days)                        | xx (xx, xx)                  | xx (xx, xx)       | xx (xx, xx)              |
| IMV duration (days)                                               | xx (xx, xx)                  | xx (xx, xx)       | xx (xx, xx)              |
| Length of oxygen support (days)                                   | xx (xx, xx)                  | xx (xx, xx)       | xx (xx, xx)              |
| Hospital length of stay (days)                                    | xx (xx, xx)                  | xx (xx, xx)       | xx (xx, xx)              |
| Days from randomization to discharge (days)                       | xx (xx, xx)                  | xx (xx, xx)       | xx (xx, xx)              |
| Days from randomization to death (days)                           | xx (xx, xx)                  | xx (xx, xx)       | xx (xx, xx)              |
| Seven-category scale at day 7                                     |                              |                   |                          |
| 1 Not hospitalized, and resume normal activities, n (%)           | xx (xx.x)                    | xx (xx.x)         |                          |
| 2 Not hospitalized, but unable to resume normal activities, n (%) | xx (xx.x)                    | xx (xx.x)         |                          |
| 3 Hospitalization, not requiring supplemental oxygen, n (%)       | xx (xx.x)                    | xx (xx.x)         |                          |
| 4 Hospitalization, requiring supplemental oxygen, n (%)           | xx (xx.x)                    | xx (xx.x)         |                          |
| 5 Hospitalization, requiring HFNC and/or non-IMV, n (%)           | xx (xx.x)                    | xx (xx.x)         |                          |
| 6 Hospitalization, requiring ECMO and/or IMV, n (%)               | xx (xx.x)                    | xx (xx.x)         |                          |
| 7 Death, n (%)                                                    | xx (xx.x)                    | xx (xx.x)         |                          |
| Seven-category scale at day 14                                    |                              |                   |                          |
| 1 Not hospitalized, and resume normal activities, n (%)           | xx (xx.x)                    | xx (xx.x)         |                          |
| 2 Not hospitalized, but unable to resume normal activities, n (%) | xx (xx.x)                    | xx (xx.x)         |                          |
| 3 Hospitalization, not requiring supplemental oxygen, n (%)       | xx (xx.x)                    | xx (xx.x)         |                          |
| 4 Hospitalization, requiring supplemental oxygen, n (%)           | xx (xx.x)                    | xx (xx.x)         |                          |
| 5 Hospitalization, requiring HFNC and/or non-IMV, n (%)           | xx (xx.x)                    | xx (xx.x)         |                          |
| 6 Hospitalization, requiring ECMO and/or IMV, n (%)               | xx (xx.x)                    | xx (xx.x)         |                          |
| 7 Death, n (%)                                                    | xx (xx.x)                    | xx (xx.x)         |                          |

Note. Number (percentage) or median (interquartile range) is summarized as appropriate. Abbreviation: ICU = intensive care unit; HFNC = high-flow nasal oxygen therapy; IMV = intensive mechanical ventilation; ECMO = extracorporeal membrane oxygenation; TTCI = time to clinical improvement. Clinical improvement (the event) was defined as a decline of two categories on the modified seven-category ordinal scale of clinical status, or hospital discharge.

§ Differences were expressed as rate differences or Hodges-Lehmann estimator and 95% confidence intervals.

† The hazard ratio was estimated by COX proportional risk model.



**Table 4:** Classification of Adverse Events using the NIH Common Terminology Criteria for Adverse Events (CTCAE), Version 4.0.

| Adverse Event     | Grade                                                                                               |                                                                                                                                                                                        |                                                                                                                                                                                                                                                                 |                                                              |       |
|-------------------|-----------------------------------------------------------------------------------------------------|----------------------------------------------------------------------------------------------------------------------------------------------------------------------------------------|-----------------------------------------------------------------------------------------------------------------------------------------------------------------------------------------------------------------------------------------------------------------|--------------------------------------------------------------|-------|
|                   | 1                                                                                                   | 2                                                                                                                                                                                      | 2                                                                                                                                                                                                                                                               | 4                                                            | 5     |
| Anemia            | Hemoglobin (Hgb) <LLN - 10.0 g/dL; <LLN - 6.2 mmol/L; <LLN - 100 g/L                                | Hgb <10.0 - 8.0 g/dL; <6.2 - 4.9 mmol/L; <100 - 80g/L                                                                                                                                  | Hgb <8.0 g/dL; <4.9 mmol/L; <80 g/L; transfusion indicated                                                                                                                                                                                                      | Life-threatening consequences; urgent intervention indicated | Death |
| Diarrhea          | Increase of <4 stools per day over baseline; mild increase in ostomy output compared to baseline    | Increase of 4 - 6 stools per day over baseline; moderate increase in ostomy output compared to baseline                                                                                | Increase of >=7 stools per day over baseline; incontinence; hospitalization indicated; severe increase in ostomy output compared to baseline; limiting self-care ADL                                                                                            | Life-threatening consequences; urgent intervention indicated | Death |
| Allergic reaction | Transient flushing or rash, drug fever <38 degrees C (<100.4 degrees F); intervention not indicated | Intervention or infusion interruption indicated; responds promptly to symptomatic treatment (e.g., antihistamines, NSAIDS, narcotics); prophylactic medications indicated for <=24 hrs | Prolonged (e.g., not rapidly responsive to symptomatic medication and/or brief interruption of infusion); recurrence of symptoms following initial improvement; hospitalization indicated for clinical sequelae (e.g., renal impairment, pulmonary infiltrates) | Life-threatening consequences; urgent intervention indicated | Death |

| Adverse Event                             | Grade                                                                                               |                                                                                                           |                                                                                                                                                                                |                                                              |       |
|-------------------------------------------|-----------------------------------------------------------------------------------------------------|-----------------------------------------------------------------------------------------------------------|--------------------------------------------------------------------------------------------------------------------------------------------------------------------------------|--------------------------------------------------------------|-------|
|                                           | 1                                                                                                   | 2                                                                                                         | 2                                                                                                                                                                              | 4                                                            | 5     |
| Local skin necrosis at the injection site | Asymptomatic or mild symptoms; clinical or diagnostic observations only; intervention not indicated | Moderate; minimal, local or noninvasive intervention indicated; limiting age appropriate instrumental ADL | Severe or medically significant but not immediately life-threatening; hospitalization or prolongation of existing hospitalization indicated; disabling; limiting self-care ADL | Life-threatening consequences; urgent intervention indicated | Death |
| Tongue Edema                              | Asymptomatic or mild symptoms; clinical or diagnostic observations only; intervention not indicated | Moderate; minimal, local or noninvasive intervention indicated; limiting age appropriate instrumental ADL | Severe or medically significant but not immediately life-threatening; hospitalization or prolongation of existing hospitalization indicated; disabling; limiting self-care ADL | Life-threatening consequences; urgent intervention indicated | Death |
| Dyspnea                                   | Shortness of breath with moderate exertion                                                          | Shortness of breath with minimal exertion; limiting instrumental ADL                                      | Shortness of breath at rest; limiting self care ADL                                                                                                                            | Life-threatening consequences; urgent intervention indicated | Death |
| Urticaria                                 | Urticarial lesions covering <10% BSA; topical                                                       | Urticarial lesions covering 10 - 30% BSA; oral intervention                                               | Urticarial lesions covering >30% BSA; IV                                                                                                                                       | -                                                            | -     |

| Adverse Event                                     | Grade                                 |                                         |                                                 |                                                                                                                                                         |   |
|---------------------------------------------------|---------------------------------------|-----------------------------------------|-------------------------------------------------|---------------------------------------------------------------------------------------------------------------------------------------------------------|---|
|                                                   | 1                                     | 2                                       | 2                                               | 4                                                                                                                                                       | 5 |
|                                                   | intervention indicated                | indicated                               | intervention indicated                          |                                                                                                                                                         |   |
| Alanine aminotransferase increased                | >ULN - 3.0 x ULN                      | >3.0 - 5.0 x ULN                        | >5.0 - 20.0 x ULN                               | >20.0 x ULN                                                                                                                                             | - |
| Aspartate aminotransferase increased              | >ULN - 3.0 x ULN                      | >3.0 - 5.0 x ULN                        | >5.0 - 20.0 x ULN                               | >20.0 x ULN                                                                                                                                             | - |
| Blood bilirubin increased                         | >ULN - 1.5 x ULN                      | >1.5 - 3.0 x ULN                        | >3.0 - 10.0 x ULN                               | >10.0 x ULN                                                                                                                                             | - |
|                                                   |                                       |                                         |                                                 |                                                                                                                                                         |   |
| CPK increased                                     | >ULN - 2.5 x ULN                      | >2.5 x ULN - 5 x ULN                    | >5 x ULN - 10 x ULN                             | >10 x ULN                                                                                                                                               | - |
| Creatinine increased                              | >1 - 1.5 x baseline; >ULN - 1.5 x ULN | >1.5 - 3.0 x baseline; >1.5 - 3.0 x ULN | >3.0 baseline; >3.0 - 6.0 x ULN                 | >6.0 x ULN                                                                                                                                              | - |
| Electrocardiogram QT corrected interval prolonged | QTc 450 - 480 ms                      | QTc 481 - 500 ms                        | QTc $\geq$ 501 ms on at least two separate ECGs | QTc $\geq$ 501 or $>60$ ms change from baseline and Torsade de pointes or polymorphic ventricular tachycardia or signs / symptoms of serious arrhythmia | - |

| Adverse Event              | Grade                                                               |                                                                                                        |                                                                      |                                                      |   |
|----------------------------|---------------------------------------------------------------------|--------------------------------------------------------------------------------------------------------|----------------------------------------------------------------------|------------------------------------------------------|---|
|                            | 1                                                                   | 2                                                                                                      | 2                                                                    | 4                                                    | 5 |
| GGT increased              | >ULN - 2.5 x ULN                                                    | >2.5 - 5.0 x ULN                                                                                       | >5.0 - 20.0 x ULN                                                    | >20.0 x ULN                                          | - |
| INR increased              | >1 - 1.5 x ULN; >1 - 1.5 times above baseline if on anticoagulation | >1.5 - 2.5 x ULN; >1.5 - 2.5 times above baseline if on anticoagulation                                | >2.5 x ULN; >2.5 times above baseline if on anticoagulation          | -                                                    | - |
| Lymphocyte count decreased | <LLN - 800/mm <sup>3</sup> ; <LLN - 0.8 x 10 <sup>9</sup> /L        | <800 - 500/mm <sup>3</sup> ; <0.8 - 0.5 x 10 <sup>9</sup> /L                                           | <500 - 200/mm <sup>3</sup> ; <0.5 - 0.2 x 10 <sup>9</sup> /L         | <200/mm <sup>3</sup> ; <0.2 x 10 <sup>9</sup> /L     | - |
| Neutrophil count decreased | <LLN - 1500/mm <sup>3</sup> ; <LLN - 1.5 x 10 <sup>9</sup> /L       | <1500 - 1000/mm <sup>3</sup> ; <1.5 - 1.0 x 10 <sup>9</sup> /L                                         | <1000 - 500/mm <sup>3</sup> ; <1.0 - 0.5 x 10 <sup>9</sup> /L        | <500/mm <sup>3</sup> ; <0.5 x 10 <sup>9</sup> /L     | - |
| Platelet count decreased   | <LLN - 75,000/mm <sup>3</sup> ; <LLN - 75.0 x 10 <sup>9</sup> /L    | <75,000 - 50,000/mm <sup>3</sup> ; <75.0 - 50.0 x 10 <sup>9</sup> /L                                   | <50,000 - 25,000/mm <sup>3</sup> ; <50.0 - 25.0 x 10 <sup>9</sup> /L | <25,000/mm <sup>3</sup> ; <25.0 x 10 <sup>9</sup> /L | - |
| Serum amylase increased    | >ULN - 1.5 x ULN                                                    | >1.5 - 2.0 x ULN                                                                                       | >2.0 - 5.0 x ULN                                                     | >5.0 x ULN                                           | - |
| White blood cell decreased | <LLN - 3000/mm <sup>3</sup> ; <LLN - 3.0 x 10 <sup>9</sup> /L       | <3000 - 2000/mm <sup>3</sup> ; <3.0 - 2.0x 10 <sup>9</sup> /L                                          | <2000 - 1000/mm <sup>3</sup> ; <2.0 - 1.0 x 10 <sup>9</sup> /L       | <1000/mm <sup>3</sup> ; <1.0 x 10 <sup>9</sup> /L    | - |
| Dysgeusia                  | Altered taste but no change in diet                                 | Altered taste with change in diet (e.g., oral supplements); noxious or unpleasant taste; loss of taste | -                                                                    | -                                                    | - |
| Nausea                     | Loss of appetite without alteration in eating habits                | Oral intake decreased without significant weight loss,                                                 | Inadequate oral caloric or fluid intake; tube feeding, TPN, or       | -                                                    | - |

| Adverse Event  | Grade                                                                         |                                                                                        |                                                                                                                          |                                                                                                      |       |
|----------------|-------------------------------------------------------------------------------|----------------------------------------------------------------------------------------|--------------------------------------------------------------------------------------------------------------------------|------------------------------------------------------------------------------------------------------|-------|
|                | 1                                                                             | 2                                                                                      | 2                                                                                                                        | 4                                                                                                    | 5     |
|                |                                                                               | dehydration or malnutrition                                                            | hospitalization indicated                                                                                                |                                                                                                      |       |
| Vomiting       | Intervention not indicated                                                    | Outpatient IV hydration;<br>medical intervention indicated                             | Tube feeding, TPN, or<br>hospitalization indicated                                                                       | Life-threatening consequences                                                                        | Death |
| Abdominal Pain | Mild pain                                                                     | Moderate pain; limiting<br>instrumental ADL                                            | Severe pain; limiting self care<br>ADL                                                                                   | -                                                                                                    | -     |
| Headache       | Mild pain                                                                     | Moderate pain; limiting<br>instrumental ADL                                            | Severe pain; limiting self-care<br>ADL                                                                                   | -                                                                                                    | -     |
| Depression     | Mild depressive symptoms                                                      | Moderate depressive<br>symptoms; limiting<br>instrumental ADL                          | Severe depressive symptoms;<br>limiting self-care ADL;<br>hospitalization not indicated                                  | Life-threatening<br>consequences, threats of<br>harm to self or others;<br>hospitalization indicated | Death |
| Insomnia       | Mild difficulty falling asleep,<br>staying asleep or waking up<br>early       | Moderate difficulty falling<br>asleep, staying asleep or<br>waking up early            | Severe difficulty in falling<br>asleep, staying asleep or<br>waking up early                                             | -                                                                                                    | -     |
| Mania          | Mild manic symptoms (e.g.,<br>elevated mood, rapid<br>thoughts, rapid speech, | Moderate manic symptoms<br>(e.g., relationship and work<br>difficulties; poor hygiene) | Severe manic symptoms (e.g.,<br>hypomania; major sexual or<br>financial indiscretions);<br>hospitalization not indicated | Life-threatening<br>consequences, threats of<br>harm to self or others;                              | Death |

| Adverse Event    | Grade                                                                                               |                                                                                                           |                                                                                                                                                                                |                                                                                                     |       |
|------------------|-----------------------------------------------------------------------------------------------------|-----------------------------------------------------------------------------------------------------------|--------------------------------------------------------------------------------------------------------------------------------------------------------------------------------|-----------------------------------------------------------------------------------------------------|-------|
|                  | 1                                                                                                   | 2                                                                                                         | 2                                                                                                                                                                              | 4                                                                                                   | 5     |
|                  | decreased need for sleep)                                                                           |                                                                                                           |                                                                                                                                                                                | hospitalization indicated                                                                           |       |
| Psychosis        | Mild psychotic symptoms                                                                             | Moderate psychotic symptoms (e.g., disorganized speech; impaired reality testing)                         | Severe psychotic symptoms (e.g., paranoid; extreme disorganization); hospitalization not indicated                                                                             | Life-threatening consequences, threats of harm to self or others; hospitalization indicated         | Death |
| Bronchospasm     | Mild symptoms; intervention not indicated                                                           | Symptomatic; medical intervention indicated; limiting instrumental ADL                                    | Limiting self-care ADL; oxygen saturation decreased                                                                                                                            | Life-threatening respiratory or hemodynamic compromise; intubation or urgent intervention indicated | Death |
| - Other, specify | Asymptomatic or mild symptoms; clinical or diagnostic observations only; intervention not indicated | Moderate; minimal, local or noninvasive intervention indicated; limiting age appropriate instrumental ADL | Severe or medically significant but not immediately life-threatening; hospitalization or prolongation of existing hospitalization indicated; disabling; limiting self-care ADL | Life-threatening consequences; urgent intervention indicated                                        | Death |

**Table 6:** Summary of Protocol Violations.

| <b>Characteristics</b>          | <b>Intervention Group<br/>(N=XX)</b> | <b>SOC Group<br/>(N=XX)</b> |
|---------------------------------|--------------------------------------|-----------------------------|
| Protocol Violations             | xx (xx.x)                            | xx (xx.x)                   |
| xxxxx                           | xx (xx.x)                            | xx (xx.x)                   |
| xxxxx                           | xx (xx.x)                            | xx (xx.x)                   |
| Reasons for protocol violations |                                      |                             |
| xxxxx                           | xx (xx.x)                            | xx (xx.x)                   |
| xxxxx                           | xx (xx.x)                            | xx (xx.x)                   |
| Any consequences                |                                      |                             |
| Yes                             | xx (xx.x)                            | xx (xx.x)                   |
| No                              | xx (xx.x)                            | xx (xx.x)                   |

Denominator of the percentage is the total number of patients in each group.

**Table 5:** Summary of Adverse Events by severity.

| Event                           | Lopinavir/ritonavir (n=XX) |              |
|---------------------------------|----------------------------|--------------|
|                                 | Any Grade                  | Grade 3 or 4 |
| <b>Any adverse event, n (%)</b> | xx (xx.x)                  | xx (xx.x)    |
| Adverse Event 1                 | xx (xx.x)                  | xx (xx.x)    |
| Adverse Event 2                 | xx (xx.x)                  | xx (xx.x)    |
| ...                             | xx (xx.x)                  | xx (xx.x)    |
| <b>Serious adverse event</b>    | xx (xx.x)                  | xx (xx.x)    |
| Serious Adverse Event 1         | xx (xx.x)                  | xx (xx.x)    |
| Serious Adverse Event 2         | xx (xx.x)                  | xx (xx.x)    |
| ...                             | xx (xx.x)                  | xx (xx.x)    |

Denominator of the percentage is the total number of patients in the each group.
